# Supplementary material for: Influence of the heavy-atom effect on singlet fission: a study of platinum-bridged pentacene dimers
Source: PubMed Central journal article supplement (PMC7069226; doi:10.1039/c9sc04410h), 2019-10-21
Supplement: SC-010-C9SC04410H-s001.pdf [file SC-010-C9SC04410H-s001.pdf]

## Electronic Supplementary Information

for

### Influence of the Heavy-Atom Effect on Singlet Fission: A Study of Platinum-Bridged Pentacene Dimers

Bettina S. Basel<sup>a\*</sup>, Ryan M. Young<sup>b\*</sup>, Matthew D. Krzyaniak<sup>b\*</sup>, Ilias Papadopoulos<sup>a\*</sup>, Constantin Hetzer<sup>c</sup>, Yueze Gao<sup>d</sup>, Nathan T. La Porte<sup>b</sup>, Brian T. Phelan<sup>b</sup>, Tim Clark<sup>e</sup>, Rik R. Tykwinski<sup>d</sup>, Michael R. Wasielewski<sup>b</sup>, and Dirk M. Guldi<sup>a</sup>

\*Authors contributed equally.

<sup>a</sup>Department of Chemistry and Pharmacy & Interdisciplinary Center for Molecular Materials (ICMM), Friedrich-Alexander-Universität Erlangen-Nürnberg (FAU), Egerlandstrasse 3, 91058 Erlangen, Germany.

<sup>b</sup>Department of Chemistry and Institute for Sustainability and Energy at Northwestern (ISEN), Northwestern University, Evanston, IL 60208-3113, USA.

<sup>c</sup>Department of Chemistry and Pharmacy & Interdisciplinary Center for Molecular Materials (ICMM), Friedrich-Alexander-Universität Erlangen-Nürnberg (FAU), Nikolaus-Fiebiger-Strasse 10, 91058 Erlangen, Germany.

<sup>d</sup>Department of Chemistry, University of Alberta, Edmonton, Alberta, T6G 2G2 Canada.

<sup>e</sup>Department of Chemistry and Pharmacy & Computer-Chemistry-Center (CCC), Friedrich-Alexander-Universität Erlangen-Nürnberg (FAU), Nögelsbachstrasse 25, 91052 Erlangen, Germany.

**Correspondence to:** dirk.guldi@fau.de, m-wasielewski@northwestern.edu,  
rik.tykwinski@ualberta.ca, tim.clark@fau.de

## Contents

|                                                                                            |    |
|--------------------------------------------------------------------------------------------|----|
| General procedures and methods .....                                                       | 3  |
| Synthesis.....                                                                             | 3  |
| Spectroscopy .....                                                                         | 3  |
| Modeling.....                                                                              | 5  |
| Supplemental synthesis procedures .....                                                    | 7  |
| Supplemental photophysical characterization .....                                          | 23 |
| Analysis methods of the transient data.....                                                | 23 |
| Analysis of the TA data with sequential global analysis.....                               | 23 |
| Analysis of the fsIR data .....                                                            | 23 |
| Calculation of the triplet quantum yields .....                                            | 23 |
| Analysis of the TA data with target analysis .....                                         | 23 |
| Analysis of the TREPR data .....                                                           | 24 |
| Supplemental photophysical data .....                                                      | 25 |
| Supplemental steady-state characterization .....                                           | 25 |
| Supplemental transient absorption data in butyronitrile .....                              | 30 |
| Global target analysis .....                                                               | 37 |
| Supplemental polarity-dependent characterization .....                                     | 40 |
| Supplemental transient and steady-state IR data .....                                      | 44 |
| Comparison of <i>trans</i> - and <i>cis</i> -Pt with other covalent pentacene dimers ..... | 45 |
| Supplemental theory results .....                                                          | 46 |
| HF/LANL2DZ-optimized geometries.....                                                       | 46 |
| <i>Trans</i> -Pt.....                                                                      | 46 |
| <i>Cis</i> -Pt.....                                                                        | 51 |
| PM6 (CIS=96) calculated spectra.....                                                       | 56 |
| <i>Trans</i> -Pt.....                                                                      | 56 |
| <i>Cis</i> -Pt.....                                                                        | 66 |
| References .....                                                                           | 71 |

## General procedures and methods

### Synthesis

Reagents were purchased reagent grade from commercial suppliers and used without further purification. THF was dried under nitrogen in a commercial solvent purification system (LC Technology Solutions INC.).  $\text{MgSO}_4$  was used as the drying reagent after aqueous work-up.  $^1\text{H}$ ,  $^{13}\text{C}$ , and  $^{31}\text{P}$  NMR spectra were recorded on a Bruker Advance 300 ( $^1\text{H}$ : 300 MHz,  $^{31}\text{P}$ : 121 MHz), a Bruker Advance 400 ( $^1\text{H}$ : 400 MHz,  $^{13}\text{C}$ : 100 MHz), and an Agilent/Varian Inova four-channel 500 ( $^1\text{H}$ : 500 MHz,  $^{13}\text{C}$ : 126 MHz, and  $^{31}\text{P}$ : 202 MHz). NMR spectra were recorded at ambient probe temperature. For simplicity, the coupling constants of protons in all  $^1\text{H}$  spectra have been reported as pseudo first-order when possible, even though they can be higher-order (ABC, ABX, AA'XX') spin systems, and coupling constants have been reported as observed. UV/Vis measurements were carried out on a Varian Cary 5000 UV-Vis-NIR spectrophotometer or a Cary-400 spectrophotometer at room temperature. IR spectra were recorded on a Varian 660-IR spectrometer as solids in ATR mode or on a Thermo Nicolet 8700 FTIR spectrometer and continuum FTIR microscope as a film. Melting points were measured with a Melting Point M-560 instrument. Differential scanning calorimetry (DSC) measurements were made on a Mettler Toledo TGA/STDA 851e/1100/SF. TLC analyses were carried out on TLC plates from Macherey-Nagel (ALUGRAM® SIL G/UV254) and visualized via UV-light (264/364 nm) or standard coloring reagents. Column chromatography used Silica Gel 60M (Merck).

Compounds **1**<sup>1</sup> and **model-Pt**<sup>2,3</sup> were synthesized as previously reported.

### Spectroscopy

All solvents were purchased from commercial suppliers and used without further purification.

Steady-state UV-vis absorption spectra were acquired at room temperature (RT) using a Perkin Elmer Lambda 2 spectrometer. Steady-state fluorescence spectra were carried out at a FluoroMax3 spectrometer from Horiba in the visible detection range (RT). Fluorescence quantum yields were measured relative to a zinc phthalocyanine used as a reference compound.<sup>4</sup>

Fourier transform infrared spectroscopy (FTIR) was performed with a Shimadzu IRAffinity-1 spectrometer. A liquid demountable cell (Harrick Scientific) with 2.0 mm thick  $\text{CaF}_2$  windows and a 500  $\mu\text{m}$  Teflon spacer was used to investigate the dissolved samples.

Femtosecond (fs) and nanosecond (ns) transient absorption (TA) experiments (RT and 85 K) were carried out using the EOS System, a broadband pump-probe sub-nanosecond transient absorption

spectrometer, with an integrated customized HELIOS System, broadband pump-probe femtosecond transient absorption spectrometer from Ultrafast Systems, Inc. The transient absorption pump-probe detection system utilizes shot-by-shot acquisition with balanced detection. Balanced detection is accomplished by using the probe-reference method, where the probe beam is split into two before passing through the sample. While one of the two probe beams travels through the sample, the other is sent directly to the reference spectrometer that monitors the fluctuations in the probe beam intensity. For HELIOS (fsTA) measurements in butyronitrile, a regeneratively amplified Ti:sapphire Spitfire Pro fs laser system (Spectra-Physics Tsunami oscillator/Spitfire amplifier: output 827 nm, 1 kHz, 100 fs pulse width, standard deviation <0.5 %) was used and the excitation wavelengths were generated with a laboratory-constructed collinear optical parametric amplifier (standard deviation <2 %), described previously.<sup>5</sup> For the HELIOS measurements (fsTA) in all other solvent (benzonitrile, toluene and THF), an amplified Ti:Sapphire CPA-2110 fs laser system (Clark MXR: output 775 nm, 1 kHz, 150 fs pulse width, standard deviation <0.5 %) was used. The excitation wavelengths were generated with a noncollinear optical parametric amplifier (NOPA, Clark MXR, standard deviation <2 %). For all HELIOS (fsTA) measurements, the white light probe was generated in sapphire crystals (standard deviation <2 %).

For nsTA measurements two independent pulsed light sources are used: the same laser source for pumping as in HELIOS, and a pulsed supercontinuum laser (output 350–2200 nm, 2 kHz, 700 ps<sup>-1</sup> ns pulse width, standard deviation <1 %) as white light source for probing as part of the EOS spectrometer.

Low temperature (LT) nanosecond (ns) transient absorption (TA) experiments (85 K) were carried out using the same customized transient absorption pump-probe detection systems as described above. Samples were placed in a liquid nitrogen cryostat (VNF-100, Janus Research Company). Samples for nsTA at 85 K were prepared in an N<sub>2</sub>-filled glovebox. The solutions were loaded into an optical sample cell consisting of two quartz windows separated by a 2 mm PTFE spacer, and the cell was sealed under N<sub>2</sub>. Low temperature samples in butyronitrile (PrCN) were cooled rapidly to 85 K by flooding the cryostat with liquid N<sub>2</sub> to produce a frozen glass.<sup>6, 7</sup>

Femtosecond transient mid-infrared absorption (fsIR) spectroscopy was accomplished using a previously described instrument.<sup>8</sup> Briefly, the output of an amplified Ti:sapphire laser system (Spectra-Physics Solstice, output: 800 nm, 1 kHz, ~100 fs) was split to pump two collinear optical parametric amplifiers (TOPAS-C, Light-Conversion, LLC) to generate the visible pump (650 nm, 2 μJ/pulse) and mid-IR probe pulses (1900–2300 cm<sup>-1</sup>), respectively. Pump and probe beams were directed into an N<sub>2</sub>-purged commercial spectrometer (customized HELIOS-FIRE, Ultrafast Systems LLC) that utilizes a HgCdTe detector. Samples with a maximum optical density of 1.5 at the excitation wavelength were

prepared were prepared in an N<sub>2</sub>-filled glovebox and contained in a liquid demountable cell (Harrick Scientific) with 2.0 mm thick CaF<sub>2</sub> windows and a 500 μm Teflon spacer. Samples were rastered normal to both pump and probe beams in a randomized pattern to reduce the effect of localized heating or sample degradation.

For fsTA, nsTA and fsIR, the pump beam polarization was spatially randomized using a commercial depolarizer (DPU-25-A, Thorlabs, Inc.) to eliminate the influence of orientational dynamics.

Femtosecond transient absorption data were fitted using multiwavelength analysis with Origin (OriginLab, Northampton, MA) or global analysis. The global fitting was performed with the open-source software package Glotaran.<sup>9-11</sup> Glotaran is a free, Java-based graphical user interface to the R package TIMP, developed for global and target analysis of time-resolved spectroscopy. The wavelength dependent character (dispersion) of the instrument response function (IRF) was modeled and taken into account.

EPR measurements were made at the X-band (~9.5 GHz) using a Bruker Elexsys E680-X/W EPR spectrometer outfitted with a split ring resonator (ER4118XMS3). Measurements were performed at 85 K using an Oxford Instruments CF935 continuous flow cryostat with liquid N<sub>2</sub>, respectively. Time-resolved EPR measurements were performed following photoexcitation with 7 ns, 3.2 mJ, 590 nm pulses using the output of an optical parametric oscillator (Spectra-Physics Basi-scan), pumped with the output of a frequency tripled Nd:YAG laser (Spectra-Physics Quanta-Ray Lab 150).

Transient EPR spectra were collected following laser photoexcitation, the transient magnetization was detected in quadrature under CW microwave irradiation (5 mW), without field modulation. Sweeping the magnetic field gave 2D spectra versus both time and magnetic field. For each kinetic trace, the signal acquired prior to the laser pulse was subtracted from the data. Kinetic traces recorded at magnetic field values off resonance were considered background signals, whose average was subtracted from all kinetic traces. The spectra were processed in Matlab (The Mathworks, Natick, MA, USA) using house written scripts and fit using EasySpin.<sup>12</sup>

## Modeling

The geometries of the *cis*- and *trans*-compounds were optimized at the RHF/LANL2DZ<sup>13, 14</sup> level with Gaussian16.<sup>15</sup> The X-ray structure served as the starting point for the *trans*-compound and the initial geometry for the *cis* was built from the structure thus obtained. The geometries thus obtained were used for semiempirical configuration interaction calculations with single excitations (CIS) using the PM6 Hamiltonian<sup>16</sup> with 48 occupied and 48 virtual orbitals as the active space. The spectrum of the *trans*-

compound was also calculated in benzonitrile solvent using the polarizable continuum model<sup>17</sup> without the dispersion contribution. We were unable to calculate a spectrum for the *cis*-compound in solution because it did not give a suitable cavity. All semiempirical calculations used the in-house version of VAMP.<sup>18</sup>

## Supplemental synthesis procedures

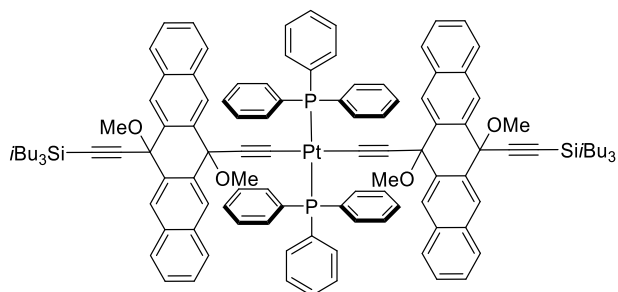

Compound **2**: Acetylene **1** (0.30 g, 0.51 mmol) and *cis*-Pt(PPh<sub>3</sub>)<sub>2</sub>Cl<sub>2</sub> (0.12 g, 0.15 mmol) were suspended in dry, deoxygenated THF (50 mL) and dry, deoxygenated *i*Pr<sub>2</sub>NH (30 mL). CuI (0.0023 g, 0.012 mmol) was added and the mixture was allowed to stir for 48 h at room temperature. Water was added (100 mL), and the aqueous phase extracted with CH<sub>2</sub>Cl<sub>2</sub> (3 x 50 mL). The combined organic phases were washed with brine (100 mL), dried (MgSO<sub>4</sub>), and the solvent removed *in vacuo*. Recrystallization from CH<sub>2</sub>Cl<sub>2</sub> (5 mL) and MeOH (50 mL) at 5 °C afforded compound **2** (0.227 g, 80%) as a yellowish solid that is unstable on silica gel. Mp 182–184 °C (decomp). IR (ATR, solid state) 3054 (w), 2950 (m), 2866 (m), 2165 (m), 2120 (m), 1434 (m) cm<sup>-1</sup>. <sup>1</sup>H NMR (400 MHz, CDCl<sub>3</sub>) δ 8.21 (s, 4H), 7.93 (s, 4H), 7.84 (d, *J* = 7.7 Hz, 4H), 7.72–7.67 (m, 12H), 7.51 (d, *J* = 7.6 Hz, 4H), 7.46–7.39 (m, 8H), 6.86–6.95 (m, 18H), 2.59 (s, 6H), 2.18 (s, 6H), 1.68 (nonet, *J* = 6.6 Hz, 6H), 0.78 (d, *J* = 6.6 Hz, 36H), 0.48 (d, *J* = 6.9 Hz, 12H). <sup>13</sup>C NMR (100 MHz, CDCl<sub>3</sub>) δ 135.4, 134.9 (pseudo-t, *J*<sub>C-P</sub> = 6.1 Hz), 133.7, 132.9, 132.7, 131.3 (pseudo-t, <sup>1</sup>*J*<sub>C-P</sub> = 29.5 Hz), 129.8, 128.3, 128.1, 127.8, 127.6 (pseudo-t, *J*<sub>C-P</sub> = 5.3 Hz), 126.5, 125.6, 125.58, 109.2, 89.1, 75.8, 73.4, 51.2, 50.6, 26.2, 24.9, 24.8 (two signals coincident or not observed). <sup>31</sup>P NMR (121 MHz, CD<sub>2</sub>Cl<sub>2</sub>) δ 18.4 (pseudo-t, *J*<sub>P-Pt</sub> = 2636 Hz). APPI HRMS calcd for C<sub>115</sub>H<sub>117</sub>O<sub>3</sub>P<sub>2</sub><sup>195</sup>PtSi<sub>2</sub> ([M – OMe]<sup>+</sup>) 1858.7659, found 1858.7684.

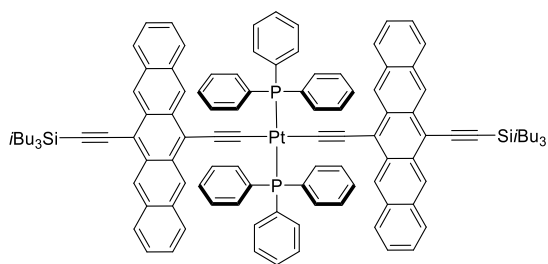

Compound **trans-Pt**: To a solution of **2** (0.15 g, 0.079 mmol) in dry, deoxygenated THF (15 mL) was added  $\text{SnCl}_2 \cdot 2\text{H}_2\text{O}$  (0.14 g, 0.62 mmol) and 10%  $\text{H}_2\text{SO}_4$  (0.5 mL) at room temperature. The flask was wrapped in aluminum foil in order to limit light exposure. The reaction mixture was stirred for 5 h and then poured into MeOH (70 mL) and cooled to  $-78\text{ }^\circ\text{C}$ . The suspension was filtered, and the residue was washed with MeOH (3 x 20 mL). The solid was dissolved in  $\text{CH}_2\text{Cl}_2$  (30 mL), washed with water (100 mL), brine (100 mL), dried ( $\text{MgSO}_4$ ), and the solvent removed by passing  $\text{N}_2$  over the solution. Column chromatography (silica,  $\text{CH}_2\text{Cl}_2$ /hexanes 1:2) afforded compound **trans-Pt** (0.083 g, 60%) as a deep blue solid. Mp  $206\text{--}208\text{ }^\circ\text{C}$  (decomp).  $R_f = 0.70$  ( $\text{CH}_2\text{Cl}_2$ /hexanes 1:3). UV-vis ( $\text{CH}_2\text{Cl}_2$ )  $\lambda_{\text{max}}$  ( $\epsilon$ ): 259 (49600), 316 (278000), 547 (sh, 4000), 599 (sh, 9000), 654 (17500), 702 (sh, 16500). IR (ATR, solid state) 3048 (w), 2948 (m), 2863 (m), 2069 (m), 1432 (m)  $\text{cm}^{-1}$ .  $^1\text{H}$  NMR (300 MHz,  $\text{CD}_2\text{Cl}_2$ )  $\delta$  9.09 (s, 4H), 8.54 (s, 4H), 8.08–8.02 (m, 12H), 7.93–7.90 (m, 4H), 7.62–7.60 (m, 4H), 7.39–7.34 (m, 8H), 7.12 (t,  $J = 7.2$  Hz, 12H), 7.01 (t,  $J = 7.3$  Hz, 6H), 2.21 (nonet,  $J = 6.7$  Hz, 6H), 1.20 (d,  $J = 6.6$  Hz, 36H), 0.97 (d,  $J = 6.9$  Hz, 12H).  $^{13}\text{C}$  NMR (100 MHz,  $\text{CD}_2\text{Cl}_2$ )  $\delta$  135.3 (pseudo-t,  $J_{\text{C-P}} = 6.0$  Hz), 133.5, 132.5, 131.4 (pseudo-t,  $^1J_{\text{C-P}} = 29.6$  Hz), 131.3, 131.0, 130.95, 129.7, 129.4, 128.6, 128.3 (pseudo-t,  $J_{\text{C-P}} = 5.6$  Hz), 128.1, 126.0, 125.9, 125.2, 125.1, 113.8, 112.5, 107.7, 105.8, 26.7, 25.80, 25.77 ( $J_{\text{C-P}}$  not resolved for acetylenic carbons).  $^{31}\text{P}$  NMR (121 MHz,  $\text{CD}_2\text{Cl}_2$ )  $\delta$  18.6 (pseudo-t,  $J_{\text{P-Pt}} = 2603$  Hz). APPI HRMS calcd for  $\text{C}_{112}\text{H}_{108}\text{P}_2^{195}\text{PtSi}_2$  ( $\text{M}^+$ ) 1765.7107, found 1765.7107. DSC: decomposition,  $266\text{ }^\circ\text{C}$  (onset),  $403\text{ }^\circ\text{C}$  (peak).



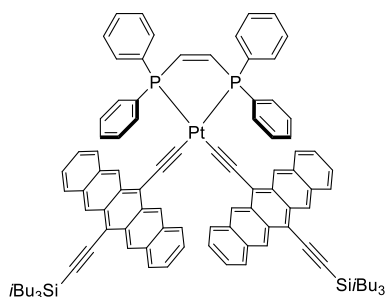

Compound ***cis*-Pt**. *cis*-1,2-(Diphenylphosphino)ethylene (0.026 g, 0.064 mmol) and ***trans*-Pt** (0.100 g, 0.056 mmol) were dissolved in dry, deoxygenated CH<sub>2</sub>Cl<sub>2</sub> (20 mL). The flask was wrapped in alumina foil in order to limit light exposure. The mixture was stirred for 48 h at room temperature, and the solvent was removed by passing N<sub>2</sub> over the solution. Purification was achieved by column chromatography (SiO<sub>2</sub>, hexanes/CH<sub>2</sub>Cl<sub>2</sub> 2:1) followed by recrystallization from CH<sub>2</sub>Cl<sub>2</sub> (2 mL) and MeOH (20 mL) at 5 °C. The resulting suspension was filtered, and washed with MeOH (30 mL), affording ***cis*-Pt** (0.0734 g, 80%) as a dark blue solid. Mp 194–196 °C. *R*<sub>f</sub> = 0.65 (CH<sub>2</sub>Cl<sub>2</sub>/hexanes 1:3). UV-vis (CH<sub>2</sub>Cl<sub>2</sub>) λ<sub>max</sub> (ε): 273 (55500), 314 (370000), 548 (sh, 6430), 585 (sh, 12500), 632 (23000), 670 (23700). IR (ATR, solid state) 3048 (w), 2948 (m), 2864 (m), 2084 (m), 1434 (m) cm<sup>-1</sup>. <sup>1</sup>H NMR (300 MHz, CD<sub>2</sub>Cl<sub>2</sub>) δ 9.37 (s, 4H), 9.12 (s, 4H), 8.20–8.14 (m, 8H), 7.82 (d, *J* = 8.7 Hz, 4H), 7.56–7.43 (m, 14H), 7.22 (t, *J* = 6.7 Hz, 4H), 7.14 (d, *J* = 8.7 Hz, 4H), 6.91 (t, *J* = 6.7 Hz, 4H), 2.21 (nonet, *J* = 6.7 Hz, 6H), 1.19 (d, *J* = 6.6 Hz, 36H), 0.97 (d, *J* = 6.9 Hz, 12H). <sup>13</sup>C NMR (100 MHz, CD<sub>2</sub>Cl<sub>2</sub>) δ 134.1–134.0 (m), 133.9, 132.5, 132.2, 131.7, 131.4, 130.6, 130.5, 130.0, 129.7–129.5 (m), 129.0, 128.4, 128.0, 125.9, 125.6, 125.0, 124.6, 114.4, 110.4, 108.3, 105.7, 26.7, 25.81, 25.78 (*J*<sub>C-P</sub> not resolved for acetylenic carbons). <sup>31</sup>P NMR (121 MHz, CD<sub>2</sub>Cl<sub>2</sub>) δ 55.1 (pseudo-t, *J*<sub>P-Pt</sub> = 2292 Hz). APPI HRMS calcd for C<sub>102</sub>H<sub>100</sub>P<sub>2</sub><sup>195</sup>PtSi<sub>2</sub> (M<sup>+</sup>) 1637.6481, found 1637.6497. DSC: decomposition, 265 °C (onset), 399 °C (peak).

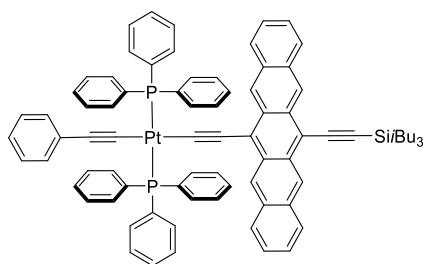

Compound **mono-Pt**: To a freshly deoxygenated solution of acetylene **1** (130mg, 0.221 mmol) in HNEt<sub>2</sub> (40 mL) were added *cis*-Pt(PPh<sub>3</sub>)<sub>2</sub>Cl<sub>2</sub> (175 mg, 0.221 mmol), freshly deoxygenated phenylacetylene (22.6 mg, 0.221 mmol), and CuI (8.4 mg, 0.044 mmol). The mixture was stirred for 16.5 h at 50 °C under a N<sub>2</sub> atmosphere. Water was added (50 mL), and the aqueous phase extracted with CH<sub>2</sub>Cl<sub>2</sub> (2 x 30 mL). The combined organic phases were washed with brine (100 mL), dried (MgSO<sub>4</sub>), and the solvent removed *in vacuo*. Without further purification, the product was dissolved in dry, deoxygenated THF (30 mL). To the solution were added SnCl<sub>2</sub>•2H<sub>2</sub>O (130 mg, 0.576 mmol) and 10% H<sub>2</sub>SO<sub>4</sub> (0.2 mL) at room temperature. The flask was wrapped in aluminum foil in order to limit light exposure. The mixture was stirred for 4 h at room temperature under a N<sub>2</sub> atmosphere. Water was added (60 mL), and the aqueous phase was extracted with CH<sub>2</sub>Cl<sub>2</sub> (2 x 40 mL). The combined organic phases were washed with brine (100 mL) and dried (MgSO<sub>4</sub>). Solvent removal and purification by column chromatography (silica gel, hexanes/DCM 3:1) afforded **mono-Pt** (105 mg, 35%) as a deep blue solid. Mp 245–248 °C. *R*<sub>f</sub> = 0.54 (CH<sub>2</sub>Cl<sub>2</sub>/hexanes 1:1). UV-vis (CH<sub>2</sub>Cl<sub>2</sub>) λ<sub>max</sub> (ε): 259 (57600), 269 (sh, 53400), 317 (244000), 389 (sh, 8870), 440 (2900), 507 (sh, 1960), 550 (sh, 3750), 602 (sh, 8680), 654 (14100), 702 (sh, 10800). IR (cast film, CH<sub>2</sub>Cl<sub>2</sub>) 3054 (w), 2952 (m), 2867 (m), 2118 (w), 2079 (m), 1503 (m), 1435 (m) cm<sup>-1</sup>. <sup>1</sup>H NMR (500 MHz, CD<sub>2</sub>Cl<sub>2</sub>) δ 9.02 (s, 2H), 8.46 (s, 2H), 7.95–7.91 (m, 12H), 7.86 (d, *J* = 8.2 Hz 2H), 7.49 (d, *J* = 8.3 Hz, 2H), 7.34–7.29 (m, 4H), 7.27–7.21 (m, 18H), 6.96–6.94 (m, 3H), 6.35–6.34 (m, 2H), 2.16 (nonet, *J* = 6.7 Hz, 3H), 1.15 (d, *J* = 6.6 Hz, 18H), 0.92 (d, *J* = 6.9 Hz, 6H). <sup>13</sup>C NMR (126 MHz, CD<sub>2</sub>Cl<sub>2</sub>) δ 135.6 (pseudo-t, *J*<sub>C-P</sub> = 6.2 Hz), 132.7, 131.8 (pseudo-t, <sup>1</sup>*J*<sub>C-P</sub> = 29.4 Hz), 131.6, 131.4, 131.2, 131.1, 129.9, 129.5, 128.9, 128.8, 128.5 (pseudo-t, *J*<sub>C-P</sub> = 5.4 Hz), 128.3, 127.8, 126.2, 125.4, 125.37, 125.2, 113.9, 113.5, 112.6, 111.5 (pseudo-t, <sup>1</sup>*J*<sub>C-P</sub> = 29.9 Hz), 107.8, 106.1 (pseudo-t, <sup>1</sup>*J*<sub>C-P</sub> = 27.6 Hz), 26.9, 26.0, 26.0 (two signals coincident or not observed). <sup>31</sup>P NMR (202 MHz, CD<sub>2</sub>Cl<sub>2</sub>) δ 18.6 (pseudo-t, *J*<sub>P-Pt</sub> = 2622 Hz). APPI HRMS calcd for C<sub>82</sub>H<sub>74</sub>P<sub>2</sub><sup>195</sup>PtSi<sub>2</sub> ([M + H]<sup>+</sup>) 1344.4761, found 1344.4734. DSC: decomposition, 264 °C (onset), 265 °C (peak).

CRH228

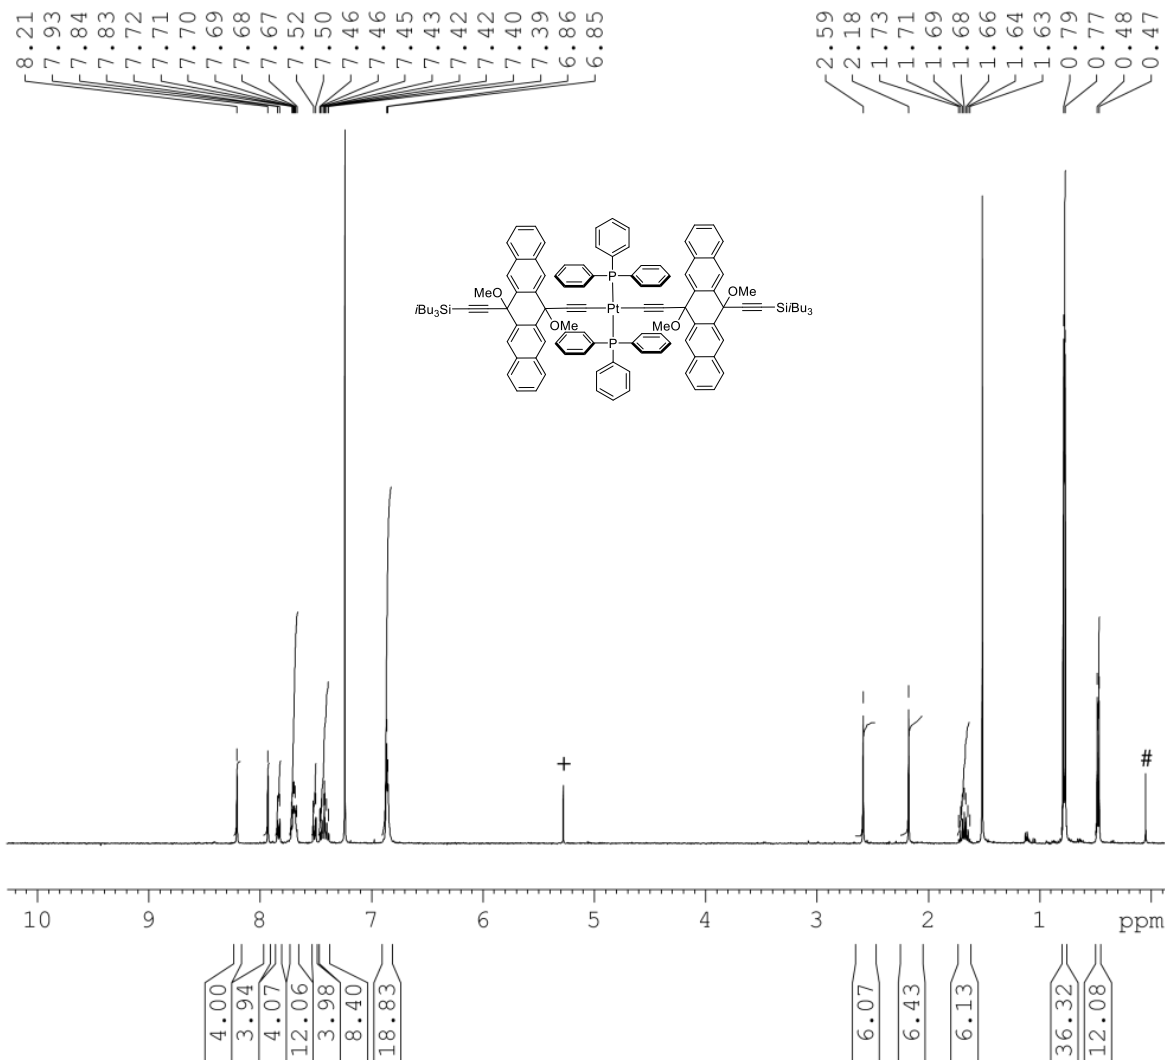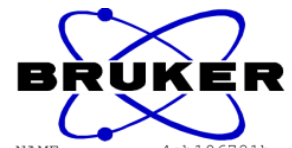

NAME 4ch106721h  
 EXPNO 1  
 PROCNO 1  
 Date\_ 20160410  
 Time\_ 14.56  
 INSTRUM spect  
 PROBHD 5 mm PABBO BB-  
 PULPROG zg30  
 TD 65536  
 SOLVENT CDC13  
 NS 8  
 DS 2  
 SWH 8278.146 Hz  
 FIDRES 0.126314 Hz  
 AQ 3.9584243 sec  
 RG 812.7  
 DW 60.400 usec  
 DE 9.00 usec  
 TE 299.3 K  
 D1 2.0000000 sec  
 TD0 1

===== CHANNEL f1 =====  
 NUC1 1H  
 P1 12.13 usec  
 PL1 0.00 dB  
 SFO1 400.1324710 MHz  
 SI 32768  
 SF 400.1300178 MHz  
 WDW EM  
 SSB 0  
 LB 0.30 Hz  
 GB 0  
 PC 1.00

Figure S1.  $^1\text{H}$  NMR spectrum of compound 2 (400 MHz,  $\text{CDCl}_3$ , rt, + =  $\text{CH}_2\text{Cl}_2$ , # = grease).

CRH228

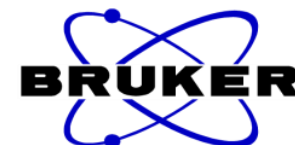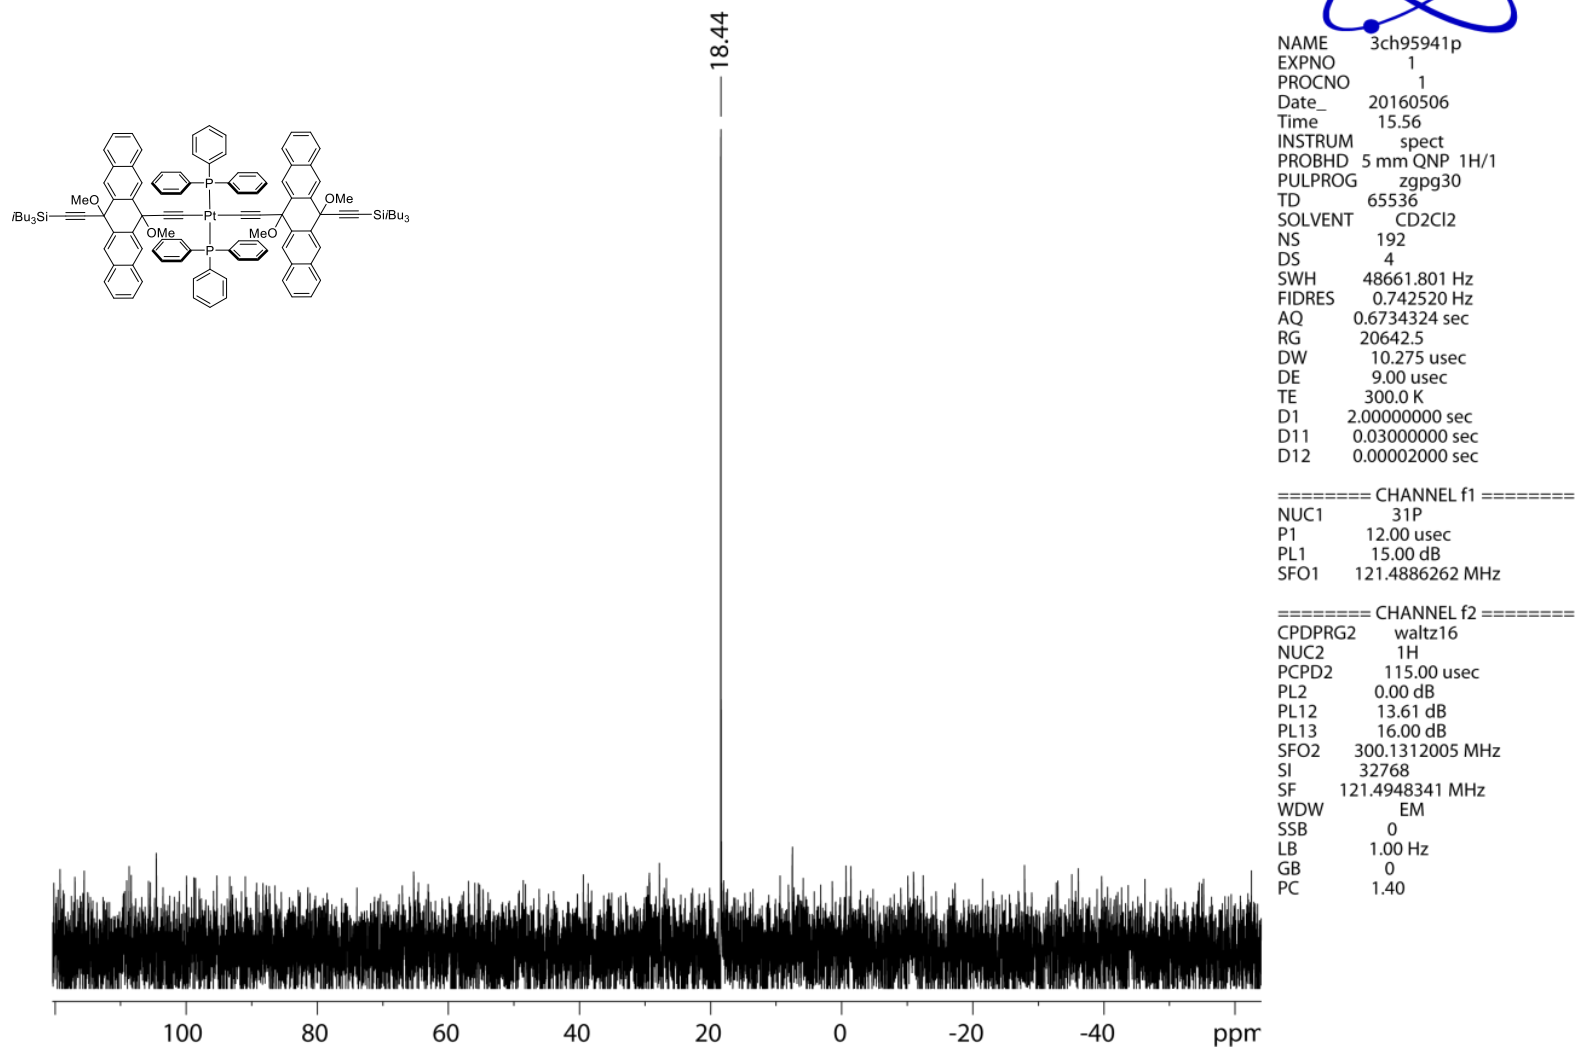

**Figure S2.**  $^{31}\text{P}$  NMR spectrum of compound **2** (121 MHz,  $\text{CD}_2\text{Cl}_2$ , rt).

CRH228

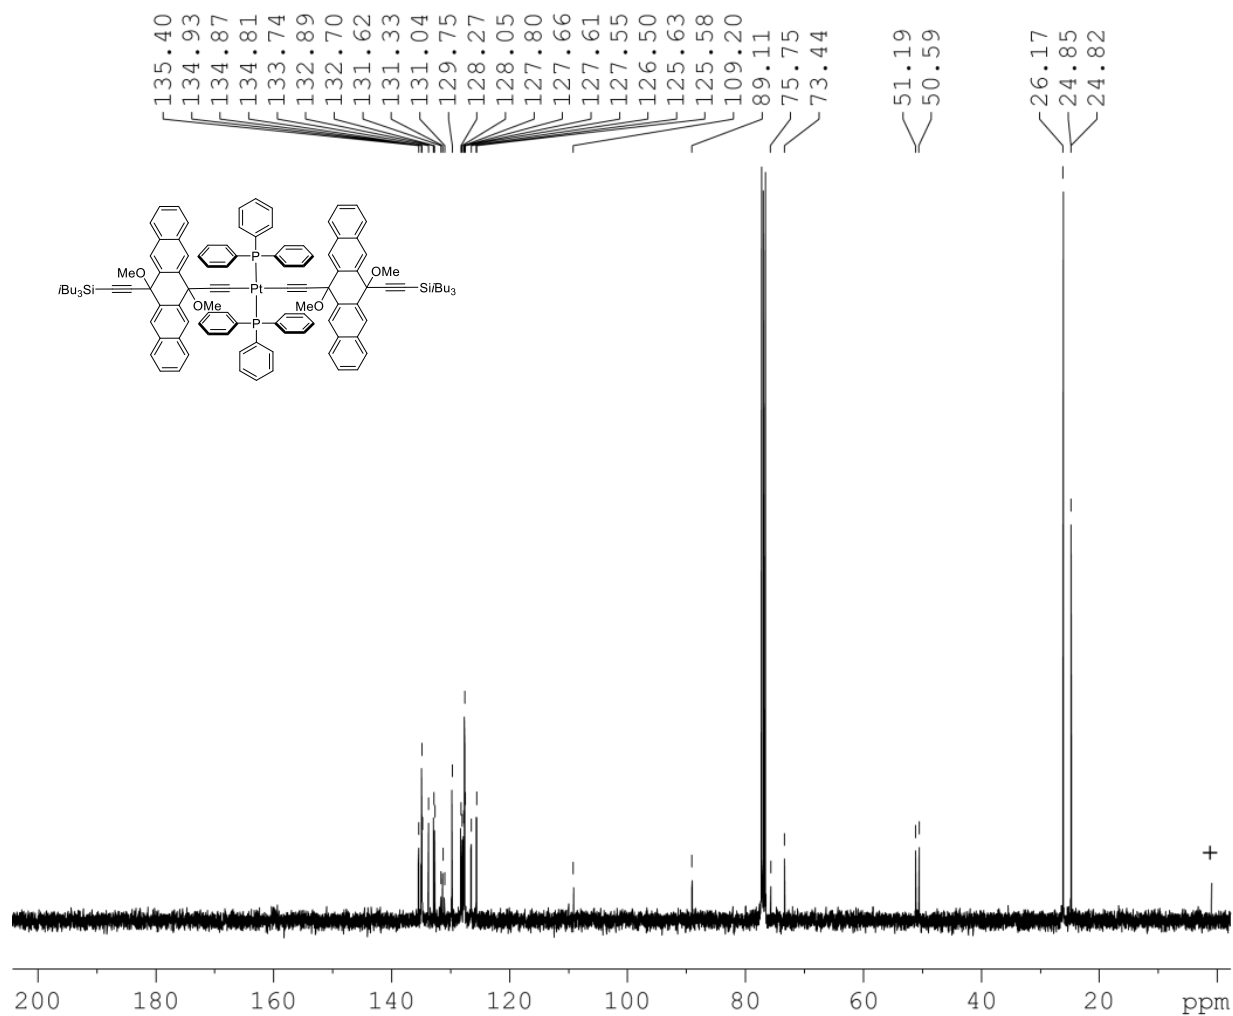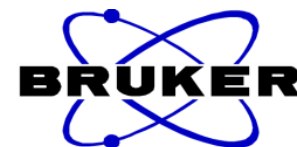

```
NAME      4ch106725c2
EXPNO     1
PROCNO    1
Date_     20160410
Time      16.36
INSTRUM   spect
PROBHD    5 mm PABBO BB-
PULPROG   zgpg30
TD         65536
SOLVENT   CDC13
NS         311
DS         4
SWH       23980.814 Hz
FIDRES    0.365918 Hz
AQ         1.3664756 sec
RG         46341
DW         20.850 usec
DE         9.00 usec
TE         299.5 K
D1         4.00000000 sec
D11        0.03000000 sec
TD0        1
```

```
===== CHANNEL f1 =====
NUC1      13C
P1         6.05 usec
PL1        0.00 dB
SFO1      100.6227898 MHz
```

```
===== CHANNEL f2 =====
CPDPRG2   waltz16
NUC2       1H
PCPD2     116.00 usec
PL2        0.00 dB
PL12      21.51 dB
PL13      120.00 dB
SFO2      400.1316005 MHz
SI         32768
SF         100.6127724 MHz
WDW        EM
SSB        0
LB         1.00 Hz
GB         0
PC         1.40
```

**Figure S3.**  $^{13}\text{C}$  NMR spectrum of compound **2** (100 MHz,  $\text{CDCl}_3$ , rt, + = grease).

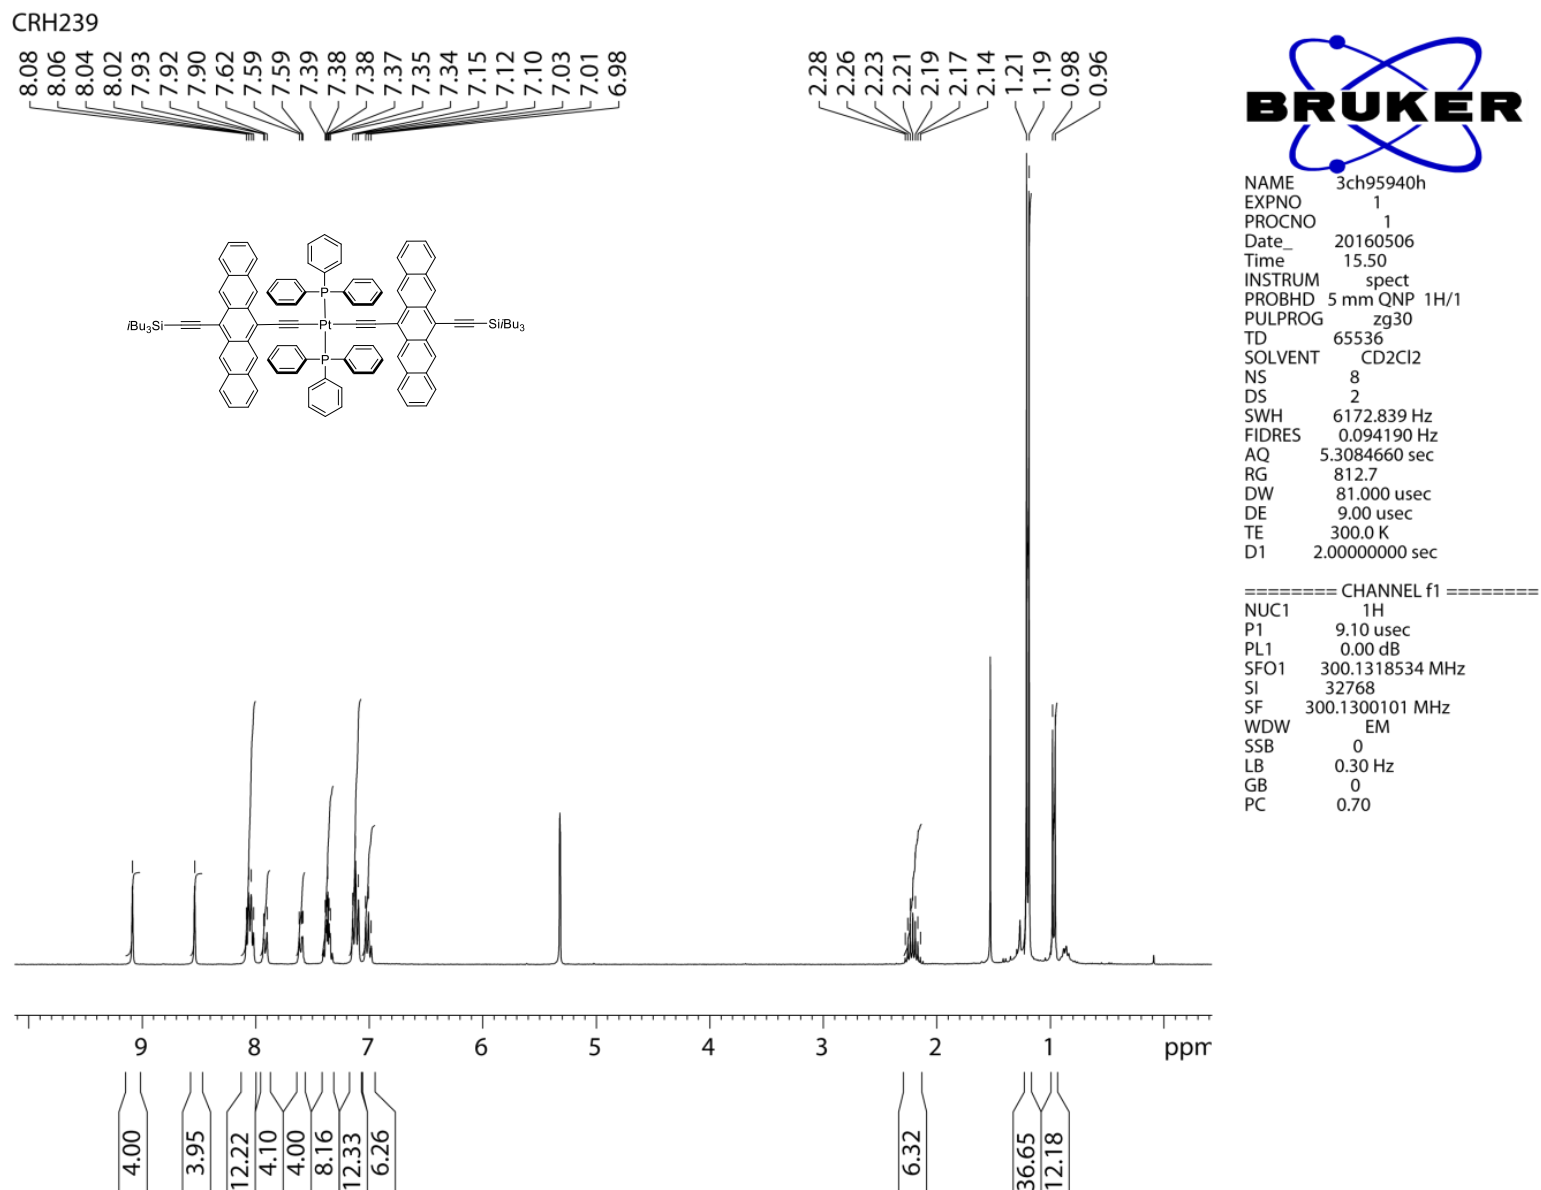

Figure S4.  $^1\text{H}$  NMR spectrum of compound *trans*-Pt (300 MHz,  $\text{CD}_2\text{Cl}_2$ , rt).

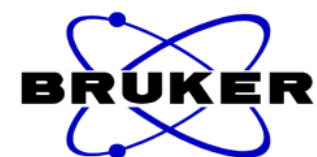

NAME 3ch95940p  
 EXPNO 1  
 PROCNO 1  
 Date\_ 20160506  
 Time 15.45  
 INSTRUM spect  
 PROBHD 5 mm QNP 1H/1  
 PULPROG zgpg30  
 TD 65536  
 SOLVENT CD2Cl2  
 NS 64  
 DS 4  
 SWH 48661.801 Hz  
 FIDRES 0.742520 Hz  
 AQ 0.6734324 sec  
 RG 18390.4  
 DW 10.275 usec  
 DE 9.00 usec  
 TE 300.0 K  
 D1 2.00000000 sec  
 D11 0.03000000 sec  
 D12 0.00002000 sec

===== CHANNEL f1 =====  
 NUC1 31P  
 P1 12.00 usec  
 PL1 15.00 dB  
 SFO1 121.4886262 MHz

===== CHANNEL f2 =====  
 CPDPRG2 waltz16  
 NUC2 1H  
 PCPD2 115.00 usec  
 PL2 0.00 dB  
 PL12 13.61 dB  
 PL13 16.00 dB  
 SFO2 300.1312005 MHz  
 SI 32768  
 SF 121.4948330 MHz  
 WDW EM  
 SSB 0  
 LB 1.00 Hz  
 GB 0  
 PC 1.40

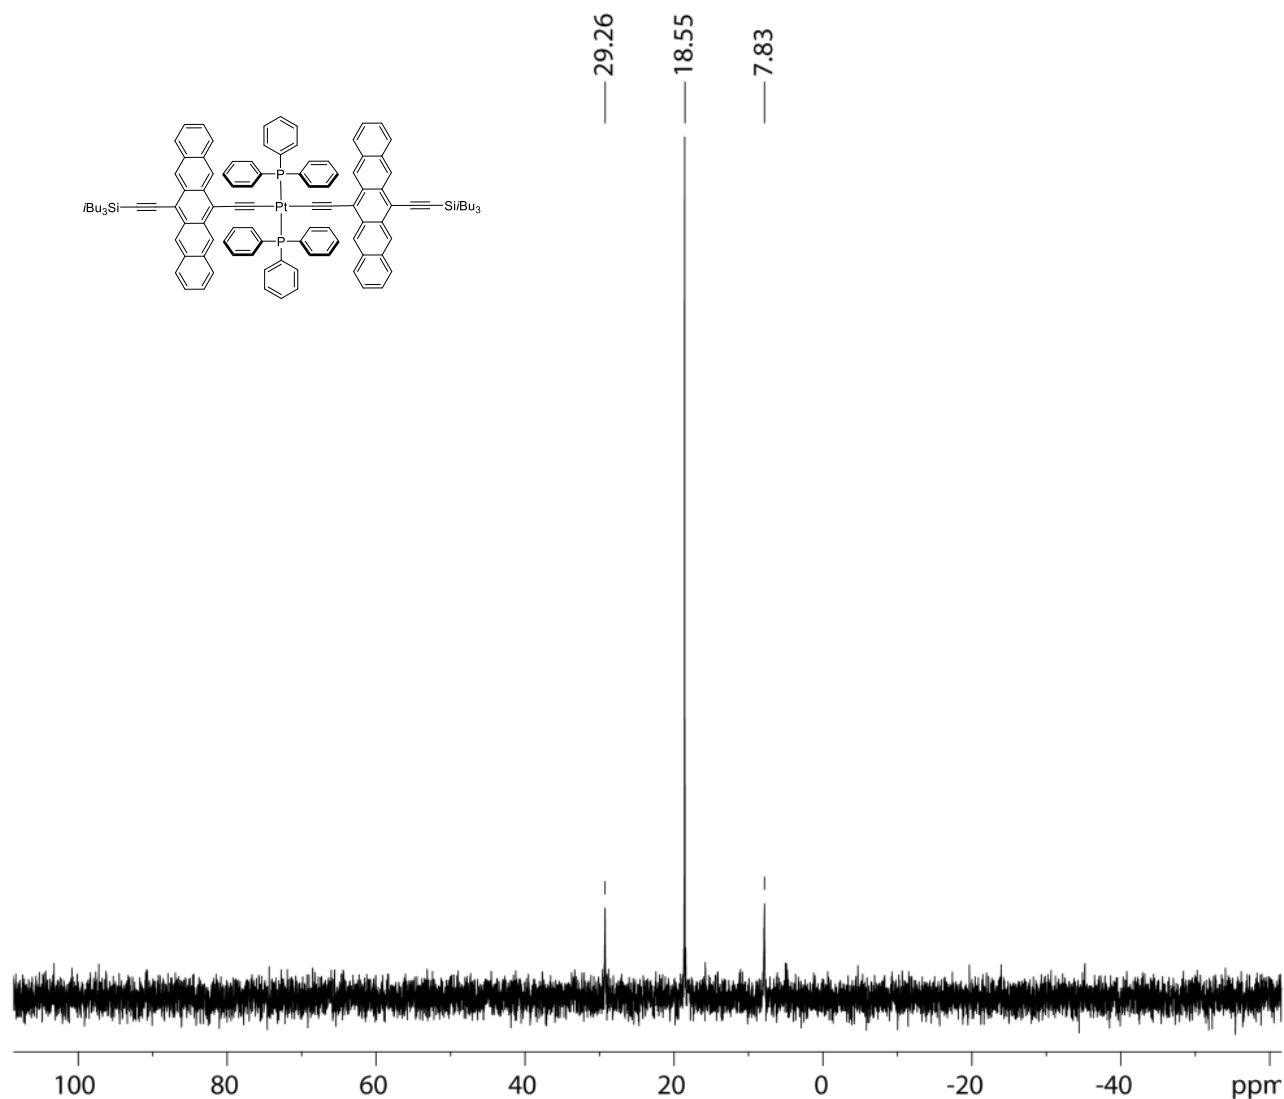

**Figure S5.**  $^{31}\text{P}$  NMR spectrum of compound *trans*-Pt (121 MHz,  $\text{CD}_2\text{Cl}_2$ , rt).

Z:\net47182\_1BCM\_E1\_FTals

#47182/HETZER/CRH239/CDCl3/13C/RT/NOSPIN/CHP

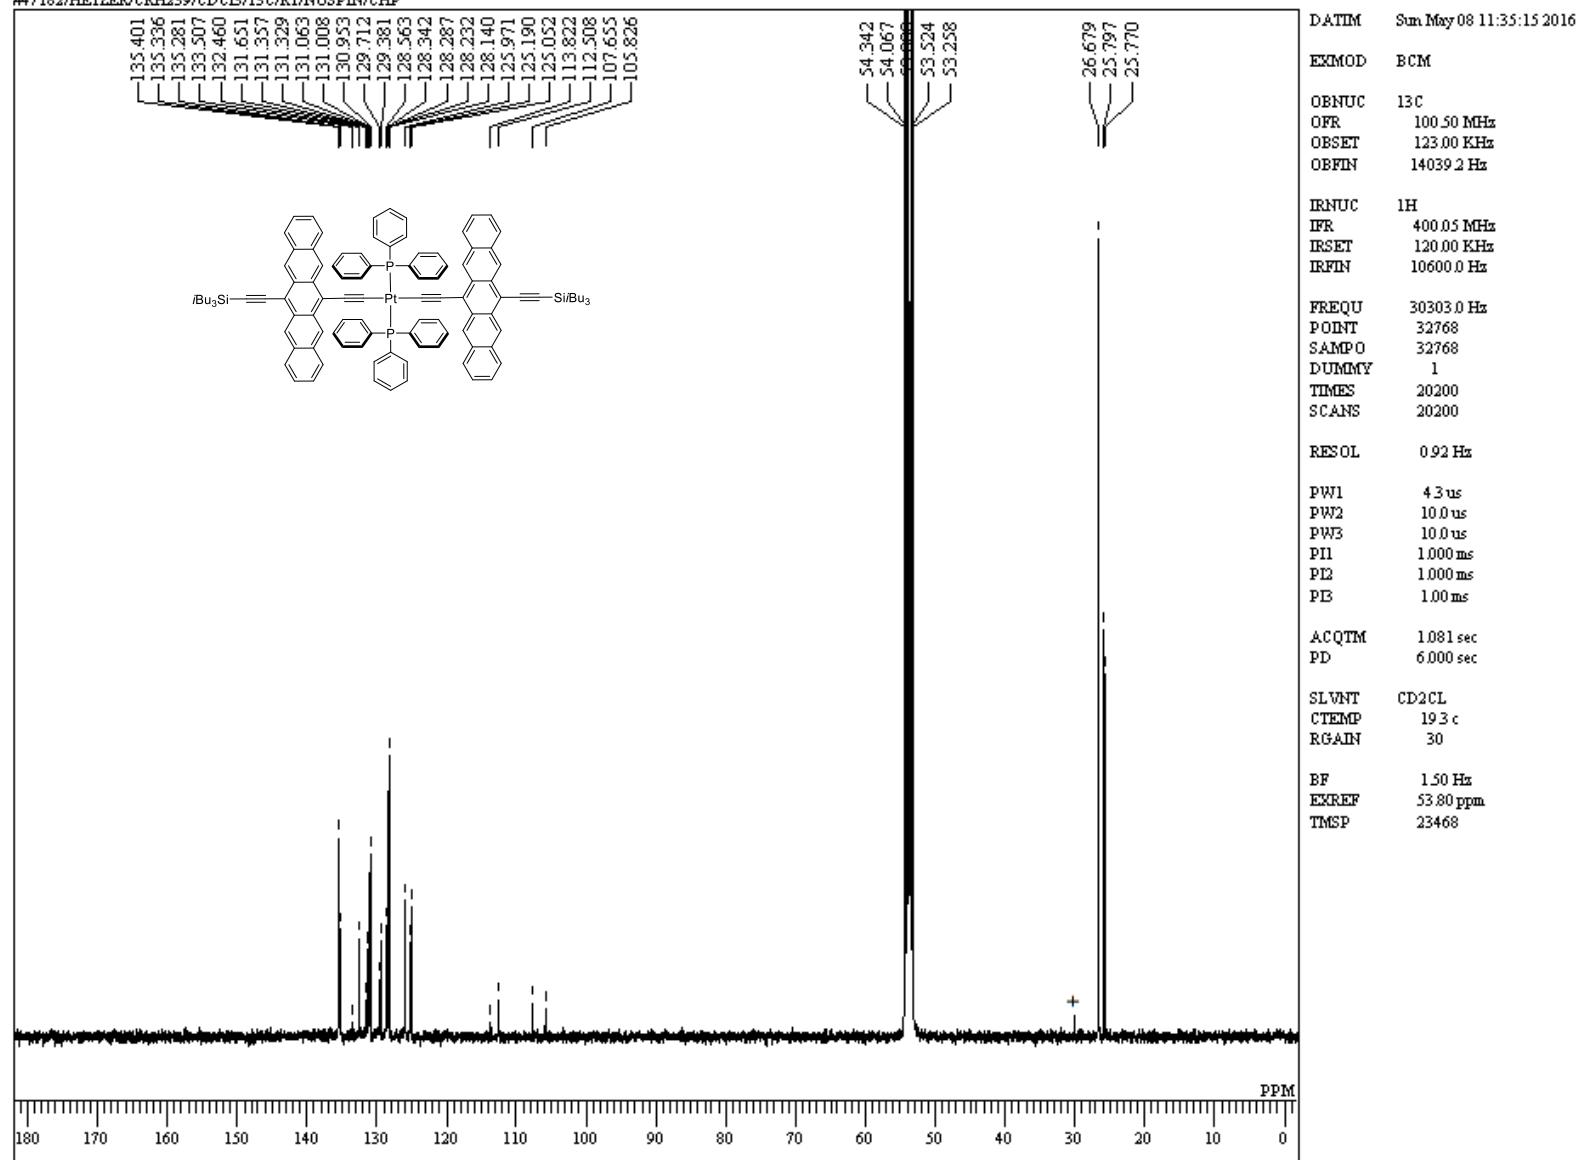

Figure S6.  $^{13}\text{C}$  NMR spectrum of compound *trans*-Pt (100 MHz,  $\text{CD}_2\text{Cl}_2$ , rt, + = hexanes).



CRH272

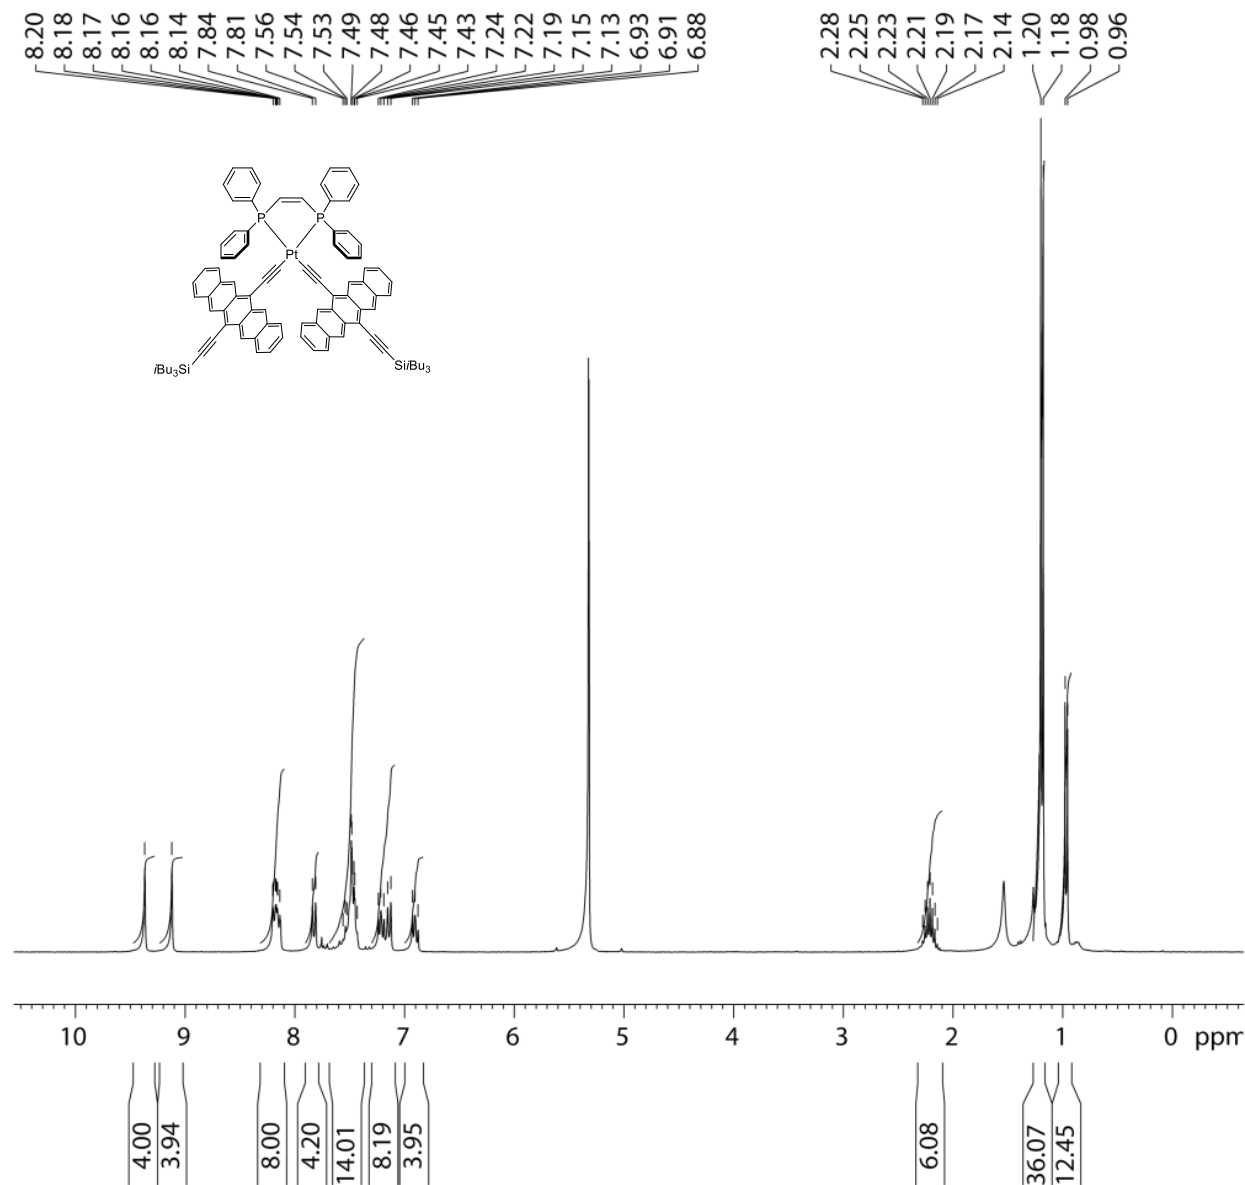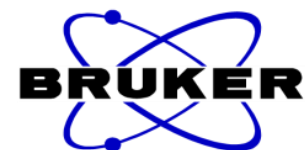

NAME 3ch98628h  
 EXPNO 1  
 PROCNO 1  
 Date\_ 20160909  
 Time 15.24  
 INSTRUM spect  
 PROBHD 5 mm QNP 1H/1  
 PULPROG zg30  
 TD 65536  
 SOLVENT CDCl3  
 NS 8  
 DS 2  
 SWH 6172.839 Hz  
 FIDRES 0.094190 Hz  
 AQ 5.3084660 sec  
 RG 362  
 DW 81.000 usec  
 DE 9.00 usec  
 TE 300.0 K  
 D1 2.00000000 sec

===== CHANNEL f1 =====  
 NUC1 1H  
 P1 24.00 usec  
 PL1 0.00 dB  
 SFO1 300.1318534 MHz  
 SI 32768  
 SF 300.1305861 MHz  
 WDW EM  
 SSB 0  
 LB 0.30 Hz  
 GB 0  
 PC 0.70

Figure S7. <sup>1</sup>H NMR spectrum of compound *cis*-Pt (300 MHz, CD<sub>2</sub>Cl<sub>2</sub>, rt).

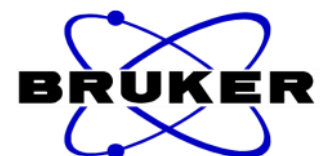

NAME 3ch98628p  
EXPNO 1  
PROCNO 1  
Date\_ 20160909  
Time 15.28  
INSTRUM spect  
PROBHD 5 mm QNP 1H/1  
PULPROG zgpg30  
TD 65536  
SOLVENT CDCl3  
NS 64  
DS 4  
SWH 48661.801 Hz  
FIDRES 0.742520 Hz  
AQ 0.6734324 sec  
RG 23170.5  
DW 10.275 usec  
DE 9.00 usec  
TE 300.0 K  
D1 2.0000000 sec  
D11 0.03000000 sec  
D12 0.00002000 sec

===== CHANNEL f1 =====  
NUC1 31P  
P1 7.00 usec  
PL1 15.00 dB  
SFO1 121.4886262 MHz

===== CHANNEL f2 =====  
CPDPRG2 waltz16  
NUC2 1H  
PCPD2 115.00 usec  
PL2 0.00 dB  
PL12 23.00 dB  
PL13 25.00 dB  
SFO2 300.1312005 MHz  
SI 32768  
SF 121.4948309 MHz  
WDW EM  
SSB 0  
LB 1.00 Hz  
GB 0  
PC 1.40

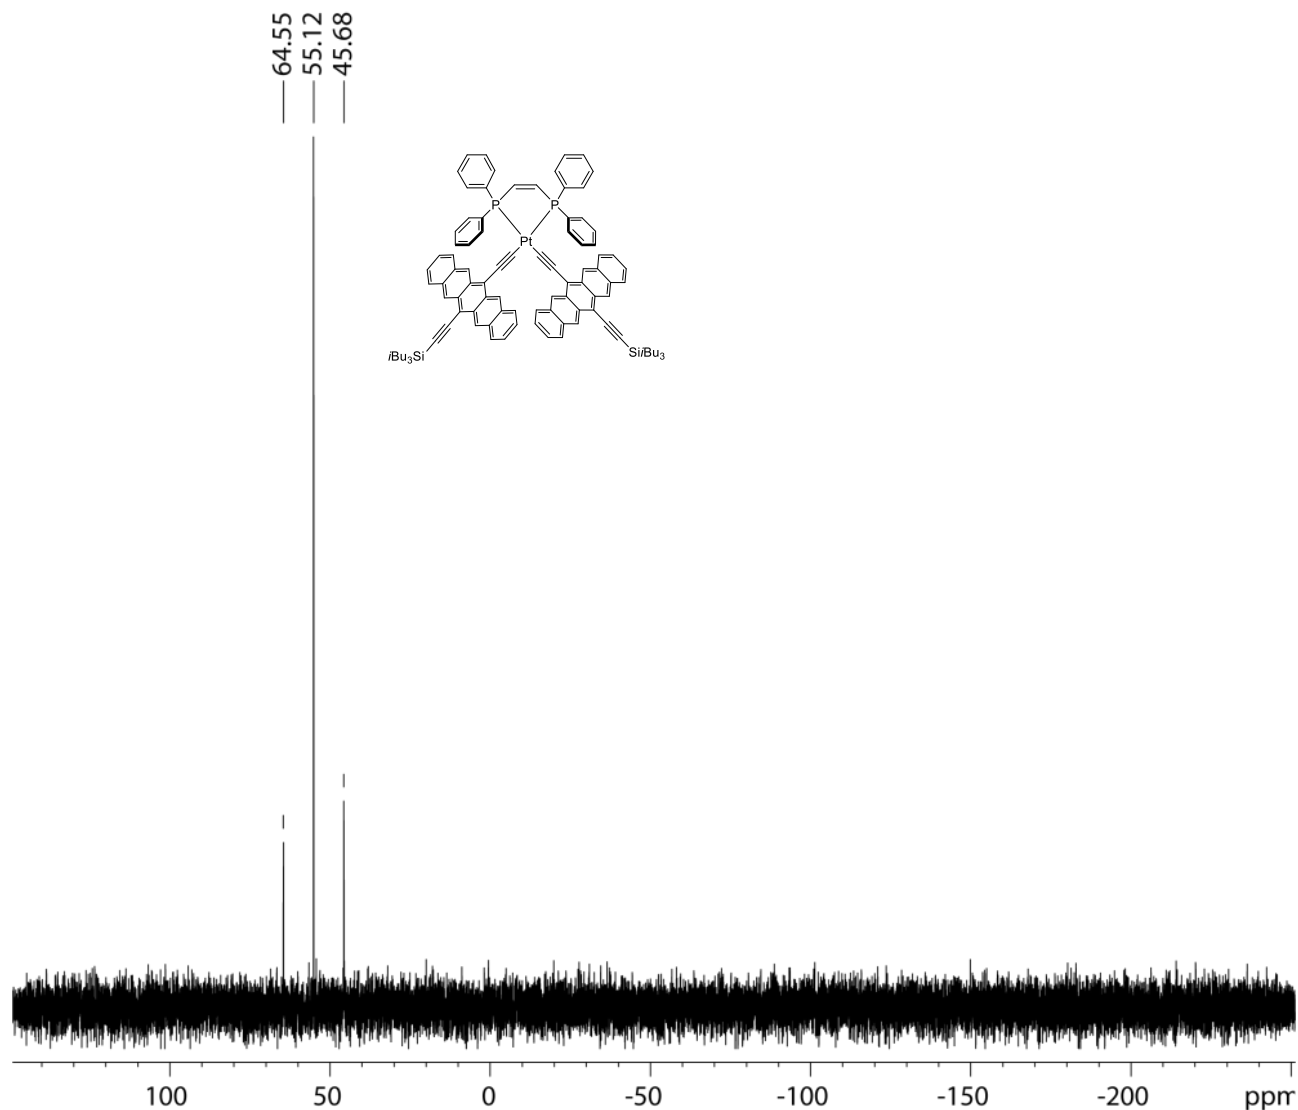

**Figure S8.** <sup>31</sup>P NMR spectrum of compound *cis*-Pt (121 MHz, CD<sub>2</sub>Cl<sub>2</sub>, rt).

C:\WINNMR98\Data\het47646c.ALS

#47646/HETZER/CRH272/CD2CL2/13C/RT/Nosph/CHP

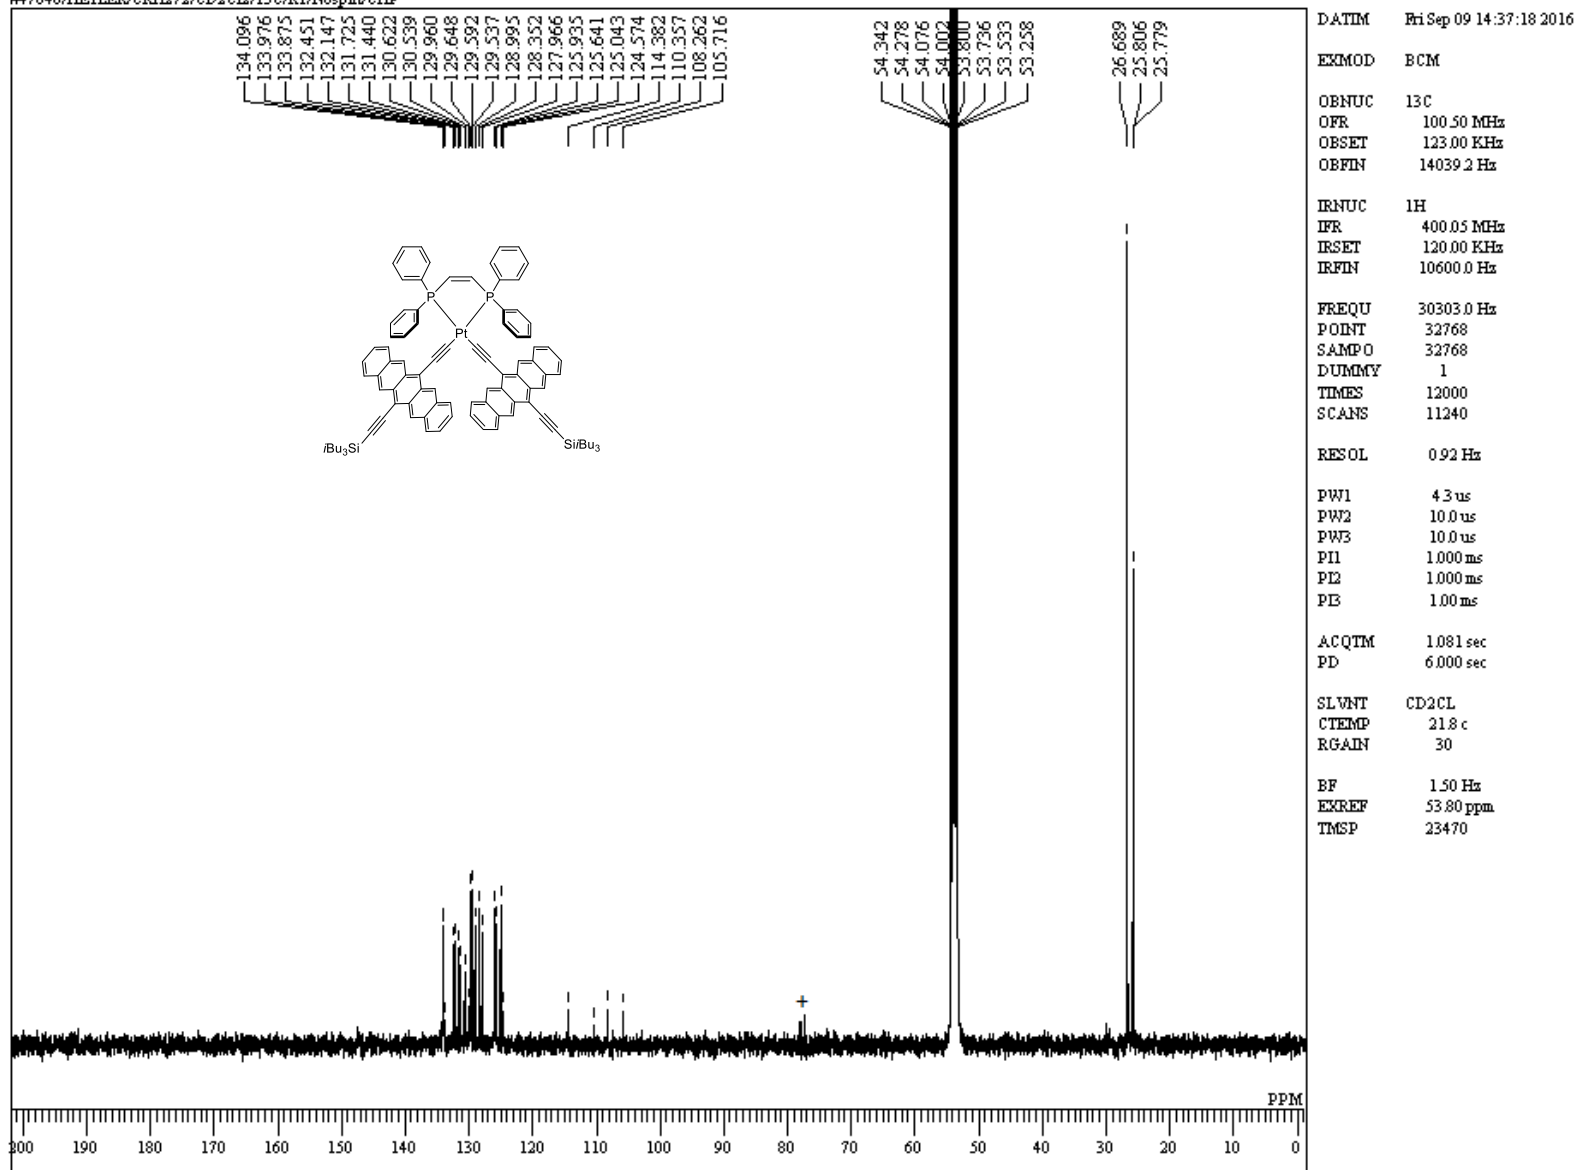

Figure S9.  $^{13}\text{C}$  NMR spectrum of compound *cis*-Pt (100 MHz,  $\text{CD}_2\text{Cl}_2$ , rt, + =  $\text{CDCl}_3$ ).

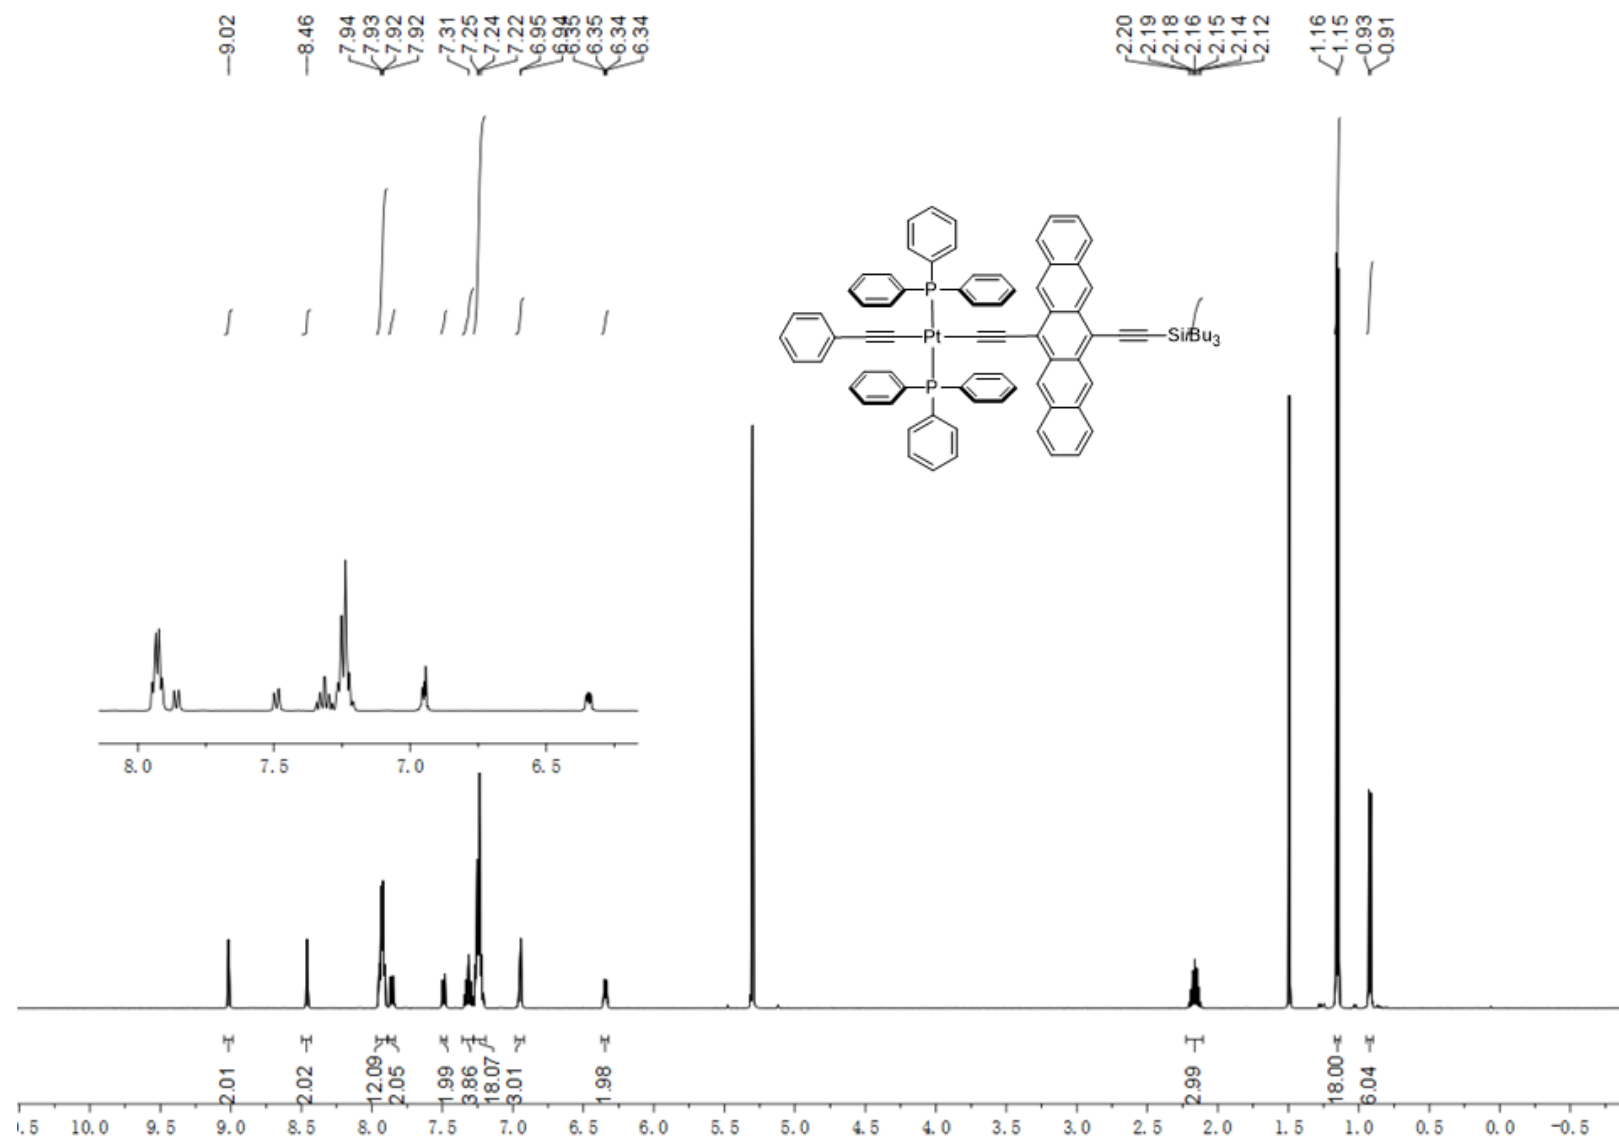

**Figure S10.** <sup>1</sup>H NMR spectrum of compound **mono-Pt** (500 MHz, CD<sub>2</sub>Cl<sub>2</sub>, rt).

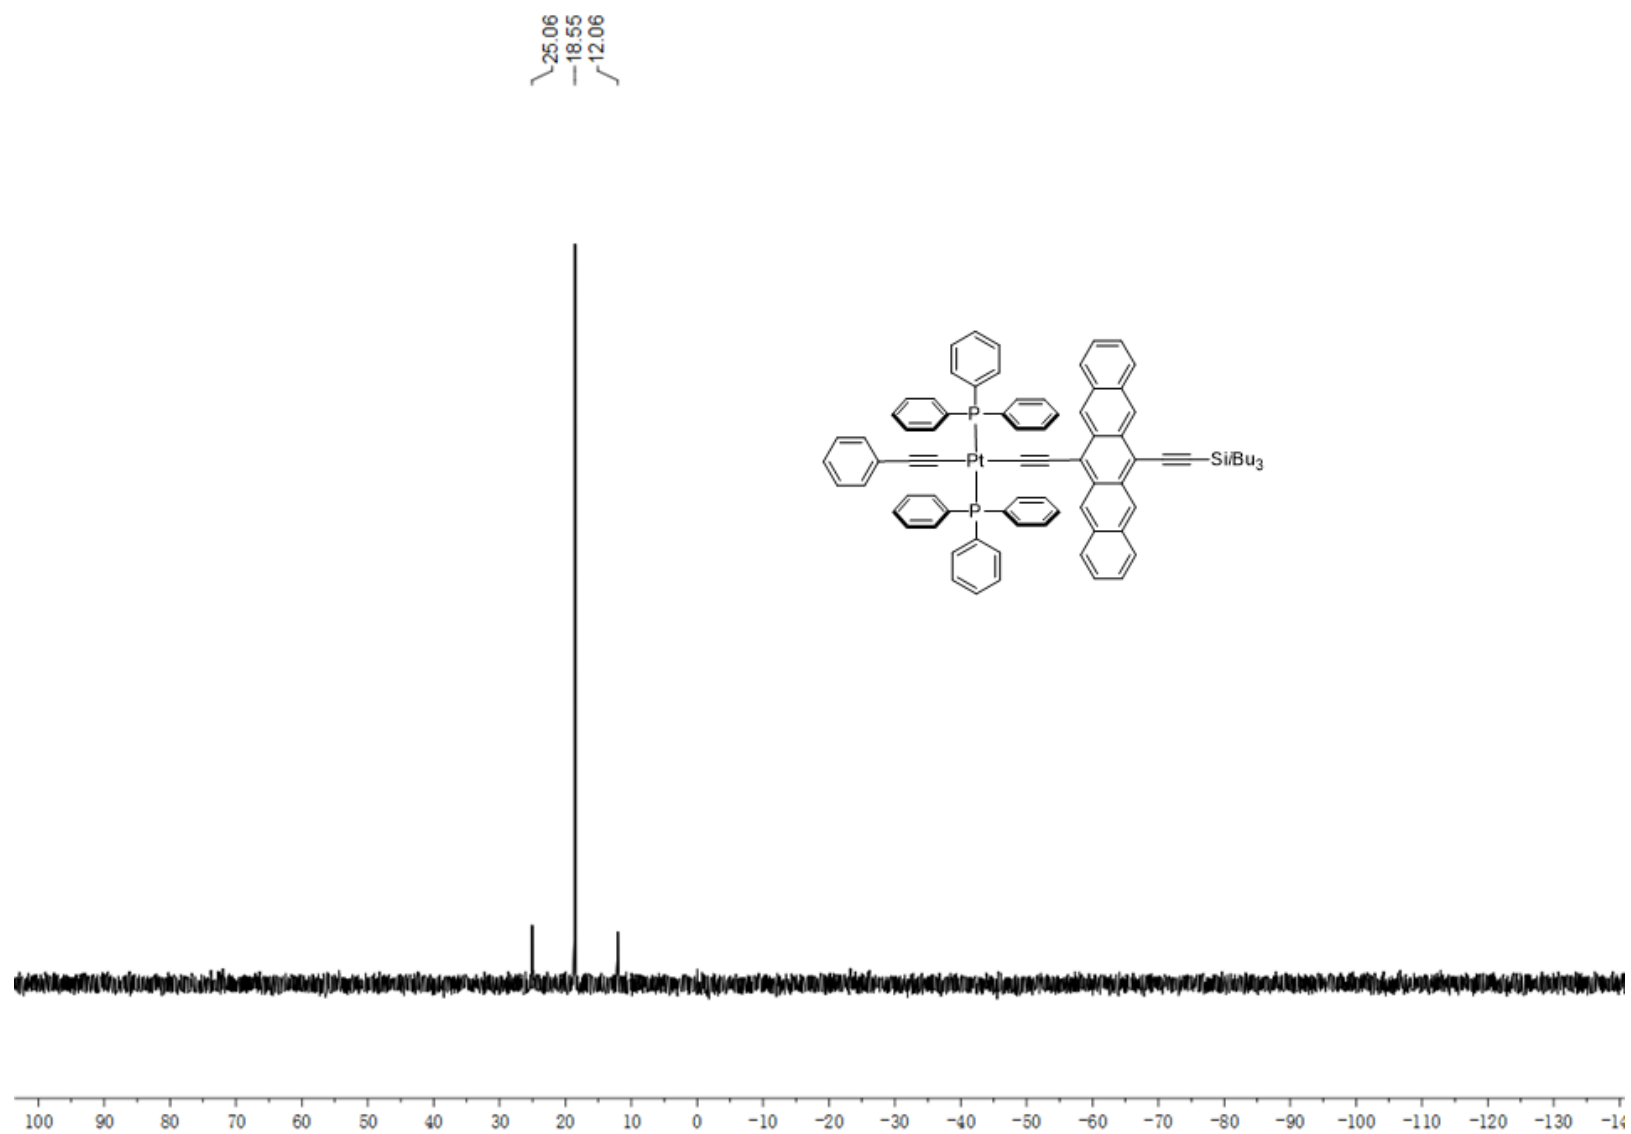

**Figure S11.**  $^{31}\text{P}$  NMR spectrum of compound **mono-Pt** (202 MHz,  $\text{CD}_2\text{Cl}_2$ , rt).

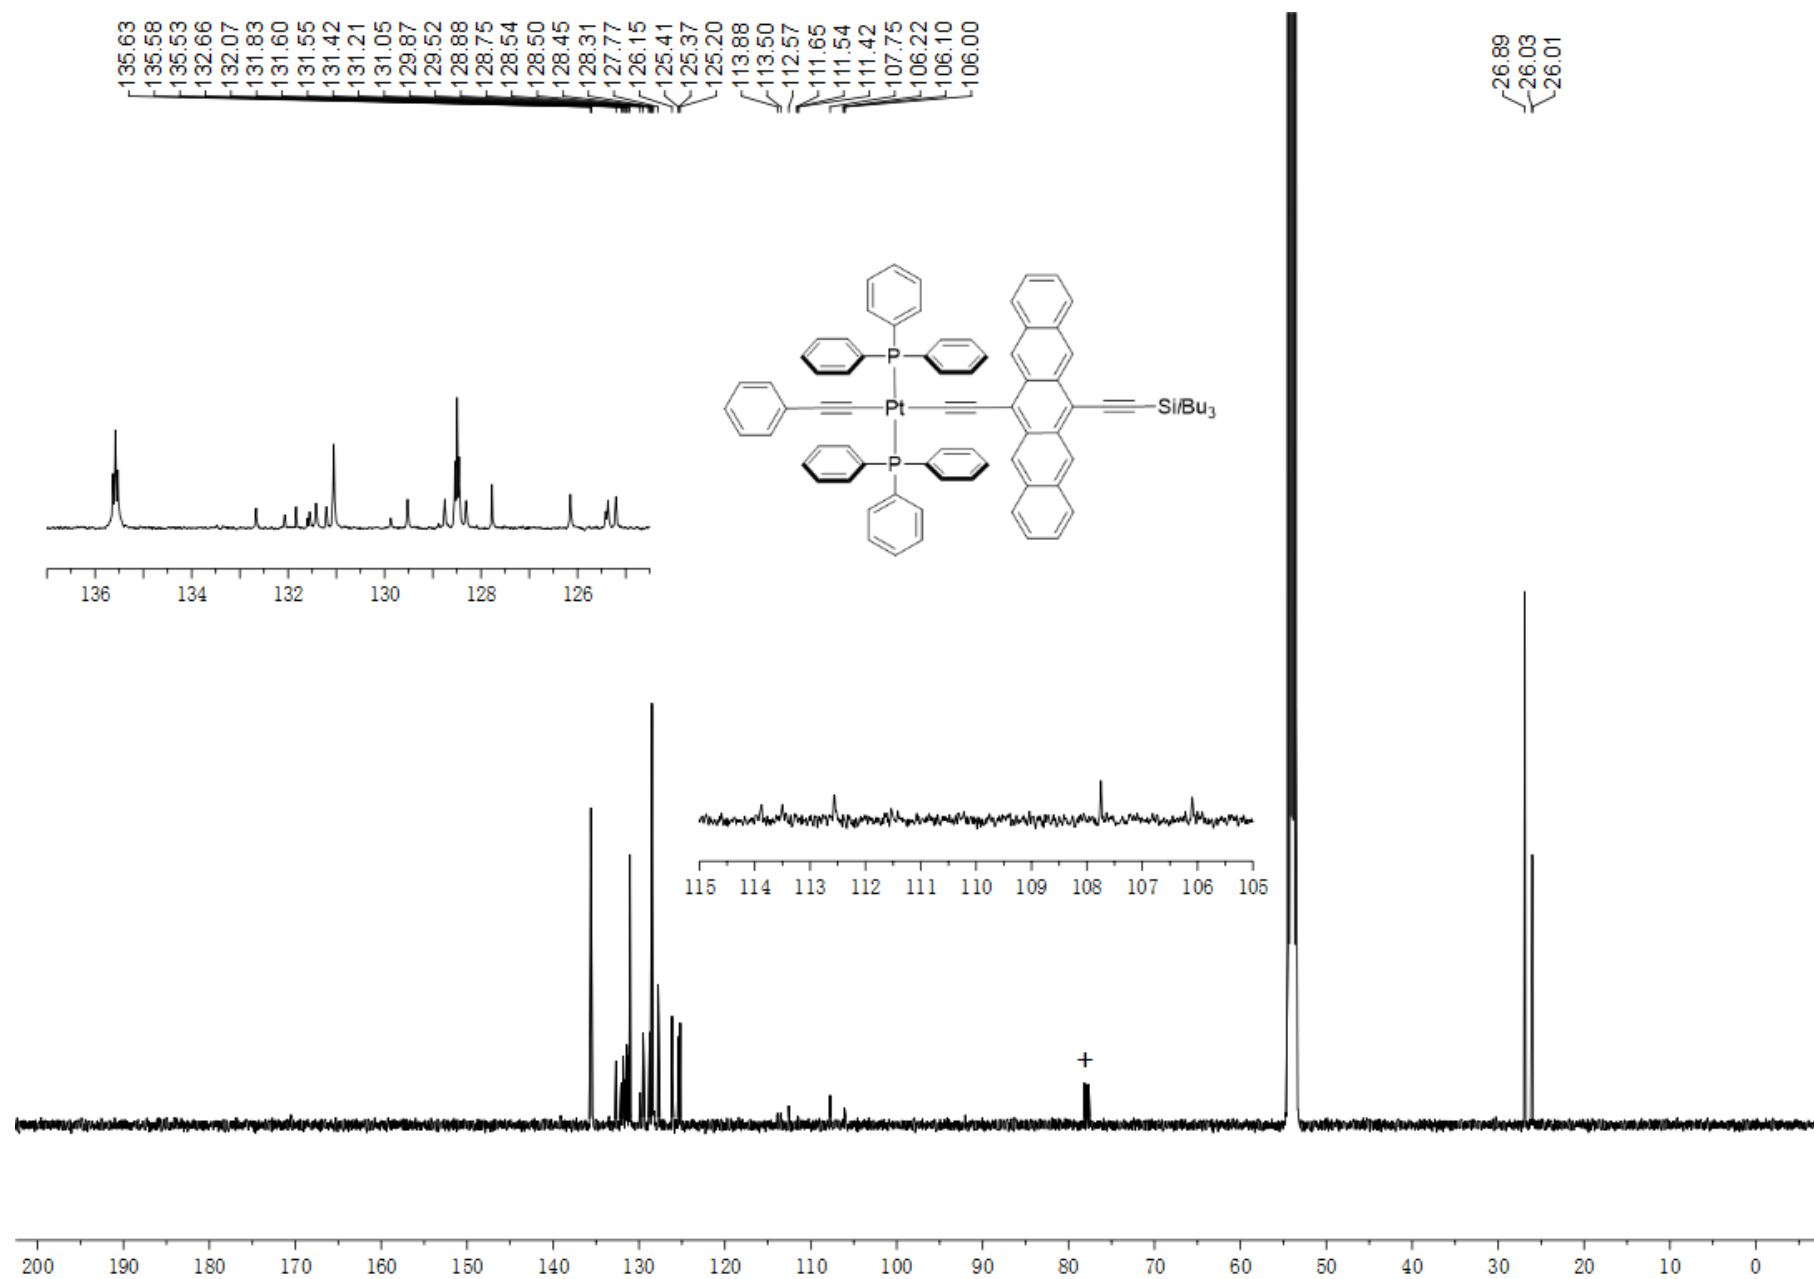

**Figure S12.** <sup>13</sup>C NMR spectrum of compound **mono-Pt** (126 MHz, CD<sub>2</sub>Cl<sub>2</sub>, rt, + = CDCl<sub>3</sub>).

# Supplemental photophysical characterization

## Analysis methods of the transient data

### Analysis of the TA data with sequential global analysis

All fs- and nsTA data were corrected for scattered light, time-zero and for probe chirp. All TA data were fit by global analysis using a sequential model.

### Analysis of the fsIR data

All fsIR data were corrected for minor wavelengths shifts ( $\sim 10\text{ cm}^{-1}$ ) using the FTIR data as a reference. All fsIR data were fit by global analysis using a sequential model analogously to the analysis of the TA data.

### Calculation of the triplet quantum yields

Triplet quantum yields were determined by assuming that neither equilibria nor parallel occurring transient species play a significant role for *cis-Pt* or *trans-Pt*.<sup>19</sup>

Following the Beer–Lambert law, the ratio of the  $\Delta\text{OD}$  values in the EAS of the individual transient species at a wavelength, where the extinction coefficients are equal for the individual transient species is equal to the relative concentration ratio of the corresponding transient species.<sup>19</sup>

Usually, pentacene excited states (singlet and triplet) do not absorb in the transient absorption experiments, where the ground-state bleaching occurs (at around 660 nm). Therefore, the amplitude of the negative  $\Delta\text{OD}$  value in the transient spectroscopy data at the ground-state bleaching is a direct measure of the amount of excited states.<sup>20</sup>

As the potential energy surface of the pentacene ( $S_1$ ) is significantly distorted by the platinum linker in *cis-* and *trans-Pt*, it is, however, impossible to guarantee that ( $S_1$ ) is non-absorbing at around 660 nm. Therefore, we performed the precise quantum yield calculations with the fsIR data instead of the TA data. The shape and the position of the ground-state bleaching of the alkyne stretching region between 2000 and 2200  $\text{cm}^{-1}$  does not change for ( $S_1S_0$ ) and ( $T_1T_1$ ). Moreover, the ground-state bleaching strongly resembles the ground-state absorptions (see **Figures 5** and **S29**). This corroborates that the excited states do not possess absorptions at the ground-state bleaching in the fsIR data.

### Analysis of the TA data with target analysis

We established a kinetic model for global target analysis of the fsTA data of *trans-* and *cis-Pt* and applied this to the fsTA data measured in butyronitrile at RT in the visible. We used the triplet yields calculated from the fsIR measurements in DCM. As the majority of the  $^1(T_1T_1)$  states decays via the triplet channel of TTA (over  $^3(T_1T_1)$ ) to ( $T_1S_0$ ) and only a very small, undeterminable amount of ( $T_1+T_1$ ) is formed, we did not implement ( $T_1+T_1$ ) in the kinetic model. The lifetime of each state was first extracted from global analysis. For this purpose, the fsTA data was globally fit with 4 sequential transients: the singlet excited state ( $S_1S_0$ )\* before solvent relaxation, the singlet excited state ( $S_1S_0$ ) after solvent relaxation, the correlated triplet pair state with ( $T_1T_1$ ) and the decorrelated triplet state ( $T_1S_0$ ). As the ( $T_1S_0$ ) lifetime is too long for a meaningful extraction from the fsTA data, it was extracted from a global analysis of the corresponding nsTA data. The optimized lifetimes were then used in global target analyses, while the individual rates for specific deactivation channels were allowed to vary. The fit was deemed satisfactory when the species-associated spectra of ( $T_1T_1$ ) possessed about double the intensity of ( $T_1S_0$ ) at the prominent pentacene triplet absorptions in the range from 450 to 525 nm (as the number of absorbing triplets is halved). It was not possible to include delayed fluorescence in this model, as the low fluorescence quantum yields of *trans-* and *cis-Pt* ( $\ll 1\%$ ) preclude a determination of a possible rate for this process.

The fsTA data were corrected for scattered light, time-zero and for probe chirp before target analysis.

### **Analysis of the TREPR data**

The TCW spectra were corrected for pre-time zero, DC offsets, magnetic field independent background and phase. The spectra were fit with a linear combination of spin polarized triplet spectra generated using the 'pepper' function in EasySpin.



## Supplemental photophysical data

### Supplemental steady-state characterization

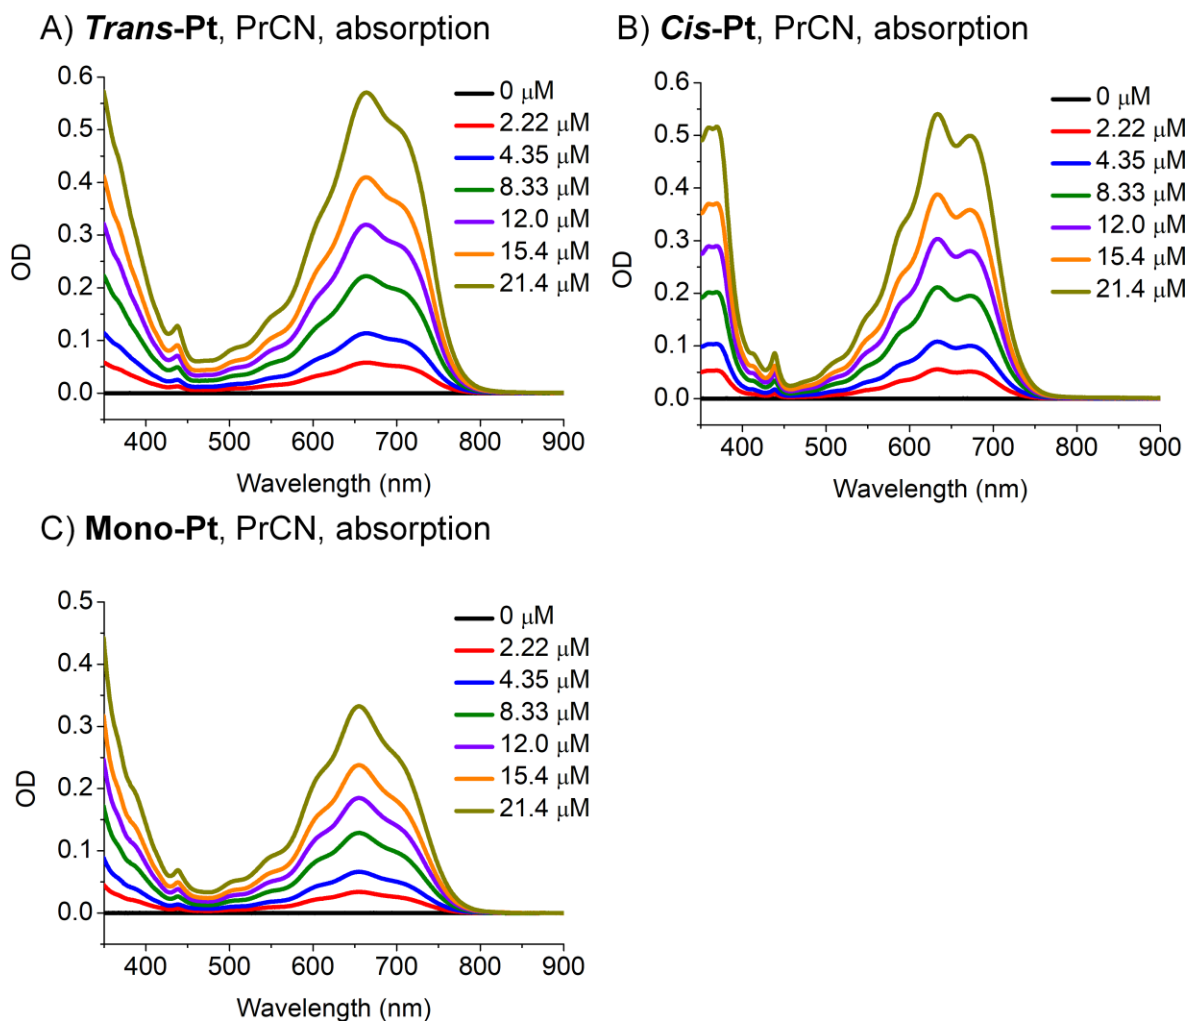

**Figure S13: Concentration-dependent steady-state absorption spectra of *trans*-, *cis*-, mono-Pt.** Measured in butyronitrile (PrCN) at room temperature at various concentrations.

A) *Trans*-Pt.

B) *Cis*-Pt.

C) Mono-Pt.

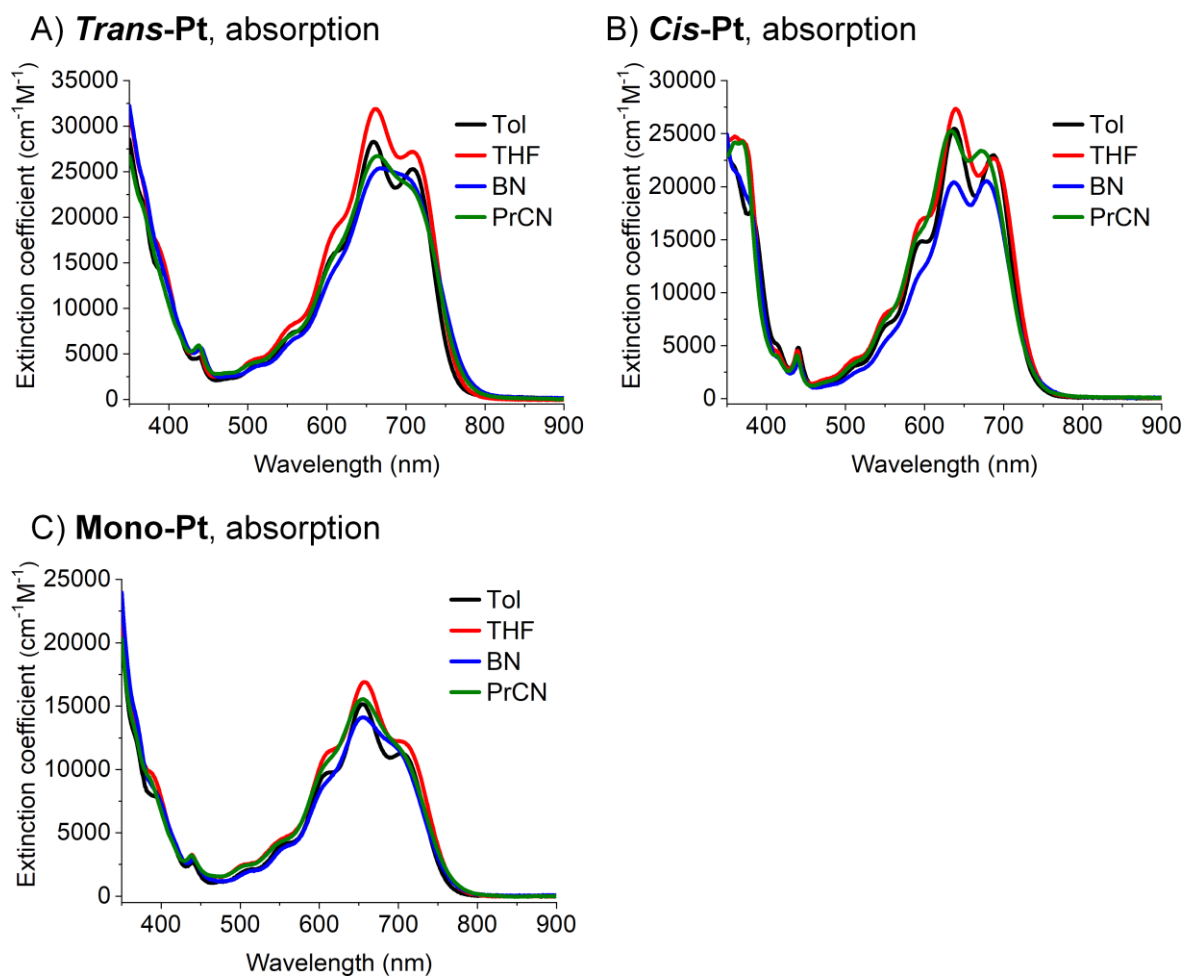

**Figure S14: Polarity-dependent steady-state absorption spectra of *trans*-, *cis*-, mono-Pt.** Measured at room temperature in various solvents of different polarity: toluene (Tol), THF, benzonitrile (BN) and butyronitrile (PrCN).  
A) *Trans*-Pt.  
B) *Cis*-Pt.  
C) Mono-Pt.

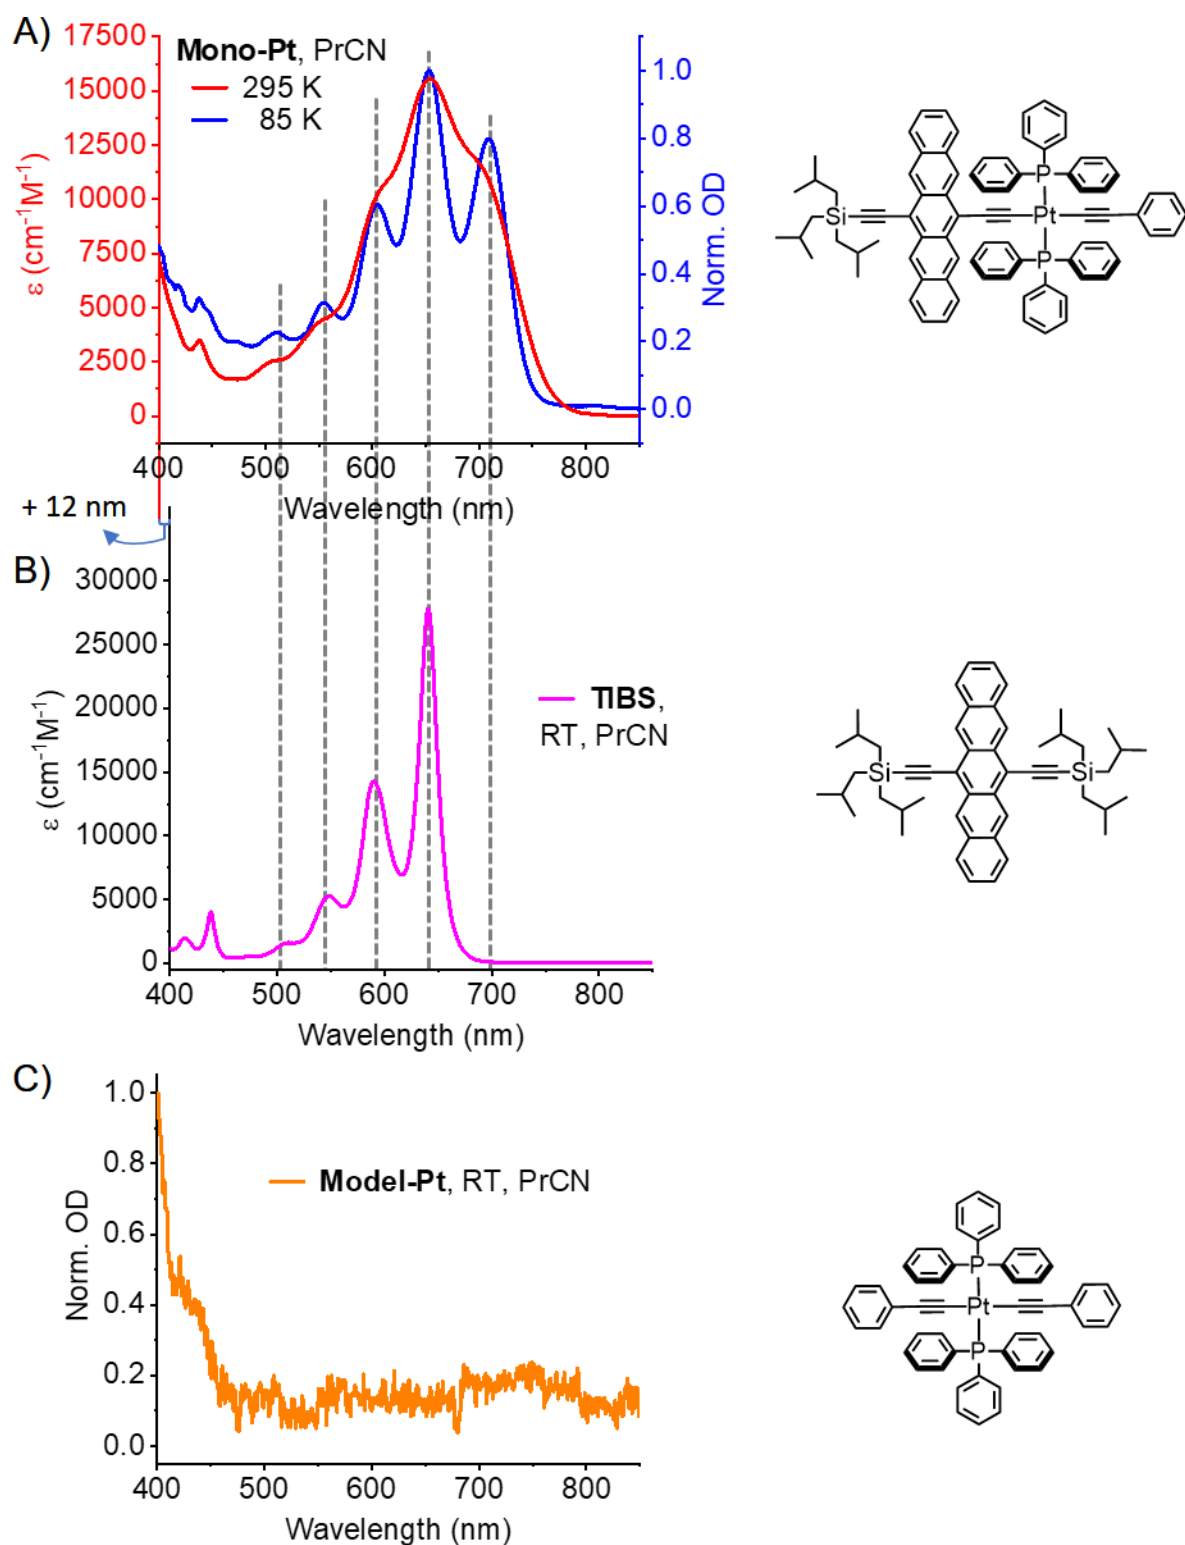

**Figure S15: Comparison of the steady-state absorption spectra of mono-Pt, TIBS and model-Pt.**

Correlation lines are drawn between A) and B) to demonstrate the significant distortions of the pentacene potential energy surface by the platinum atom.

A) **Mono-Pt** measured at room temperature and at 85 K in butyronitrile.

B) **TIBS** measured at room temperature in butyronitrile.

C) **Model-Pt** measured at room temperature in butyronitrile.

**Table S1. Vibronic maxima of the  $S_1 \leftarrow S_0$  transition maximum in butyronitrile.**

| Molecule        | 0-*4 transition    | 0-*3 transition    | 0-*2 transition    | 0-*1 transition    | 0-*0 transition    |
|-----------------|--------------------|--------------------|--------------------|--------------------|--------------------|
| <b>Mono-Pt</b>  | 510 nm/<br>2.43 eV | 553 nm/<br>2.24 eV | 604 nm/<br>2.05 eV | 652 nm/<br>1.90 eV | 709 nm/<br>1.75 eV |
| <b>Trans-Pt</b> | 510 nm/<br>2.43 eV | 555 nm/<br>2.23 eV | 608 nm/<br>2.04 eV | 658 nm/<br>1.88 eV | 715 nm/<br>1.73 eV |
| <b>Cis-Pt</b>   | 510 nm/<br>2.43 eV | 553 nm/<br>2.24 eV | 592 nm/<br>2.09 eV | 640 nm/<br>1.94 eV | 694 nm/<br>1.79 eV |
| Molecule        | 0-*3 transition    | 0-*2 transition    | 0-*1 transition    | 0-*0 transition    | ---                |
| <b>TIBS</b>     | 508 nm/<br>2.44 eV | 548 nm/<br>2.26 eV | 590 nm/<br>2.10 eV | 641 nm/<br>1.93 eV |                    |

**Table S2. Vibronic maxima of the  $S_2 \leftarrow S_0$  transition maximum in butyronitrile.**

| Molecule        | 0-*1 transition    | 0-*0 transition    |
|-----------------|--------------------|--------------------|
| <b>Mono-Pt</b>  | 419 nm/<br>2.96 eV | 438 nm/<br>2.83 eV |
| <b>Trans-Pt</b> | 413 nm/<br>3.00 eV | 437 nm/<br>2.84 eV |
| <b>Cis-Pt</b>   | 412 nm/<br>3.01 eV | 438 nm/<br>2.83 eV |
| <b>TIBS</b>     | 413 nm/<br>3.00 eV | 438 nm/<br>2.83 eV |

A) **Trans-Pt**, emission, Ex@610 nm

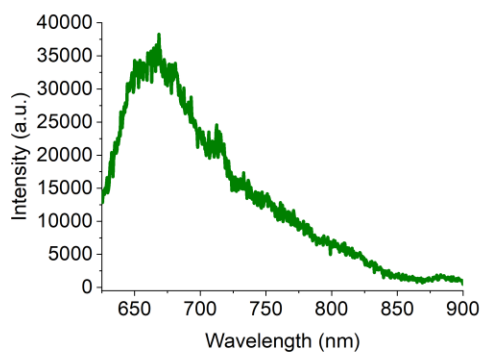

B) **Cis-Pt**, emission, Ex@610 nm

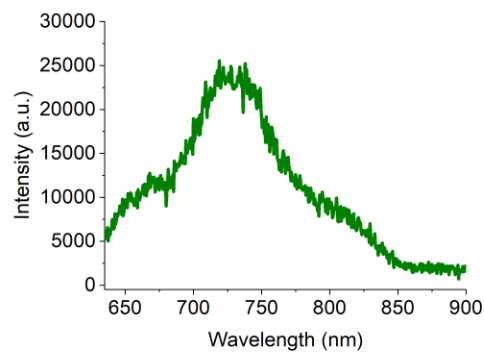

C) **Mono-Pt**, emission, Ex@610 nm

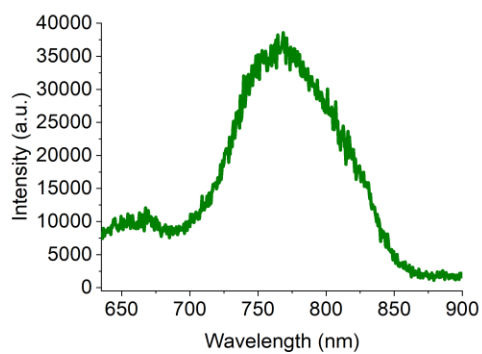

D) **Model-Pt**, emission, Ex@360 nm

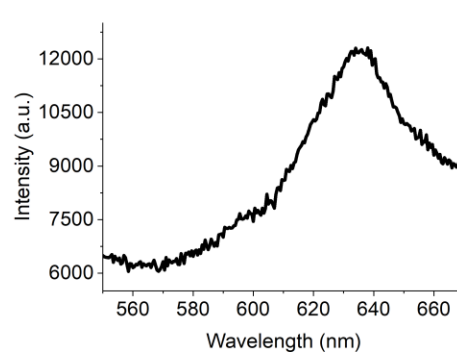

**Figure S16: Steady-state emission spectra of *trans*-, *cis*-, mono- and model-Pt.**

Measured in butyronitrile at room temperature.

A) **Trans-Pt**, excitation at 610 nm.

B) **Cis-Pt**, excitation at 610 nm.

C) **Mono-Pt**, excitation at 610 nm.

D) **Model-Pt**, excitation at 360 nm.

## Supplemental transient absorption data in butyronitrile

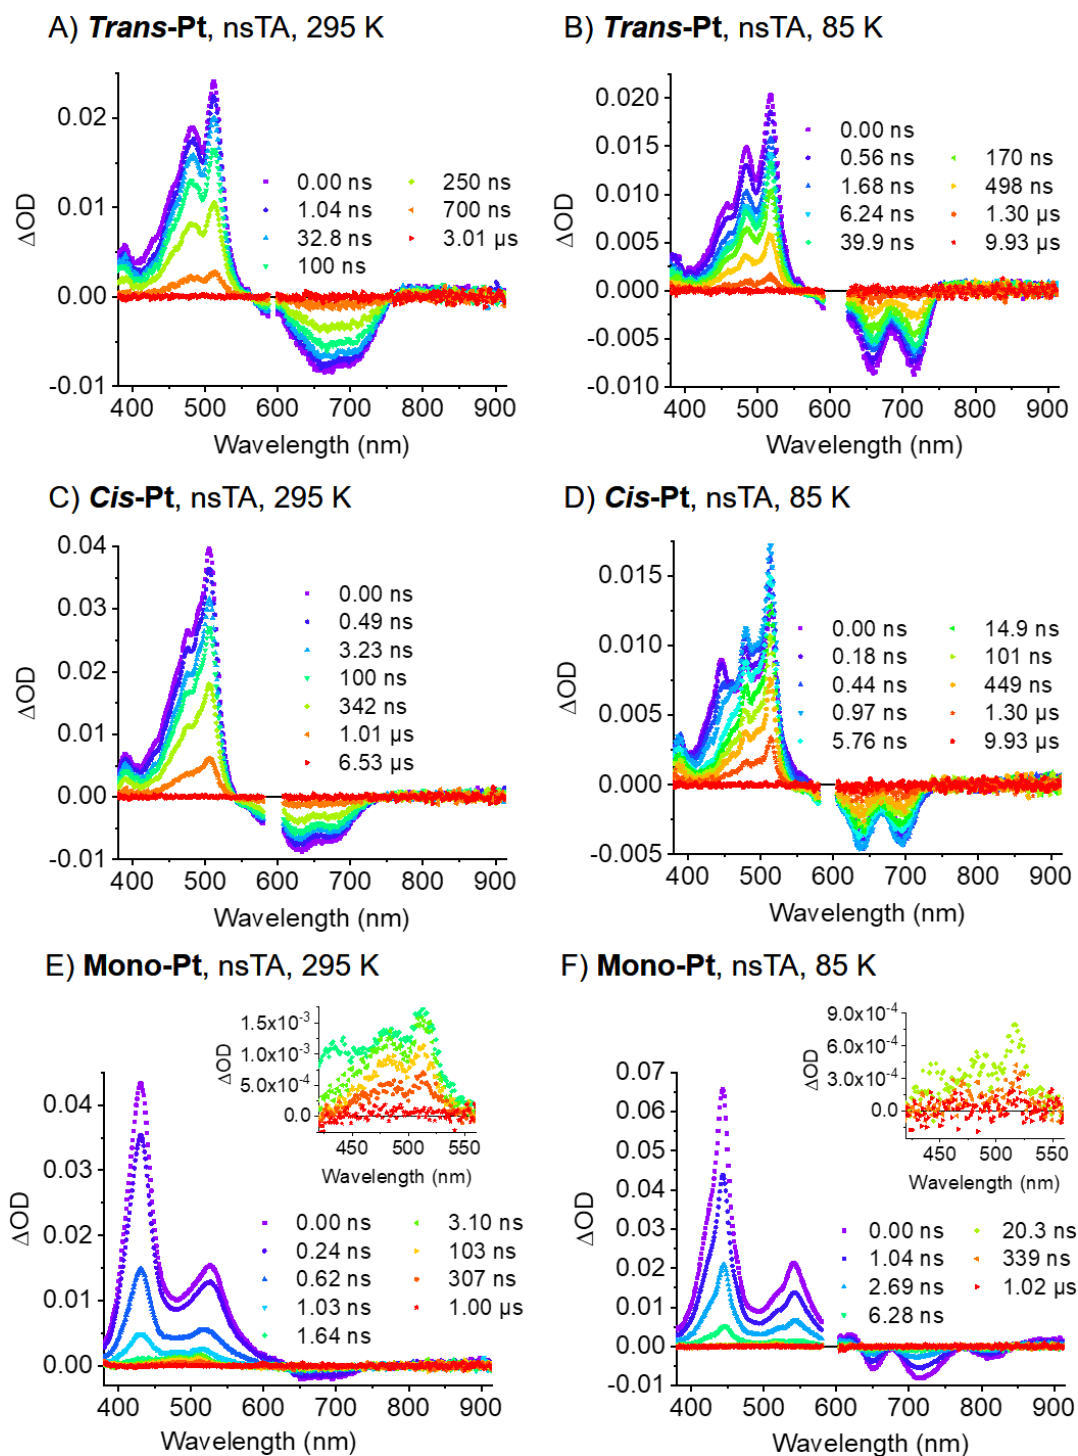

**Figure S17: Nanosecond transient absorption spectra of *trans*-, *cis*- and mono-Pt**

Measured at the specified temperature in oxygen-free butyronitrile.

A & B) ***Trans*-Pt** (295 K, excitation at 590 nm & 85 K, excitation at 610 nm).

C & D) ***Cis*-Pt** (295 K, excitation at 590 nm & 85 K, excitation at 590 nm).

E & F) **Mono-Pt** (295 K, excitation at 590 nm & 85 K, excitation at 590 nm).

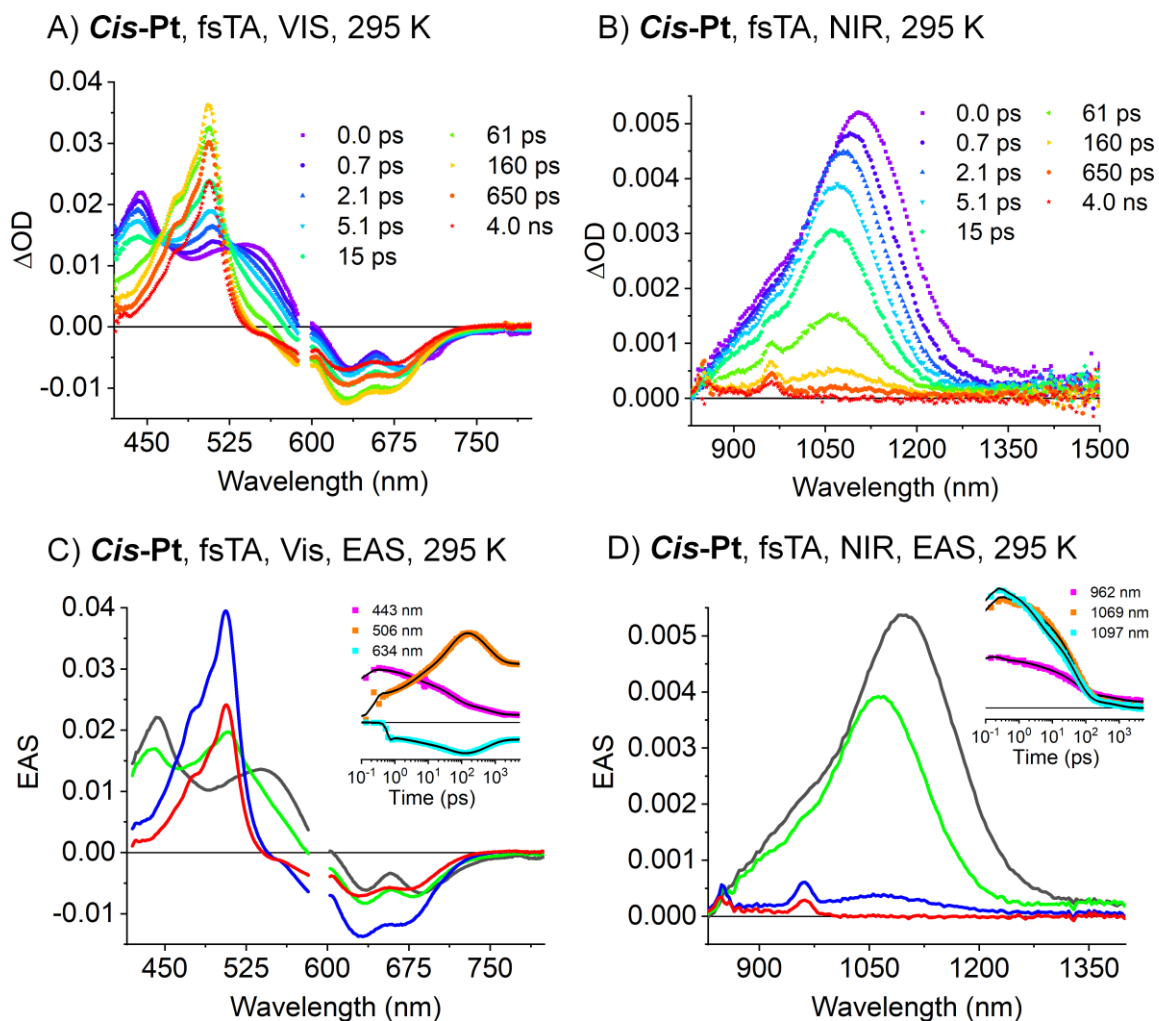

**Figure S18: Femtosecond transient absorption data of *cis*-Pt**

A & B) fsTA raw data of *cis*-Pt (VIS & NIR) measured in oxygen-free butyronitrile and at room temperature, excitation at 590 nm. C & D) EAS of the  $(S_0S_1)^*$  state before solvent relaxation (gray), the  $(S_0S_1)$  state after solvent relaxation (green), the correlated triplet pair state  $(T_1T_1)$  (blue) and the decorrelated triplet state  $(S_0T_1)$  (red) of *cis*-Pt obtained upon global analysis with a sequential model of TA data measured in oxygen-free butyronitrile at room temperature. C) *Cis*-Pt, visible. See A) for the raw data D) *Cis*-Pt, NIR. See B) for the raw data. Insets: Raw data single-wavelength kinetics and fits to the data

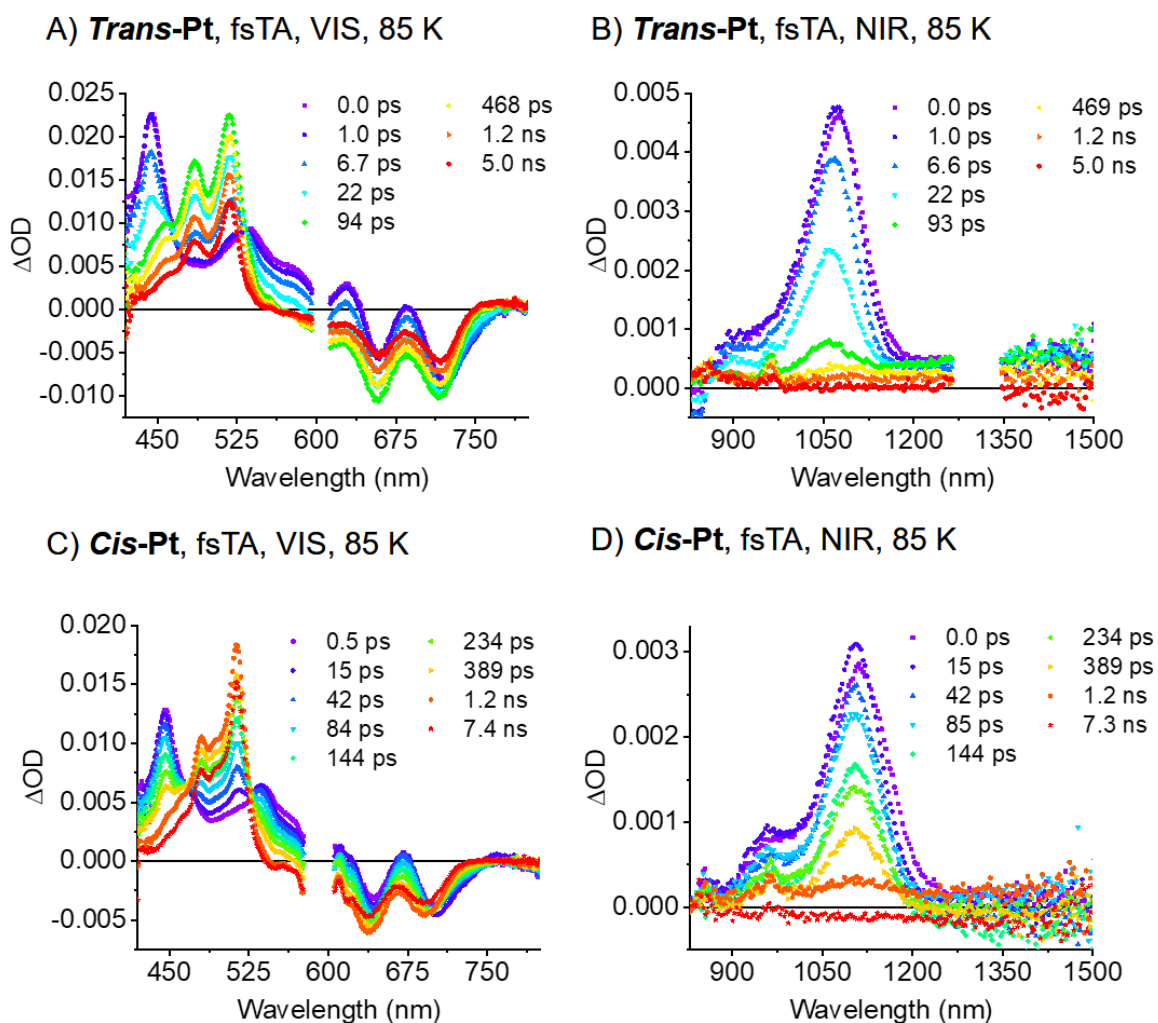

**Figure S19: Femtosecond transient absorption spectra of *trans*- and *cis*-Pt at cryogenic temperatures**

Measured in oxygen-free butyronitrile.

A & B) *Trans*-Pt (VIS & NIR) measured at 85 K, excitation at 610 nm.

C & D) *Cis*-Pt (VIS & NIR) measured at 85 K, excitation at 590 nm.



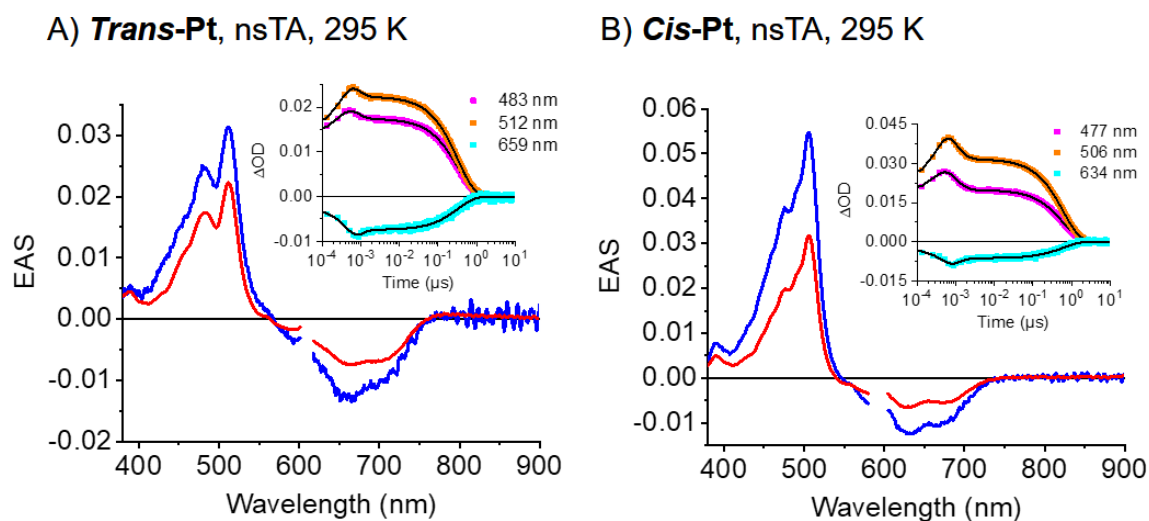

**Figure S20: Nanosecond transient absorption data of *trans*- and *cis*-Pt**

EAS of the correlated triplet pair state ( $T_1T_1$ ) (blue) and the decorrelation triplet state ( $T_1 + T_1$ ) or ( $S_0T_1$ ) (red) of *trans*- and *cis*-Pt. Obtained upon global analysis with a sequential model of nsTA data measured in oxygen-free butyronitrile at room temperature. See **Figure S17** for the raw data.

A) *Trans*-Pt.

B) *Cis*-Pt.

Insets: Raw data single wavelength kinetics and fits to the data.

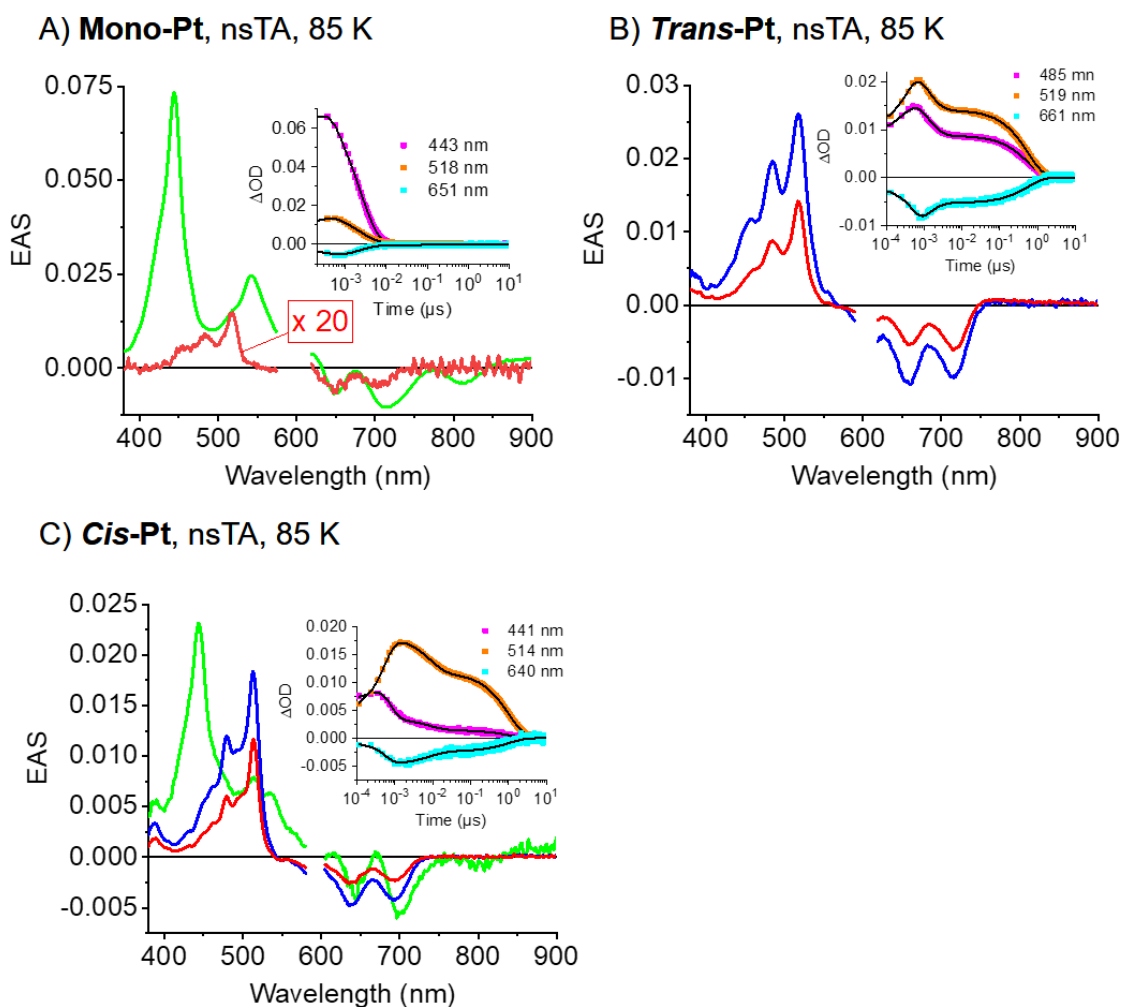

**Figure S21: Nanosecond transient absorption data of mono-, *trans*-, and *cis*-Pt at cryogenic temperatures**

EAS were obtained upon global analysis with a sequential model of nsTA data measured in oxygen-free butyronitrile at 85 K. See **Figure S17** for the raw data.

A) EAS of the singlet state  $S_1$  after relaxation (green) and the triplet state  $T_1$  (red) of **mono-Pt**.

B) EAS of the ( $S_0S_1$ ) state after relaxation (green), the correlated triplet pair state ( $T_1T_1$ ) (blue) and the decorrelation triplet state ( $T_1 + T_1$ ) or ( $S_0T_1$ ) (red) of ***trans*-Pt**.

C) EAS of the ( $S_0S_1$ ) state after relaxation (green), the correlated triplet pair state ( $T_1T_1$ ) (blue) and the decorrelation triplet state ( $T_1 + T_1$ ) or ( $S_0T_1$ ) (red) of ***cis*-Pt**.

Insets: Raw data single wavelength kinetics and fits to the data.

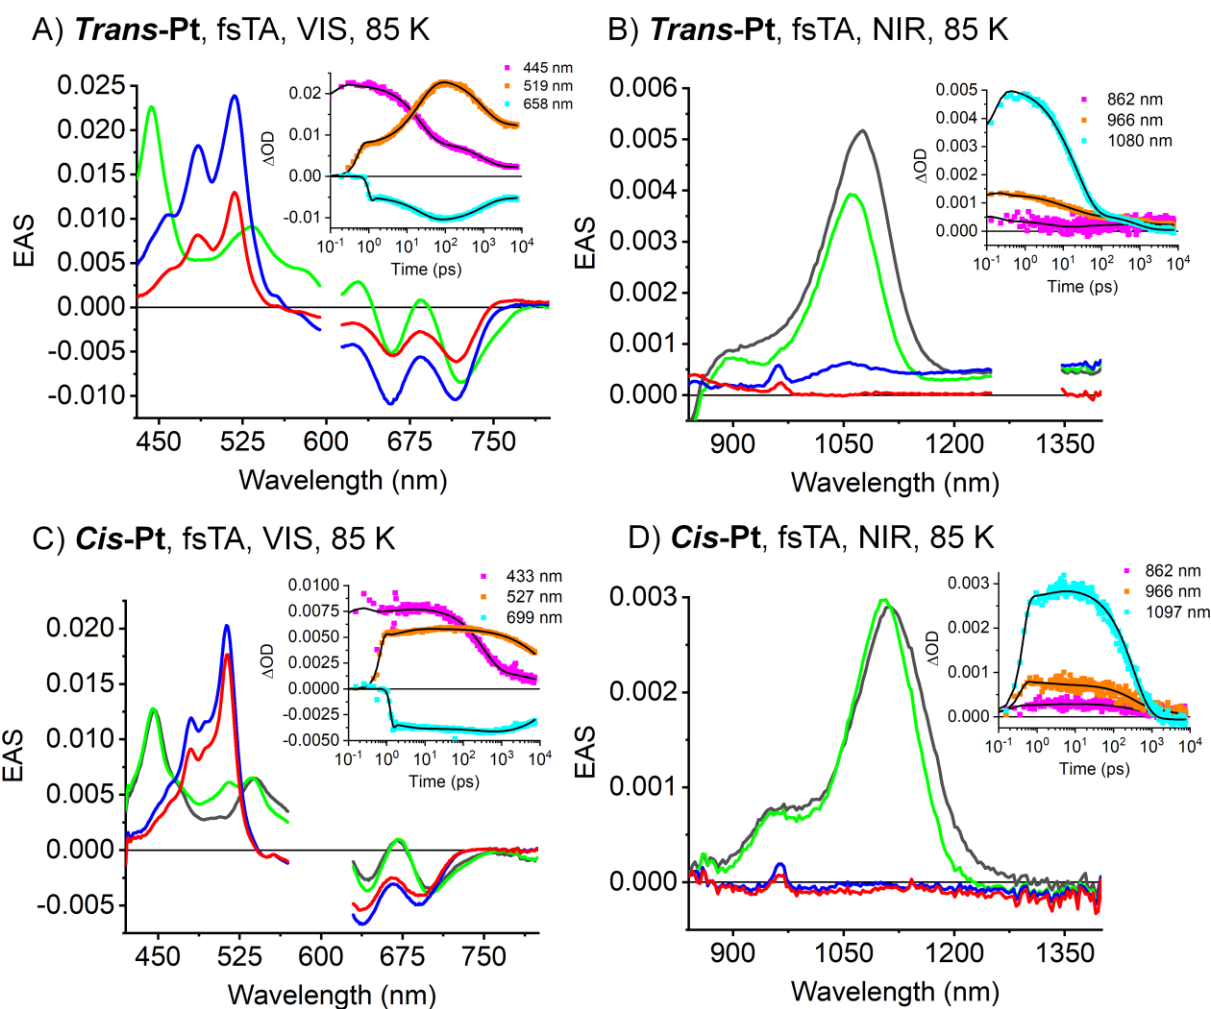

**Figure S22: Femtosecond transient absorption data of *trans*-, *cis*-Pt at cryogenic temperatures** EAS were obtained upon global analysis with a sequential model of fsTA data measured in oxygen-free butyronitrile at 85 K. See **Figure S19** for the raw data.

A) EAS of the ( $S_0S_1$ ) state after relaxation (green), the correlated triplet pair state ( $T_1T_1$ ) (blue) and the decorrelation triplet state ( $T_1 + T_1$ ) or ( $S_0T_1$ ) (red) of *trans*-Pt.

B) EAS of the ( $S_0S_1$ )<sup>\*</sup> state before relaxation (grey), EAS of the ( $S_0S_1$ ) state after relaxation (green), the correlated triplet pair state ( $T_1T_1$ ) (blue) and the decorrelation triplet state ( $T_1 + T_1$ ) or ( $S_0T_1$ ) (red) of *trans*-Pt.

C and D) EAS of the ( $S_0S_1$ )<sup>\*</sup> state before relaxation (grey), EAS of the ( $S_0S_1$ ) state after relaxation (green), the correlated triplet pair state ( $T_1T_1$ ) (blue) and the decorrelation triplet state ( $T_1 + T_1$ ) or ( $S_0T_1$ ) (red) of *cis*-Pt.

Insets: Raw data single wavelength kinetics and fits to the data.

**Table S3. Lifetimes of the transient states of mono-, *cis*- and *trans*-Pt in butyronitrile at 85 K.<sup>a, b</sup>**

| <b>Solvent</b>                                                        | <b>Mono-Pt</b> | <b><i>Cis</i>-Pt</b> | <b><i>Trans</i>-Pt</b> |
|-----------------------------------------------------------------------|----------------|----------------------|------------------------|
| (S <sub>1</sub> S <sub>0</sub> )                                      | ---            | 0.33 ± 0.02 ns       | 22 ± 1 ps              |
| S <sub>1</sub>                                                        | 2.34 ± 0.12 ns | ---                  | ---                    |
| (T <sub>1</sub> T <sub>1</sub> )                                      | ---            | 8.52 ± 0.43 ns       | 1.11 ± 0.06 ns         |
| (T <sub>1</sub> S <sub>0</sub> ) / (T <sub>1</sub> + T <sub>1</sub> ) | ---            | 1.02 ± 0.05 μs       | 556 ± 28 ns            |
| T <sub>1</sub>                                                        | 370 ± 19 ns    | ---                  | ---                    |

<sup>a</sup> See **Figures S21 and S22** for the global fits and **Figures S17 and S19** for the raw data.

## Global target analysis

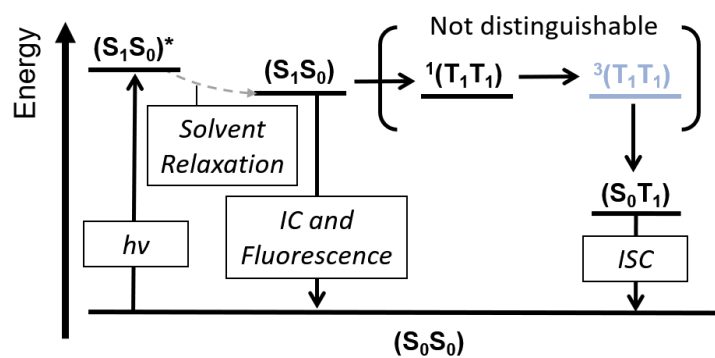

**Figure S23.** Kinetic model used to fit the fsTA data of *cis*- and *trans*-Pt in butyronitrile (PrCN) at RT via target analysis. As it was not possible to distinguish  $^1(T_1T_1)$  and  $^3(T_1T_1)$  in the TA data (see manuscript), only one correlated triplet pair species ( $T_1T_1$ ) could be implemented in the target analysis.

A) **Cis-Pt**, PrCN, fsTA, Vis, 295 K, target analysis

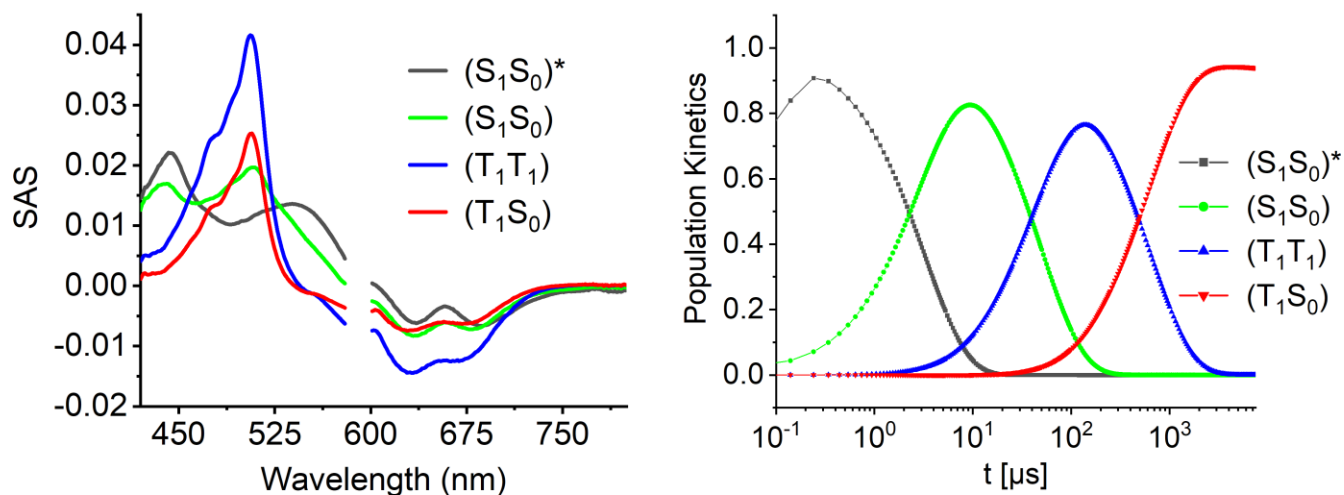

B) **Trans-Pt**, PrCN, fsTA, Vis, 295 K, target analysis

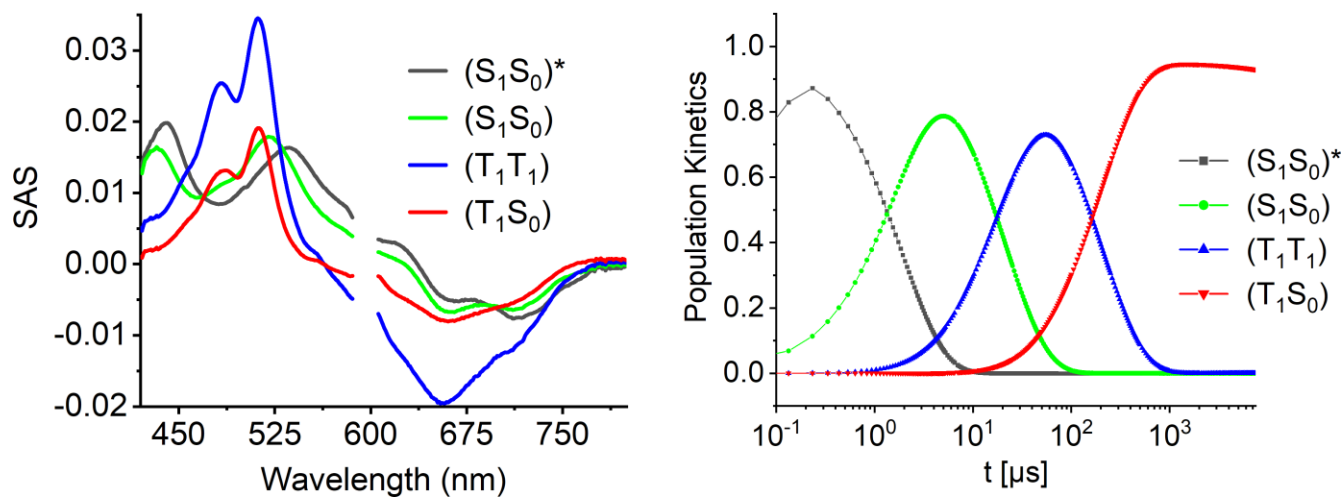

**Figure S24.** Species-associated spectra (SAS) and the corresponding population kinetics of the fsTA data of *cis*- and *trans*-Pt in oxygen-free butyronitrile (PrCN) as obtained by target analysis. See **Figure S23** for the kinetic model and **Table S4** for the used rate constants. The linear combination of each SAS on the left and the corresponding population kinetics on the right yields the complete 3-D TA data set ( $\Delta$ OD versus time and wavelength).

A) **Cis-Pt**, see **Figure S18** for the raw data

B) **Trans-Pt**, see **Figure 4** for the raw data.

**Table S4.** Rate constants and quantum yields for *cis*- and *trans*-Pt using the kinetic model shown in **Figure S23**.<sup>a</sup>

| Initial State                     | Resulting State                  | Rate Constant / Quantum Yield <sup>b</sup>                 |                                                            |
|-----------------------------------|----------------------------------|------------------------------------------------------------|------------------------------------------------------------|
|                                   |                                  | <i>Cis</i> -Pt                                             | <i>Trans</i> -Pt                                           |
| (S <sub>1</sub> S <sub>0</sub> )* | (S <sub>1</sub> S <sub>0</sub> ) | 3.10 x 10 <sup>11</sup> s <sup>-1</sup> / 100%             | 5.26 x 10 <sup>11</sup> s <sup>-1</sup> / 100%             |
|                                   | (S <sub>0</sub> S <sub>0</sub> ) | 0 s <sup>-1</sup> / 0%                                     | 0 s <sup>-1</sup> / 0%                                     |
| (S <sub>1</sub> S <sub>0</sub> )  | (T <sub>1</sub> T <sub>1</sub> ) | 1.94 x 10 <sup>10</sup> s <sup>-1</sup> / 95% <sup>c</sup> | 4.55 x 10 <sup>10</sup> s <sup>-1</sup> / 95% <sup>c</sup> |
|                                   | (S <sub>0</sub> S <sub>0</sub> ) | 1.02 x 10 <sup>9</sup> s <sup>-1</sup> / 5%                | 2.40 x 10 <sup>9</sup> s <sup>-1</sup> / 5%                |
| (T <sub>1</sub> T <sub>1</sub> )  | (T <sub>1</sub> S <sub>0</sub> ) | 1.60 x 10 <sup>9</sup> s <sup>-1</sup> / 100 %             | 5.01 x 10 <sup>9</sup> s <sup>-1</sup> / 100 %             |
|                                   | (S <sub>0</sub> S <sub>0</sub> ) | 0 s <sup>-1</sup> / 0%                                     | 0 s <sup>-1</sup> / 0%                                     |
| (T <sub>1</sub> S <sub>0</sub> )  | (S <sub>0</sub> S <sub>0</sub> ) | 1.64 x 10 <sup>6</sup> s <sup>-1</sup> / 100%              | 3.03 x 10 <sup>6</sup> s <sup>-1</sup> / 100%              |

<sup>a</sup> See **Figure 24** for the corresponding target analyses.

<sup>b</sup> The quantum yield is always given with respect to the initial state on the left side of the corresponding row. It is calculated from the target analysis as the ratio of the corresponding rate and the sum over all rates that lead to a deactivation of the corresponding initial state.

<sup>c</sup> Please note: a quantum yield of 95% for the transition from (S<sub>1</sub>S<sub>0</sub>) to (T<sub>1</sub>T<sub>1</sub>) corresponds to a triplet yield of 2x95% = 190%, as (T<sub>1</sub>T<sub>1</sub>) consists of two correlated triplets.

## Supplemental polarity-dependent characterization

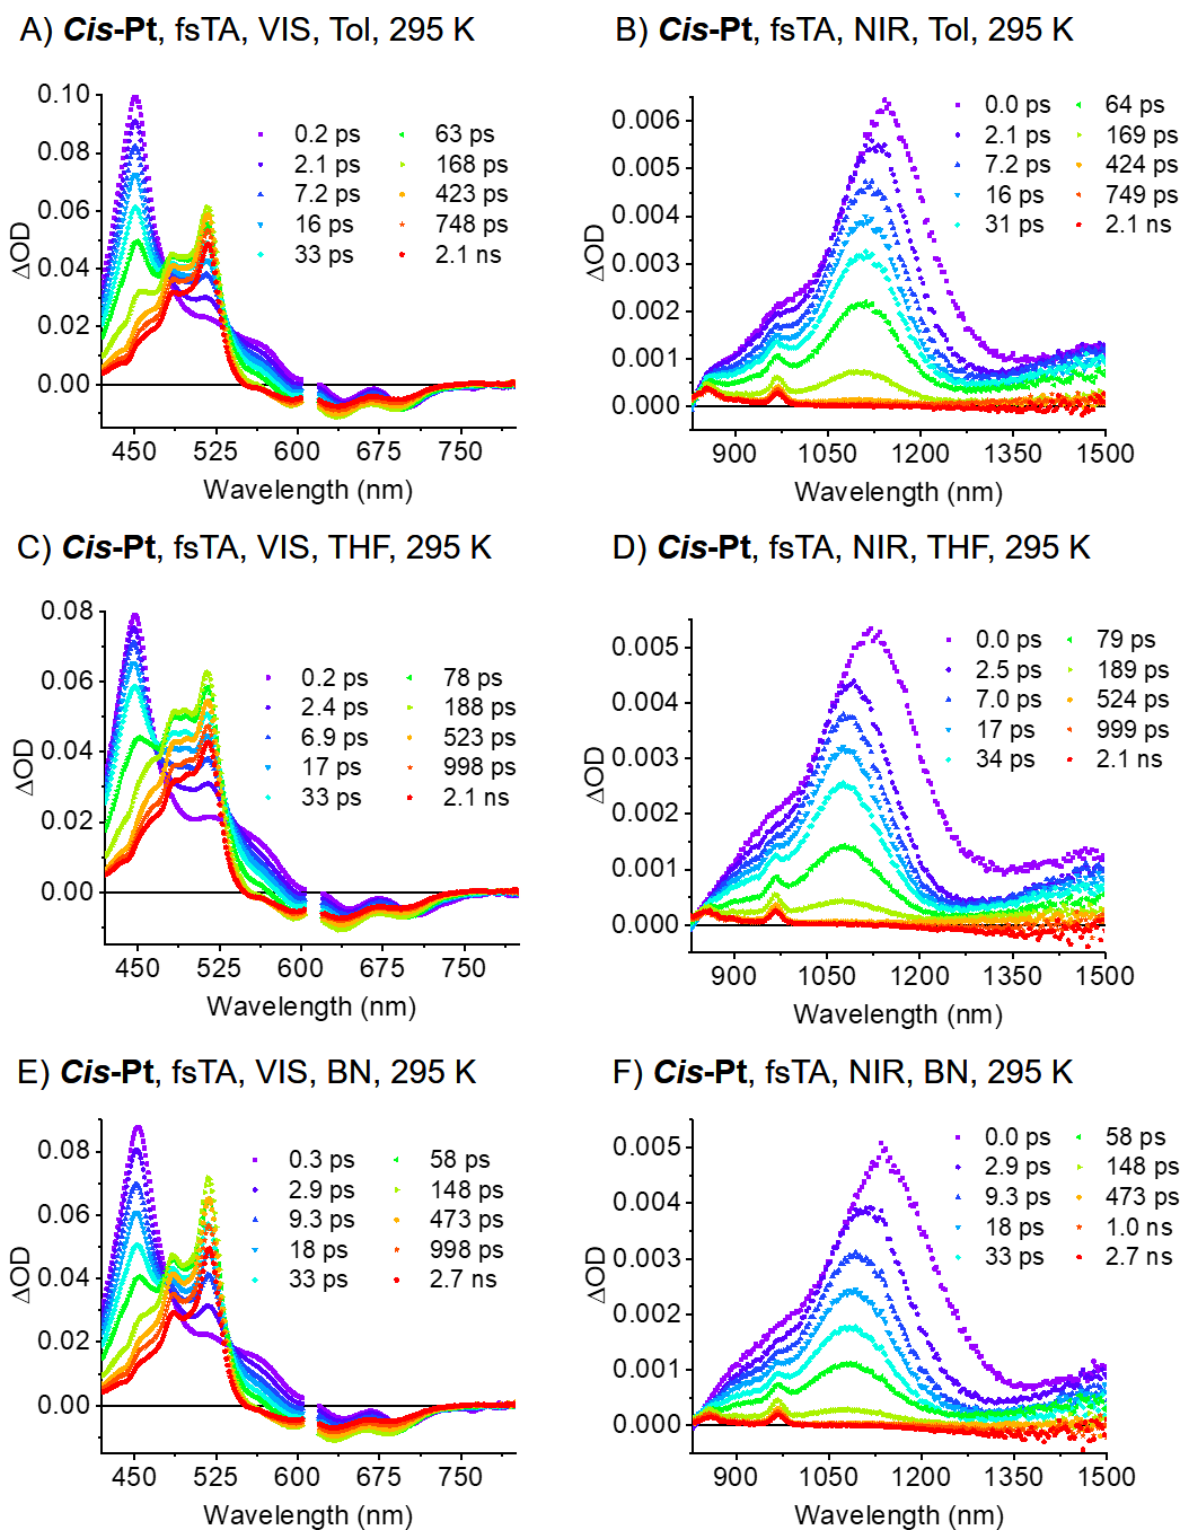

**Figure S25: Femtosecond transient absorption spectra of *cis*-Pt in various solvents**

Measured at room temperature with an excitation wavelength of 610 nm.

A & B *Cis-Pt* (VIS & NIR) measured in argon saturated toluene.

C & D *Cis-Pt* (VIS & NIR) measured in argon saturated THF.

E & F *Cis-Pt* (VIS & NIR) measured in argon saturated benzonitrile.



A) *Trans-Pt*, fsTA, VIS, Tol, 295 K

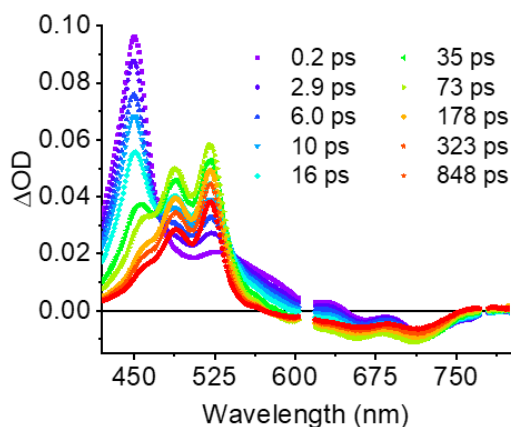

B) *Trans-Pt*, fsTA, NIR, Tol, 295 K

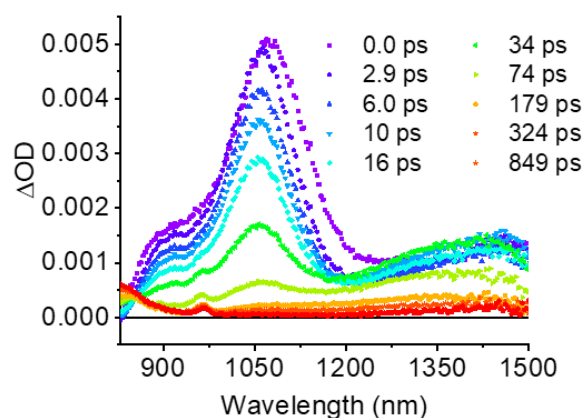

C) *Trans-Pt*, fsTA, VIS, THF, 295 K

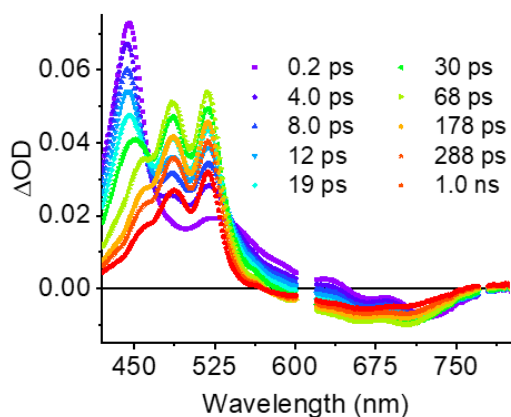

D) *Trans-Pt*, fsTA, NIR, THF, 295 K

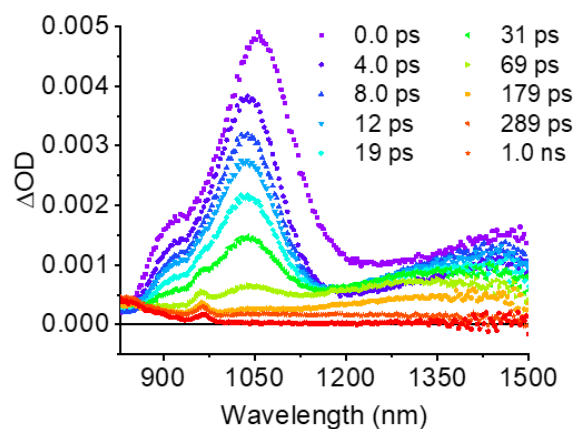

E) *Trans-Pt*, fsTA, VIS, BN, 295 K

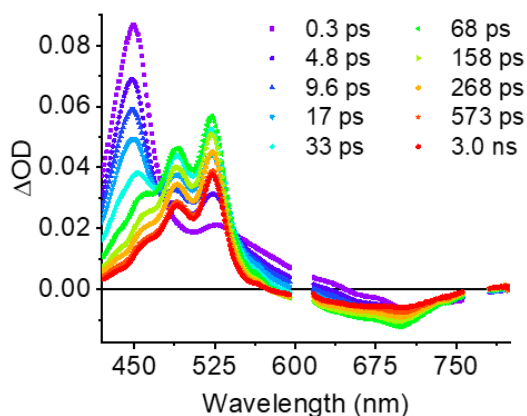

F) *Trans-Pt*, fsTA, NIR, BN, 295 K

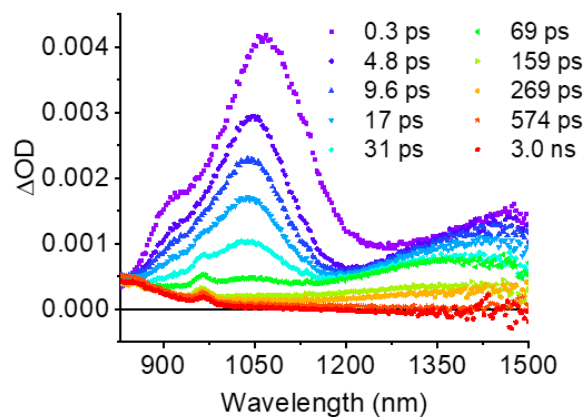

**Figure S26: Femtosecond transient absorption spectra of *trans-Pt* in various solvents**

Measured at room temperature with an excitation wavelength of 610 nm.

A & B) *Trans-Pt* (VIS & NIR) measured in argon saturated toluene.

C & D) *Trans-Pt* (VIS & NIR) measured in argon saturated THF.

E & F) *Trans-Pt* (VIS & NIR) measured in argon saturated benzonitrile.

A) *Cis-Pt*, fsTA, VIS, Tol, 295 K

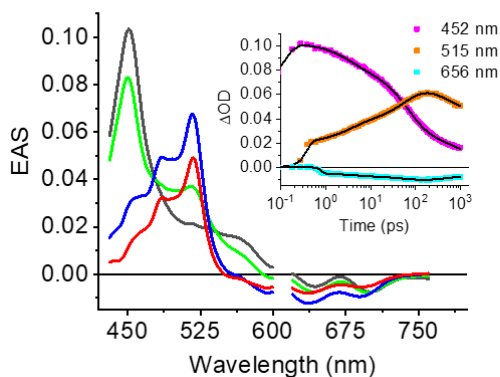

B) *Cis-Pt*, fsTA, NIR, Tol, 295 K

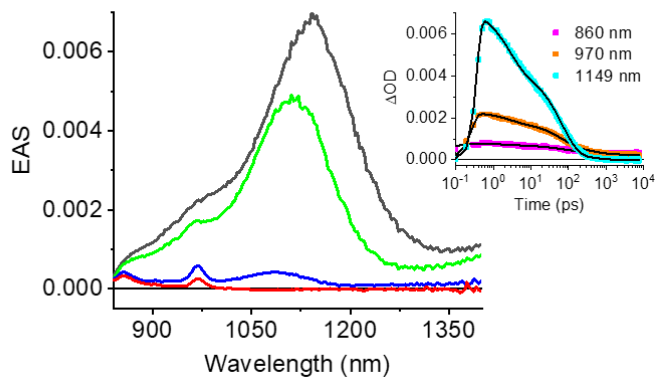

C) *Cis-Pt*, fsTA, VIS, THF, 295 K

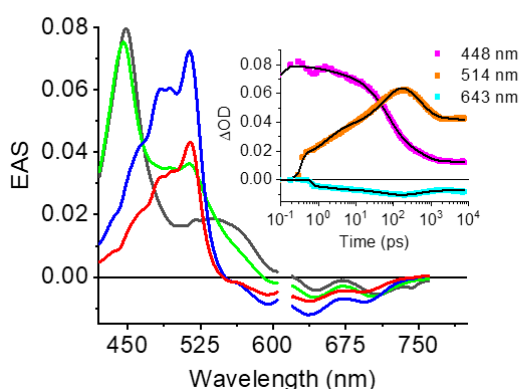

D) *Cis-Pt*, fsTA, NIR, THF, 295 K

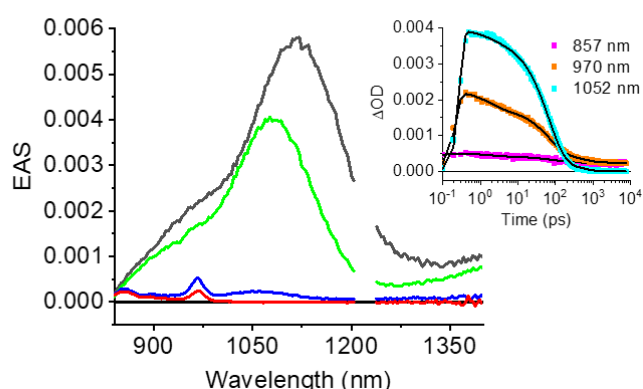

E) *Cis-Pt*, fsTA, VIS, BN, 295 K

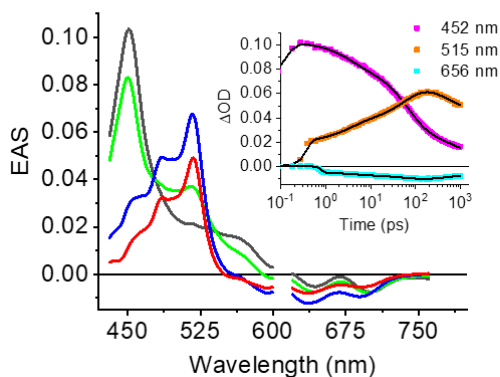

F) *Cis-Pt*, fsTA, NIR, BN, 295 K

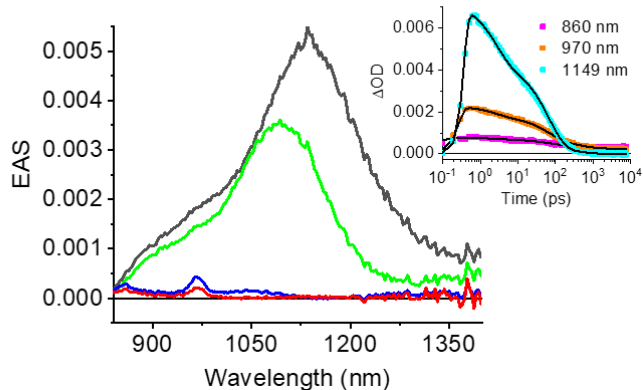

**Figure S27: Transient absorption data of *cis-Pt* in various solvents**

All figures show the EAS of the  $(S_0S_1)^*$  state before solvent relaxation (grey), the  $(S_0S_1)$  state after solvent relaxation (green), the correlated triplet pair state  $(T_1T_1)$  (blue) and the decorrelation triplet state  $(T_1 + T_1)$  or  $(S_0T_1)$  (red) of *cis-Pt*. The EAS were obtained upon global analysis with a sequential model of fsTA data measured at room temperature. See **Figure S23** for the raw data.

A & B) EAS of *cis-Pt* (VIS & NIR) measured in argon saturated toluene.

C & D) EAS of *cis-Pt* (VIS & NIR) measured in argon saturated THF.

E & F) EAS of *cis-Pt* (VIS & NIR) measured in argon saturated benzonitrile.

Insets: Raw data single wavelength kinetics and fits to the data.

A) *Trans*-Pt, fsTA, VIS, Tol, 295 K

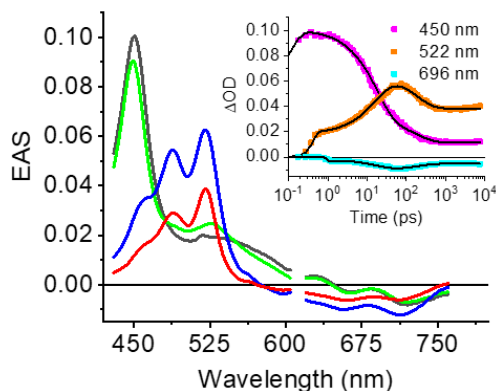

B) *Trans*-Pt, fsTA, NIR, Tol, 295 K

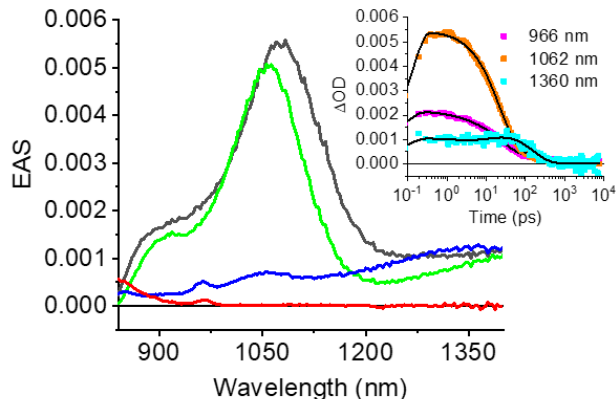

C) *Trans*-Pt, fsTA, VIS, THF, 295 K

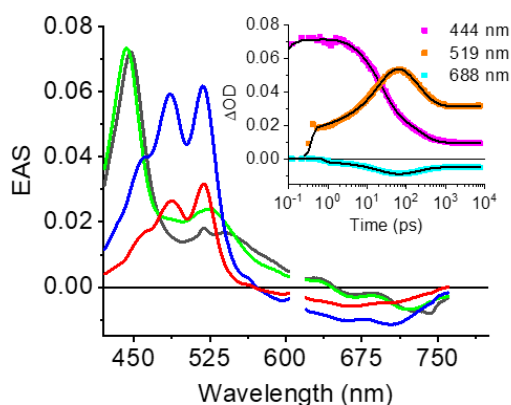

D) *Trans*-Pt, fsTA, NIR, THF, 295 K

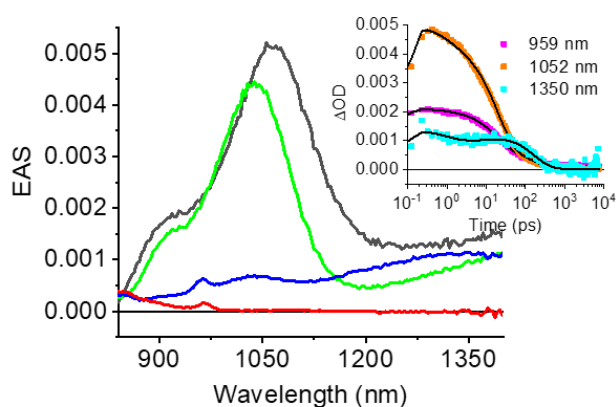

E) *Trans*-Pt, fsTA, VIS, BN, 295 K

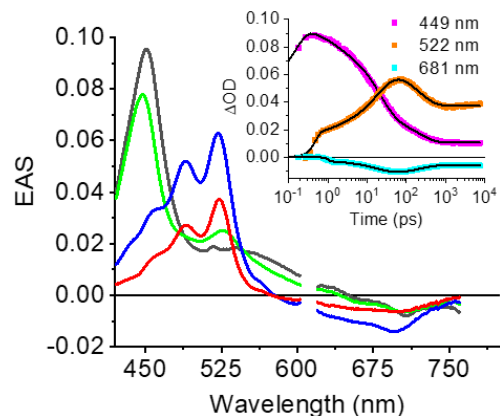

F) *Trans*-Pt, fsTA, NIR, BN, 295 K

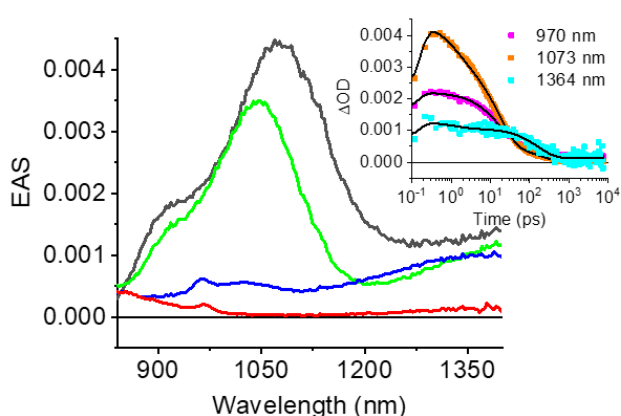

**Figure S28: Transient absorption data of *trans*-Pt in various solvents**

All figures show the EAS of the  $(S_0S_1)^*$  state before solvent relaxation (grey), the  $(S_0S_1)$  state after solvent relaxation (green), the correlated triplet pair state  $(T_1T_1)$  (blue) and the decorrelation triplet state  $(T_1 + T_1)$  or  $(S_0T_1)$  (red) of *trans*-Pt. The EAS were obtained upon global analysis with a sequential model of fsTA data measured at room temperature. See **Figure S24** for the raw data.

A & B) EAS of *trans*-Pt (VIS & NIR) measured in argon saturated toluene.

C & D) EAS of *trans*-Pt (VIS & NIR) measured in argon saturated THF.

E & F) EAS of *trans*-Pt (VIS & NIR) measured in argon saturated benzonitrile.

Insets: Raw data single wavelength kinetics and fits to the data.

## Supplemental transient and steady-state IR data

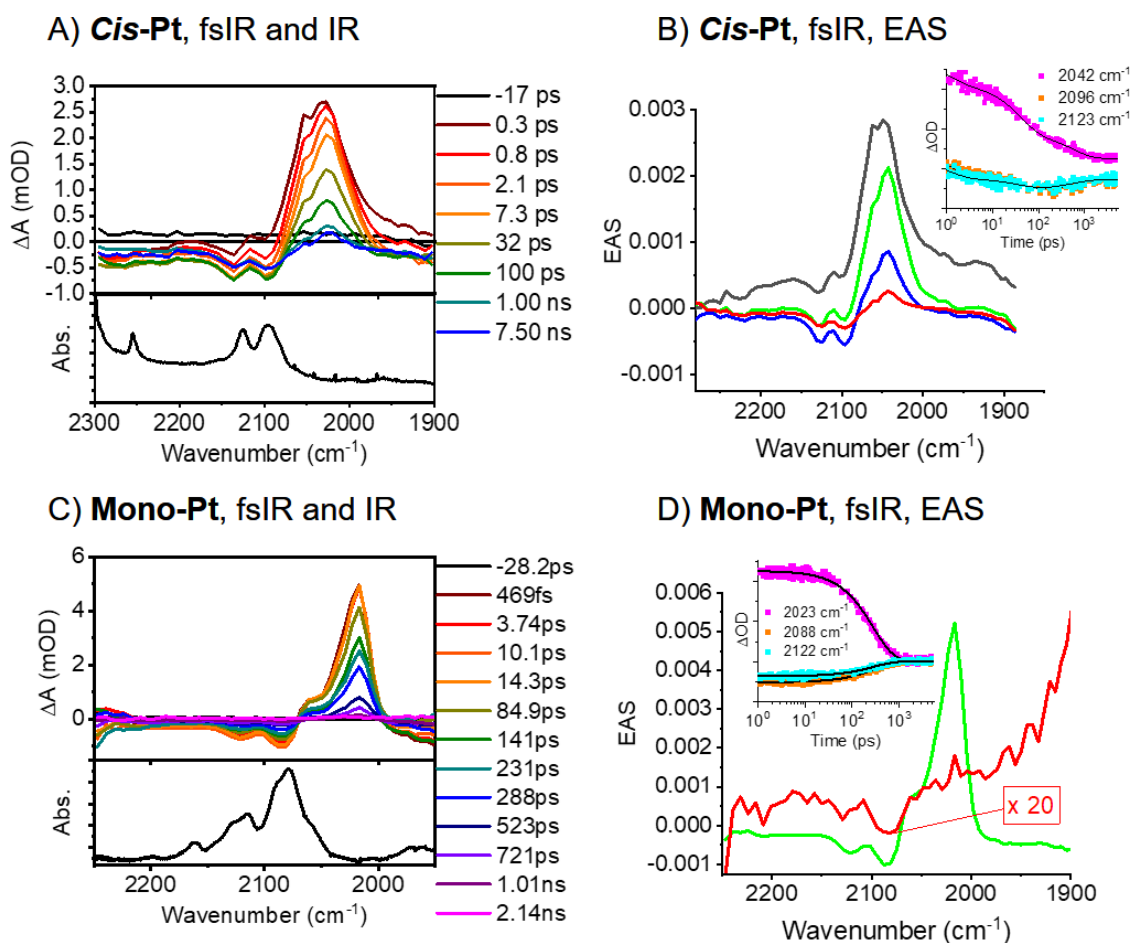

**Figure S29: Transient and steady-state IR absorption spectra of *cis*- and mono-Pt**

Measured at room temperature in oxygen-free dichloromethane. The transient IR spectra were excited at 650 nm.

A) Transient and steady-state IR absorption spectra of ***cis*-Pt**.

B) EAS of the  $(S_0S_1)^*$  state before solvent relaxation (gray),  $(S_0S_1)$  state after solvent relaxation (green), the correlated triplet pair state  $(T_1T_1)$  (blue) and the decorrelation triplet state  $(T_1S_0)$  (red) of ***cis*-Pt** obtained upon global analysis with a sequential model of fsIR data. See A) for the raw data. Inset: Raw data single-wavenumber kinetics and fits to the data.

C) Transient and steady-state IR absorption spectra of **mono-Pt**.

D) EAS of the  $(S_1)$  state after solvent relaxation (green) and the triplet state  $(T_1)$  (red) of **mono-Pt** obtained upon global analysis with a sequential model of fsIR data. See C) for the raw data. Inset: Raw data single-wavenumber kinetics and fits to the data.

## Comparison of *trans*- and *cis*-Pt with other covalent pentacene dimers

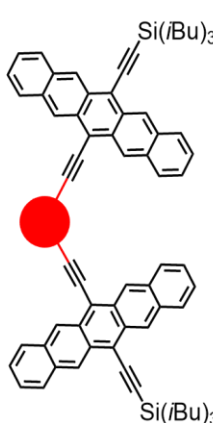

| Linker                                                                            | Molecule         | $\tau(S_0S_1)$                   | $\tau(T_1T_1)$                   | $\tau(T_1)$          |
|-----------------------------------------------------------------------------------|------------------|----------------------------------|----------------------------------|----------------------|
|  | <i>trans</i> -Pt | $21 \pm 1$ ps                    | $200 \pm 10$ ps                  | $330 \pm 20$ ns      |
|  | <i>cis</i> -Pt   | $49 \pm 2$ ps                    | $620 \pm 30$ ps                  | $610 \pm 30$ ns      |
|  | <i>m</i> -3      | $16 \pm 1$ ps /<br>$63 \pm 3$ ps | $2.2 \pm 0.1$ ns                 | -                    |
|  | <i>o</i> -3      | $0.5 \pm 0.2$ ps                 | $12 \pm 1$ ps                    | -                    |
|  | <i>p</i> -3      | $2.7 \pm 0.9$ ps                 | $17 \pm 1$ ps                    | -                    |
|  | <b>Nc-m</b>      | $400 \pm 10$ ps                  | $14 \pm 1$ ns /<br>$95 \pm 1$ ns | $32 \pm 0.5$ $\mu$ s |
|  | <b>Nc-p</b>      | $4.0 \pm 0.2$ ns                 | $130 \pm 5$ ns                   | $34 \pm 2$ $\mu$ s   |

**Figure S30: Comparison of *trans*- and *cis*-Pt with other covalent pentacene dimers.**<sup>19, 21, 22</sup> The lifetimes of *trans*- and *cis*-Pt were measured in butyronitrile, while those of *m*-3, *o*-3, *p*-3, **Nc-m** and **Nc-p** were measured in benzonitrile.  $\tau(S_0S_1)$  is the measured singlet deactivation time, not the corrected singlet fission lifetime.

# Supplemental theory results

## HF/LANL2DZ-optimized geometries

### *Trans-Pt*

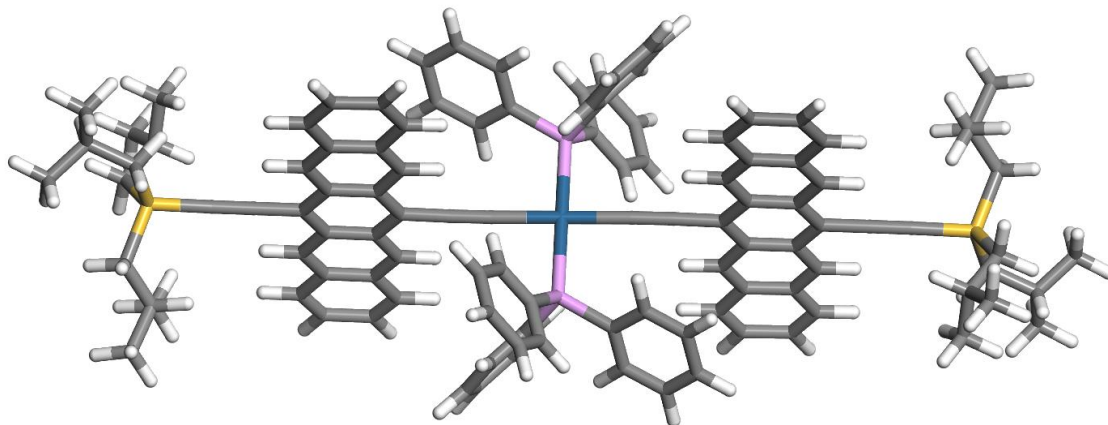

### Optimized geometry (coordinates in Å) of *trans-Pt*.

| Atomic Number | x         | y        | z        |
|---------------|-----------|----------|----------|
| 15            | -0.0037   | 0.98601  | -2.25435 |
| 14            | -12.04633 | 0.05461  | 0.21757  |
| 6             | -6.85934  | -1.25354 | -0.23128 |
| 6             | -2.04048  | -0.08909 | 0.02538  |
| 6             | -7.54627  | -0.06324 | 0.09037  |
| 6             | -3.25695  | -0.10365 | 0.03954  |
| 6             | -6.82687  | 1.11757  | 0.37499  |
| 6             | -8.98274  | -0.04903 | 0.12291  |
| 6             | -7.48351  | 2.33722  | 0.69584  |
| 1             | -8.55343  | 2.34764  | 0.73203  |
| 6             | -10.19293 | -0.02919 | 0.1518   |
| 6             | -6.78854  | 3.49557  | 0.95656  |
| 6             | -12.65451 | -0.99138 | 1.70222  |
| 1             | -12.72128 | -0.31605 | 2.55306  |
| 1             | -13.67511 | -1.31285 | 1.49739  |
| 6             | -7.45751  | 4.73991  | 1.28342  |
| 1             | -8.52964  | 4.74433  | 1.3289   |
| 6             | -11.81907 | -2.22532 | 2.12869  |
| 1             | -10.79815 | -1.90021 | 2.30079  |
| 6             | -4.69085  | 2.31645  | 0.59925  |
| 1             | -3.62208  | 2.30718  | 0.54161  |
| 6             | -11.79003 | -3.32155 | 1.04699  |
| 1             | -12.79606 | -3.65758 | 0.80951  |
| 1             | -11.22433 | -4.18215 | 1.38981  |
| 1             | -11.32762 | -2.97025 | 0.13141  |
| 6             | -5.38641  | 1.10552  | 0.33964  |
| 6             | -12.36219 | -2.80039 | 3.45195  |
| 1             | -11.76582 | -3.64478 | 3.78501  |
| 1             | -13.38733 | -3.14115 | 3.33355  |
| 1             | -12.34837 | -2.05212 | 4.238    |

|   |           |          |          |
|---|-----------|----------|----------|
| 6 | -12.46093 | 1.90125  | 0.50551  |
| 1 | -12.23527 | 2.12101  | 1.54914  |
| 1 | -11.74916 | 2.48005  | -0.0776  |
| 6 | -13.8878  | 2.41037  | 0.18258  |
| 1 | -14.10041 | 2.19636  | -0.86133 |
| 6 | -13.95779 | 3.93988  | 0.36447  |
| 1 | -13.75656 | 4.21349  | 1.39651  |
| 1 | -14.94064 | 4.32123  | 0.1034   |
| 1 | -13.22731 | 4.44169  | -0.26191 |
| 6 | -14.97131 | 1.72486  | 1.03678  |
| 1 | -15.0192  | 0.65772  | 0.85116  |
| 1 | -15.95096 | 2.13808  | 0.81887  |
| 1 | -14.77689 | 1.87019  | 2.09559  |
| 6 | -12.78342 | -0.62969 | -1.41165 |
| 1 | -12.9297  | -1.69642 | -1.2631  |
| 1 | -13.78271 | -0.21084 | -1.52819 |
| 6 | -11.99441 | -0.42378 | -2.72923 |
| 1 | -10.99289 | -0.81878 | -2.58909 |
| 6 | -12.65866 | -1.21388 | -3.87443 |
| 1 | -12.72017 | -2.2713  | -3.63693 |
| 1 | -12.09557 | -1.11154 | -4.79741 |
| 1 | -13.66766 | -0.85397 | -4.05717 |
| 6 | -11.86373 | 1.06156  | -3.11419 |
| 1 | -12.84294 | 1.51804  | -3.23226 |
| 1 | -11.33311 | 1.16763  | -4.05501 |
| 1 | -11.31516 | 1.6231   | -2.36732 |
| 6 | -4.69175  | -0.09154 | 0.04487  |
| 6 | -5.41808  | -1.26861 | -0.24844 |
| 6 | -4.75315  | -2.48107 | -0.5753  |
| 1 | -3.68243  | -2.48711 | -0.57474 |
| 6 | -5.44142  | -3.63054 | -0.88758 |
| 6 | -4.76622  | -4.86353 | -1.24    |
| 1 | -3.69368  | -4.86581 | -1.25695 |
| 6 | -5.4662   | -5.98128 | -1.5447  |
| 1 | -4.95904  | -6.88859 | -1.80902 |
| 6 | -6.91535  | -5.96877 | -1.5207  |
| 1 | -7.44586  | -6.86855 | -1.7644  |
| 6 | -7.59058  | -4.84083 | -1.19823 |
| 1 | -8.66352  | -4.83067 | -1.18169 |
| 6 | -6.88631  | -3.61657 | -0.86912 |
| 6 | -7.54982  | -2.4559  | -0.54494 |
| 1 | -8.62022  | -2.44931 | -0.53055 |
| 6 | 0.75622   | -0.07186 | -3.59248 |
| 6 | 0.42521   | 0.13577  | -4.93789 |
| 1 | -0.28283  | 0.89127  | -5.21166 |
| 6 | 1.00473   | -0.64445 | -5.93608 |
| 1 | 0.74163   | -0.47594 | -6.96174 |
| 6 | 1.92189   | -1.64217 | -5.60088 |
| 1 | 2.36837   | -2.24255 | -6.36912 |
| 6 | 2.25427   | -1.85486 | -4.26456 |
| 1 | 2.96217   | -2.61451 | -3.99839 |
| 6 | 1.6721    | -1.07422 | -3.26449 |
| 1 | 1.94137   | -1.23871 | -2.2441  |

|    |          |          |          |
|----|----------|----------|----------|
| 6  | -6.75136 | 5.86924  | 1.52505  |
| 1  | -7.25587 | 6.78453  | 1.76592  |
| 6  | -5.30333 | 5.86347  | 1.4607   |
| 1  | -4.77119 | 6.77459  | 1.65255  |
| 6  | -4.63537 | 4.72502  | 1.16045  |
| 1  | -3.56317 | 4.71706  | 1.10786  |
| 6  | -5.34492 | 3.48833  | 0.89947  |
| 6  | 0.9583   | 2.58116  | -2.23405 |
| 6  | 0.71835  | 3.48315  | -1.19054 |
| 1  | 0.01499  | 3.23797  | -0.41872 |
| 6  | 1.39241  | 4.69972  | -1.14067 |
| 1  | 1.19468  | 5.38624  | -0.34083 |
| 6  | 2.33285  | 5.01908  | -2.12285 |
| 1  | 2.86497  | 5.94864  | -2.07669 |
| 6  | 2.58864  | 4.11691  | -3.15229 |
| 1  | 3.32084  | 4.34734  | -3.90056 |
| 6  | 1.90065  | 2.90255  | -3.2102  |
| 1  | 2.11737  | 2.21801  | -4.00398 |
| 6  | -1.65766 | 1.44508  | -2.99015 |
| 6  | -2.57745 | 0.42297  | -3.25319 |
| 1  | -2.33444 | -0.59419 | -3.02117 |
| 6  | -3.81957 | 0.71507  | -3.80537 |
| 1  | -4.51669 | -0.07697 | -3.99383 |
| 6  | -4.16359 | 2.03792  | -4.09433 |
| 1  | -5.12588 | 2.26488  | -4.50922 |
| 6  | -3.25503 | 3.05945  | -3.83303 |
| 1  | -3.5109  | 4.07796  | -4.0495  |
| 6  | -2.00401 | 2.76398  | -3.2843  |
| 1  | -1.31783 | 3.5641   | -3.09943 |
| 15 | 0.00371  | -0.98625 | 2.25401  |
| 14 | 12.04635 | -0.05433 | -0.21711 |
| 6  | 6.85926  | 1.25364  | 0.23131  |
| 6  | 2.04047  | 0.08897  | -0.02566 |
| 6  | 7.54627  | 0.06336  | -0.09027 |
| 6  | 3.25695  | 0.10357  | -0.03974 |
| 6  | 6.82695  | -1.11749 | -0.37491 |
| 6  | 8.98274  | 0.04921  | -0.12271 |
| 6  | 7.48367  | -2.33711 | -0.69568 |
| 1  | 8.55359  | -2.34749 | -0.73178 |
| 6  | 10.19294 | 0.02941  | -0.1515  |
| 6  | 6.78877  | -3.49551 | -0.95642 |
| 6  | 12.65462 | 0.99165  | -1.70172 |
| 1  | 12.72148 | 0.3163   | -2.55255 |
| 1  | 13.6752  | 1.31315  | -1.49682 |
| 6  | 7.45782  | -4.73982 | -1.28319 |
| 1  | 8.52995  | -4.7442  | -1.32859 |
| 6  | 11.81918 | 2.22556  | -2.12829 |
| 1  | 10.79829 | 1.90041  | -2.30047 |
| 6  | 4.691    | -2.31648 | -0.59929 |
| 1  | 3.62222  | -2.30726 | -0.54174 |
| 6  | 11.79003 | 3.3218   | -1.04661 |
| 1  | 12.79602 | 3.65787  | -0.80905 |
| 1  | 11.22433 | 4.18239  | -1.3895  |



|   |          |          |          |
|---|----------|----------|----------|
| 1 | 11.32755 | 2.97051  | -0.13107 |
| 6 | 5.38648  | -1.10551 | -0.33967 |
| 6 | 12.3624  | 2.80062  | -3.45152 |
| 1 | 11.76604 | 3.64499  | -3.78465 |
| 1 | 13.38752 | 3.1414   | -3.33303 |
| 1 | 12.34867 | 2.05233  | -4.23756 |
| 6 | 12.46102 | -1.90097 | -0.50498 |
| 1 | 12.23546 | -2.12075 | -1.54862 |
| 1 | 11.74922 | -2.47977 | 0.07808  |
| 6 | 13.88788 | -2.41003 | -0.18191 |
| 1 | 14.1004  | -2.196   | 0.86201  |
| 6 | 13.95793 | -3.93955 | -0.36377 |
| 1 | 13.7568  | -4.21318 | -1.39582 |
| 1 | 14.94077 | -4.32087 | -0.10261 |
| 1 | 13.22742 | -4.44137 | 0.26255  |
| 6 | 14.97144 | -1.72451 | -1.03604 |
| 1 | 15.01929 | -0.65736 | -0.85045 |
| 1 | 15.95109 | -2.1377  | -0.81804 |
| 1 | 14.77711 | -1.86987 | -2.09486 |
| 6 | 12.78328 | 0.63002  | 1.41216  |
| 1 | 12.92953 | 1.69676  | 1.26361  |
| 1 | 13.78257 | 0.21121  | 1.52879  |
| 6 | 11.99416 | 0.42411  | 2.72967  |
| 1 | 10.99264 | 0.81908  | 2.58945  |
| 6 | 12.65829 | 1.21426  | 3.87492  |
| 1 | 12.7198  | 2.27167  | 3.6374   |
| 1 | 12.09513 | 1.11191  | 4.79786  |
| 1 | 13.66728 | 0.85438  | 4.05775  |
| 6 | 11.86349 | -1.06122 | 3.11466  |
| 1 | 12.8427  | -1.51767 | 3.23281  |
| 1 | 11.3328  | -1.16729 | 4.05543  |
| 1 | 11.315   | -1.62279 | 2.36775  |
| 6 | 4.69175  | 0.09153  | -0.04499 |
| 6 | 5.418    | 1.26864  | 0.24836  |
| 6 | 4.75299  | 2.48107  | 0.57517  |
| 1 | 3.68227  | 2.48706  | 0.57454  |
| 6 | 5.44119  | 3.63057  | 0.88749  |
| 6 | 4.76591  | 4.86353  | 1.23986  |
| 1 | 3.69337  | 4.86577  | 1.25673  |
| 6 | 5.46582  | 5.98132  | 1.5446   |
| 1 | 4.95859  | 6.8886   | 1.80889  |
| 6 | 6.91497  | 5.96887  | 1.5207   |
| 1 | 7.44542  | 6.86868  | 1.76443  |
| 6 | 7.59027  | 4.84096  | 1.19827  |
| 1 | 8.66321  | 4.83086  | 1.1818   |
| 6 | 6.88608  | 3.61668  | 0.86913  |
| 6 | 7.54967  | 2.45603  | 0.545    |
| 1 | 8.62006  | 2.4495   | 0.53068  |
| 6 | -0.75619 | 0.07162  | 3.59215  |
| 6 | -0.42514 | -0.13598 | 4.93756  |
| 1 | 0.28292  | -0.89147 | 5.21132  |
| 6 | -1.00466 | 0.64424  | 5.93575  |
| 1 | -0.74153 | 0.47575  | 6.96141  |

|    |          |          |          |
|----|----------|----------|----------|
| 6  | -1.92185 | 1.64193  | 5.60056  |
| 1  | -2.36833 | 2.2423   | 6.36881  |
| 6  | -2.25427 | 1.85459  | 4.26425  |
| 1  | -2.9622  | 2.61422  | 3.99809  |
| 6  | -1.6721  | 1.07395  | 3.26417  |
| 1  | -1.94141 | 1.23842  | 2.24379  |
| 6  | 6.75175  | -5.8692  | -1.52484 |
| 1  | 7.25631  | -6.78447 | -1.76564 |
| 6  | 5.30371  | -5.8635  | -1.46061 |
| 1  | 4.77163  | -6.77464 | -1.65247 |
| 6  | 4.63568  | -4.72506 | -1.16044 |
| 1  | 3.56347  | -4.71715 | -1.10793 |
| 6  | 5.34515  | -3.48834 | -0.89943 |
| 6  | -0.95831 | -2.58138 | 2.23369  |
| 6  | -0.71844 | -3.48332 | 1.19013  |
| 1  | -0.01513 | -3.23811 | 0.41827  |
| 6  | -1.39252 | -4.69988 | 1.14024  |
| 1  | -1.19484 | -5.38636 | 0.34036  |
| 6  | -2.3329  | -5.01928 | 2.12248  |
| 1  | -2.86503 | -5.94883 | 2.0763   |
| 6  | -2.5886  | -4.11716 | 3.15197  |
| 1  | -3.32075 | -4.34761 | 3.90029  |
| 6  | -1.90059 | -2.9028  | 3.20989  |
| 1  | -2.11725 | -2.2183  | 4.00373  |
| 6  | 1.65767  | -1.44536 | 2.98978  |
| 6  | 2.57748  | -0.42327 | 3.25289  |
| 1  | 2.33448  | 0.5939   | 3.02093  |
| 6  | 3.81959  | -0.71542 | 3.80504  |
| 1  | 4.51673  | 0.0766   | 3.99354  |
| 6  | 4.16361  | -2.0383  | 4.09391  |
| 1  | 5.1259   | -2.26529 | 4.50877  |
| 6  | 3.25503  | -3.0598  | 3.83255  |
| 1  | 3.5109   | -4.07832 | 4.04895  |
| 6  | 2.00402  | -2.76429 | 3.28385  |
| 1  | 1.31783  | -3.56438 | 3.09893  |
| 78 | -2E-6    | -9.1E-5  | -1.54E-4 |

## Cis-Pt

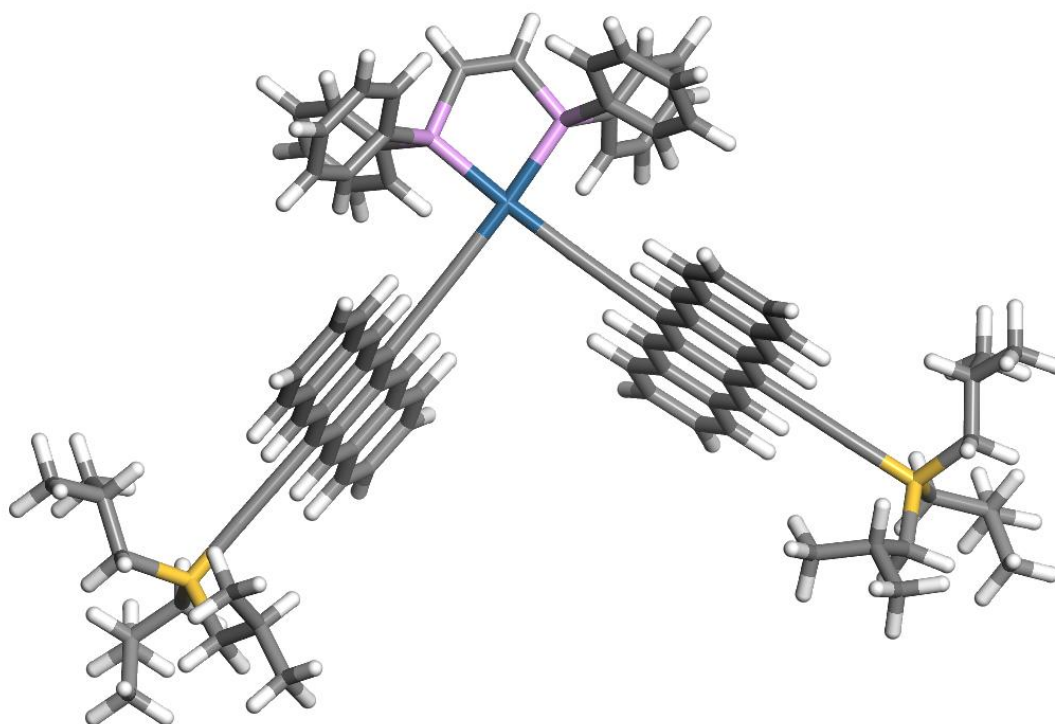

Optimized geometry (coordinates in Å) of *cis*-Pt.

| Atomic Number | x       | y        | z        |
|---------------|---------|----------|----------|
| 15            | 1.65227 | 5.12692  | -0.54778 |
| 14            | 8.90679 | -4.69204 | 0.35998  |
| 6             | 5.13411 | -1.00046 | 1.27374  |
| 6             | 1.42236 | 1.91786  | -0.21711 |
| 6             | 5.49021 | -1.76818 | 0.14379  |
| 6             | 2.3014  | 1.08401  | -0.13199 |
| 6             | 4.78059 | -1.62232 | -1.06799 |
| 6             | 6.57777 | -2.70309 | 0.22686  |
| 6             | 5.10519 | -2.38234 | -2.22482 |
| 1             | 5.91266 | -3.08294 | -2.16678 |
| 6             | 7.49136 | -3.49411 | 0.29798  |
| 6             | 4.41314 | -2.24681 | -3.40612 |
| 6             | 8.43755 | -6.23557 | 1.38381  |
| 1             | 7.85476 | -6.91288 | 0.76268  |
| 1             | 9.374   | -6.75237 | 1.58281  |
| 6             | 4.74321 | -3.02214 | -4.58623 |
| 1             | 5.55816 | -3.7177  | -4.52618 |
| 6             | 7.68908 | -6.00941 | 2.72818  |
| 1             | 7.98399 | -5.04966 | 3.1473   |
| 6             | 2.98893 | -0.56123 | -2.38076 |
| 1             | 2.1706  | 0.12765  | -2.4285  |
| 6             | 8.07069 | -7.09547 | 3.75406  |
| 1             | 7.81839 | -8.08271 | 3.37713  |
| 1             | 7.54134 | -6.95036 | 4.6912   |

|   |          |          |          |
|---|----------|----------|----------|
| 1 | 9.13573  | -7.08081 | 3.9652   |
| 6 | 3.69489  | -0.67878 | -1.15371 |
| 6 | 6.16166  | -5.98675 | 2.52612  |
| 1 | 5.65152  | -5.76913 | 3.45945  |
| 1 | 5.8143   | -6.95497 | 2.17535  |
| 1 | 5.86449  | -5.24028 | 1.80187  |
| 6 | 9.25573  | -5.16714 | -1.46133 |
| 1 | 8.49087  | -5.88661 | -1.75432 |
| 1 | 9.06599  | -4.27813 | -2.05734 |
| 6 | 10.64623 | -5.72963 | -1.84867 |
| 1 | 11.40384 | -5.01126 | -1.54801 |
| 6 | 10.74168 | -5.89023 | -3.3794  |
| 1 | 10.00563 | -6.60488 | -3.7371  |
| 1 | 11.72418 | -6.24593 | -3.67576 |
| 1 | 10.56178 | -4.94613 | -3.8834  |
| 6 | 10.962   | -7.06888 | -1.15585 |
| 1 | 11.02413 | -6.96341 | -0.07891 |
| 1 | 11.91259 | -7.46423 | -1.49964 |
| 1 | 10.19561 | -7.80691 | -1.37494 |
| 6 | 10.37904 | -3.84989 | 1.24785  |
| 1 | 10.23092 | -4.03322 | 2.31107  |
| 1 | 11.28891 | -4.38769 | 0.9819   |
| 6 | 10.61017 | -2.33189 | 1.04415  |
| 1 | 9.68776  | -1.81423 | 1.28784  |
| 6 | 11.70458 | -1.82651 | 2.00543  |
| 1 | 11.4418  | -2.02807 | 3.03924  |
| 1 | 11.85166 | -0.75545 | 1.9014   |
| 1 | 12.65349 | -2.31538 | 1.80135  |
| 6 | 10.97615 | -1.97959 | -0.40954 |
| 1 | 11.88295 | -2.49447 | -0.71562 |
| 1 | 11.14962 | -0.91315 | -0.51274 |
| 1 | 10.18439 | -2.24803 | -1.099   |
| 6 | 3.34797  | 0.10749  | -0.03143 |
| 6 | 4.05013  | -0.05512 | 1.18505  |
| 6 | 3.7072   | 0.70013  | 2.33861  |
| 1 | 2.88958  | 1.388    | 2.26966  |
| 6 | 4.38164  | 0.56197  | 3.52938  |
| 6 | 4.03015  | 1.32879  | 4.70802  |
| 1 | 3.21307  | 2.021    | 4.63777  |
| 6 | 4.70979  | 1.17497  | 5.86861  |
| 1 | 4.44139  | 1.7429   | 6.73787  |
| 6 | 5.80809  | 0.23316  | 5.9565   |
| 1 | 6.32824  | 0.1289   | 6.88877  |
| 6 | 6.17068  | -0.50747 | 4.88292  |
| 1 | 6.98128  | -1.20758 | 4.94924  |
| 6 | 5.47433  | -0.37962 | 3.61737  |
| 6 | 5.81894  | -1.12531 | 2.51351  |
| 1 | 6.62483  | -1.82674 | 2.58426  |
| 6 | 4.04193  | -2.87741 | -5.7349  |
| 1 | 4.29303  | -3.45736 | -6.6015  |
| 6 | 2.93716  | -1.94253 | -5.81369 |
| 1 | 2.39467  | -1.85605 | -6.73475 |
| 6 | 2.59283  | -1.19702 | -4.73779 |

|    |          |          |          |
|----|----------|----------|----------|
| 1  | 1.77039  | -0.50903 | -4.78831 |
| 6  | 3.31585  | -1.31002 | -3.48686 |
| 6  | 2.80504  | 5.10965  | -2.00347 |
| 6  | 2.6814   | 4.10607  | -2.9654  |
| 1  | 1.95173  | 3.33228  | -2.84385 |
| 6  | 3.52724  | 4.09403  | -4.0763  |
| 1  | 3.43567  | 3.31373  | -4.80517 |
| 6  | 4.49519  | 5.0842   | -4.228   |
| 1  | 5.14693  | 5.07162  | -5.07921 |
| 6  | 4.62513  | 6.0874   | -3.26384 |
| 1  | 5.37597  | 6.84476  | -3.37291 |
| 6  | 3.78524  | 6.09772  | -2.15403 |
| 1  | 3.90914  | 6.85967  | -1.40878 |
| 6  | 2.73135  | 5.46375  | 0.9277   |
| 6  | 2.43953  | 6.4857   | 1.83349  |
| 1  | 1.59459  | 7.12764  | 1.68159  |
| 6  | 3.24416  | 6.67932  | 2.95733  |
| 1  | 3.01319  | 7.46662  | 3.64765  |
| 6  | 4.33982  | 5.84822  | 3.18354  |
| 1  | 4.95564  | 5.99266  | 4.04909  |
| 6  | 4.62958  | 4.82072  | 2.28363  |
| 1  | 5.46173  | 4.16904  | 2.4593   |
| 6  | 3.82948  | 4.62819  | 1.16019  |
| 1  | 4.05645  | 3.8289   | 0.48369  |
| 15 | -1.6472  | 5.1312   | -0.53751 |
| 14 | -8.89578 | -4.70308 | 0.37891  |
| 6  | -5.13288 | -0.98886 | 1.30289  |
| 6  | -1.42402 | 1.92186  | -0.20949 |
| 6  | -5.50113 | -1.75207 | 0.17395  |
| 6  | -2.30515 | 1.09072  | -0.11993 |
| 6  | -4.80139 | -1.60442 | -1.04345 |
| 6  | -6.59047 | -2.68486 | 0.26205  |
| 6  | -5.13784 | -2.35982 | -2.19996 |
| 1  | -5.94663 | -3.05842 | -2.13732 |
| 6  | -7.50726 | -3.47277 | 0.32871  |
| 6  | -4.45553 | -2.22248 | -3.3867  |
| 6  | -8.37683 | -6.16946 | 1.49607  |
| 1  | -7.91615 | -6.90985 | 0.84491  |
| 1  | -9.28006 | -6.63761 | 1.88603  |
| 6  | -4.79789 | -2.99315 | -4.56637 |
| 1  | -5.6141  | -3.6868  | -4.50142 |
| 6  | -7.40895 | -5.89373 | 2.67498  |
| 1  | -6.52658 | -5.40041 | 2.28077  |
| 6  | -3.01781 | -0.54433 | -2.36821 |
| 1  | -2.19796 | 0.14238  | -2.42073 |
| 6  | -8.02744 | -4.97318 | 3.74396  |
| 1  | -8.93927 | -5.40638 | 4.14707  |
| 1  | -7.33639 | -4.82639 | 4.56797  |
| 1  | -8.26846 | -3.99563 | 3.34152  |
| 6  | -3.71348 | -0.6639  | -1.13548 |
| 6  | -6.96171 | -7.22319 | 3.31455  |
| 1  | -6.25401 | -7.05053 | 4.11998  |
| 1  | -7.81254 | -7.7599  | 3.72596  |

|   |           |          |          |
|---|-----------|----------|----------|
| 1 | -6.48315  | -7.86682 | 2.5834   |
| 6 | -9.11066  | -5.30076 | -1.42716 |
| 1 | -8.28205  | -5.97593 | -1.64125 |
| 1 | -8.95776  | -4.43546 | -2.06708 |
| 6 | -10.43673 | -5.98702 | -1.83928 |
| 1 | -11.25582 | -5.30382 | -1.63146 |
| 6 | -10.43992 | -6.26475 | -3.35598 |
| 1 | -9.63967  | -6.94954 | -3.62259 |
| 1 | -11.37927 | -6.7097  | -3.67124 |
| 1 | -10.29719 | -5.34929 | -3.92108 |
| 6 | -10.69848 | -7.29077 | -1.06125 |
| 1 | -10.80789 | -7.11308 | 0.00268  |
| 1 | -11.60929 | -7.76885 | -1.40761 |
| 1 | -9.88104  | -7.99273 | -1.19902 |
| 6 | -10.47189 | -3.87169 | 1.08021  |
| 1 | -10.44521 | -4.01391 | 2.15747  |
| 1 | -11.33359 | -4.4403  | 0.73121  |
| 6 | -10.71031 | -2.36812 | 0.79184  |
| 1 | -9.8326   | -1.81805 | 1.11691  |
| 6 | -11.91695 | -1.85671 | 1.60399  |
| 1 | -11.76853 | -2.01432 | 2.66772  |
| 1 | -12.07416 | -0.7942  | 1.44279  |
| 1 | -12.82602 | -2.37668 | 1.31357  |
| 6 | -10.91714 | -2.07899 | -0.70653 |
| 1 | -11.76612 | -2.63593 | -1.09422 |
| 1 | -11.11065 | -1.0235  | -0.86941 |
| 1 | -10.04314 | -2.3422  | -1.29029 |
| 6 | -3.35427  | 0.11749  | -0.01368 |
| 6 | -4.04661  | -0.04676 | 1.20811  |
| 6 | -3.69151  | 0.70364  | 2.36119  |
| 1 | -2.87237  | 1.38921  | 2.28751  |
| 6 | -4.35614  | 0.56358  | 3.55724  |
| 6 | -3.9922   | 1.32538  | 4.73537  |
| 1 | -3.17363  | 2.01533  | 4.66045  |
| 6 | -4.66239  | 1.16969  | 5.9012   |
| 1 | -4.38486  | 1.73389  | 6.77002  |
| 6 | -5.76276  | 0.23088  | 5.99538  |
| 1 | -6.27517  | 0.12498  | 6.93174  |
| 6 | -6.13689  | -0.50504 | 4.92251  |
| 1 | -6.94892  | -1.20304 | 4.99342  |
| 6 | -5.451    | -0.37488 | 3.65146  |
| 6 | -5.80746  | -1.11546 | 2.54796  |
| 1 | -6.61528  | -1.81393 | 2.62295  |
| 6 | -2.80951  | 5.11732  | -1.98563 |
| 6 | -2.69365  | 4.11466  | -2.94948 |
| 1 | -1.96435  | 3.33966  | -2.83356 |
| 6 | -3.54675  | 4.10513  | -4.05483 |
| 1 | -3.46117  | 3.3255   | -4.78514 |
| 6 | -4.51424  | 5.09688  | -4.19903 |
| 1 | -5.1716   | 5.08618  | -5.04593 |
| 6 | -4.63639  | 6.09915  | -3.23291 |
| 1 | -5.38686  | 6.85769  | -3.33616 |
| 6 | -3.78923  | 6.10698  | -2.12861 |

|    |          |          |          |
|----|----------|----------|----------|
| 1  | -3.90714 | 6.86822  | -1.38167 |
| 6  | -4.10628 | -2.84655 | -5.72065 |
| 1  | -4.36645 | -3.42303 | -6.58688 |
| 6  | -2.9998  | -1.91426 | -5.80606 |
| 1  | -2.46525 | -1.82609 | -6.7316  |
| 6  | -2.64408 | -1.17321 | -4.73078 |
| 1  | -1.82037 | -0.48712 | -4.78629 |
| 6  | -3.35642 | -1.28845 | -3.47393 |
| 6  | -2.71568 | 5.47025  | 0.94516  |
| 6  | -2.41741 | 6.49326  | 1.84764  |
| 1  | -1.57342 | 7.13486  | 1.68914  |
| 6  | -3.2142  | 6.6884   | 2.9768   |
| 1  | -2.97831 | 7.4765   | 3.66454  |
| 6  | -4.30843 | 5.8578   | 3.2116   |
| 1  | -4.9182  | 6.00342  | 4.08123  |
| 6  | -4.60464 | 4.82928  | 2.31495  |
| 1  | -5.4357  | 4.178    | 2.49714  |
| 6  | -3.81237 | 4.63522  | 1.18624  |
| 1  | -4.04416 | 3.83514  | 0.51233  |
| 78 | 7.38E-4  | 3.32615  | -0.35842 |
| 6  | 0.66984  | 6.68939  | -0.78064 |
| 6  | -0.6622  | 6.69113  | -0.7765  |
| 1  | 1.21223  | 7.60314  | -0.9543  |
| 1  | -1.20327 | 7.60628  | -0.94687 |

## PM6 (CIS=96) calculated spectra

### *Trans-Pt*

#### PM6 (CIS=96) calculated spectra of *trans-Pt* in the gas phase

| State | eV    | nm    | $\Delta\mu$ (Debye) | Osc.  |         |
|-------|-------|-------|---------------------|-------|---------|
| 1     | 0.000 | 0.0   |                     |       | Singlet |
| 2     | 1.287 | 963.4 | 1.08                |       | Triplet |
| 3     | 1.315 | 942.8 | 0.78                | 0.285 | Singlet |
| 4     | 1.315 | 942.6 | 0.98                |       | Triplet |
| 5     | 1.398 | 887.0 | 0.87                | 0.054 | Singlet |
| 6     | 1.737 | 713.7 | 1.16                | 0.001 | Singlet |
| 7     | 2.058 | 602.4 | 0.48                |       | Triplet |
| 8     | 2.128 | 582.5 | 1.00                | 0.045 | Singlet |
| 9     | 2.210 | 561.0 | 0.26                |       | Triplet |
| 10    | 2.352 | 527.0 | 0.83                | 0.047 | Singlet |
| 11    | 2.407 | 515.0 | 0.56                |       | Triplet |
| 12    | 2.451 | 505.9 | 0.49                |       | Triplet |
| 13    | 2.468 | 502.3 | 0.68                |       | Triplet |
| 14    | 2.549 | 486.4 | 0.23                |       | Triplet |
| 15    | 2.602 | 476.6 | 0.41                | 0.037 | Singlet |
| 16    | 2.631 | 471.3 | 0.40                | 0.073 | Singlet |
| 17    | 2.716 | 456.5 | 0.58                |       | Triplet |
| 18    | 2.770 | 447.6 | 0.84                | 0.318 | Singlet |
| 19    | 2.773 | 447.1 | 1.32                | 0.078 | Singlet |
| 20    | 2.785 | 445.2 | 0.47                |       | Triplet |
| 21    | 2.885 | 429.7 | 0.38                |       | Triplet |
| 22    | 2.886 | 429.6 | 0.36                |       | Triplet |
| 23    | 2.906 | 426.6 | 0.46                |       | Triplet |
| 24    | 3.048 | 406.8 | 0.45                |       | Triplet |
| 25    | 3.050 | 406.4 | 1.18                | 0.012 | Singlet |
| 26    | 3.060 | 405.2 | 0.08                |       | Triplet |
| 27    | 3.138 | 395.1 | 0.40                |       | Triplet |
| 28    | 3.162 | 392.2 | 0.24                |       | Triplet |
| 29    | 3.162 | 392.1 | 0.24                |       | Triplet |
| 30    | 3.231 | 383.7 | 0.69                |       | Triplet |
| 31    | 3.233 | 383.5 | 1.47                | 0.035 | Singlet |
| 32    | 3.234 | 383.4 | 0.87                |       | Triplet |
| 33    | 3.258 | 380.5 | 0.48                |       | Triplet |
| 34    | 3.308 | 374.8 | 0.73                | 0.018 | Singlet |



|    |       |       |      |       |         |
|----|-------|-------|------|-------|---------|
| 35 | 3.351 | 370.0 | 0.63 |       | Triplet |
| 36 | 3.357 | 369.3 | 1.48 | 0.533 | Singlet |
| 37 | 3.373 | 367.6 | 0.93 |       | Triplet |
| 38 | 3.373 | 367.5 | 0.90 |       | Triplet |
| 39 | 3.379 | 366.9 | 2.19 | 0.131 | Singlet |
| 40 | 3.400 | 364.6 | 8.78 |       | Triplet |
| 41 | 3.413 | 363.3 | 0.78 |       | Triplet |
| 42 | 3.426 | 361.9 | 0.59 |       | Triplet |
| 43 | 3.439 | 360.5 | 0.45 |       | Triplet |
| 44 | 3.443 | 360.0 | 0.33 |       | Triplet |
| 45 | 3.451 | 359.2 | 6.17 | 0.089 | Singlet |
| 46 | 3.494 | 354.9 | 8.00 |       | Triplet |
| 47 | 3.515 | 352.7 | 0.28 |       | Triplet |
| 48 | 3.519 | 352.3 | 1.21 |       | Triplet |
| 49 | 3.523 | 351.9 | 1.90 | 0.220 | Singlet |
| 50 | 3.530 | 351.3 | 1.18 |       | Triplet |
| 51 | 3.539 | 350.4 | 0.68 | 0.079 | Singlet |
| 52 | 3.543 | 349.9 | 5.02 | 0.039 | Singlet |
| 53 | 3.557 | 348.5 | 0.34 | 0.136 | Singlet |
| 54 | 3.589 | 345.5 | 1.60 |       | Triplet |
| 55 | 3.597 | 344.7 | 0.21 |       | Triplet |
| 56 | 3.634 | 341.2 | 2.24 | 0.111 | Singlet |
| 57 | 3.680 | 336.9 | 0.31 | 0.958 | Singlet |
| 58 | 3.695 | 335.6 | 0.44 |       | Triplet |
| 59 | 3.712 | 334.0 | 0.29 | 0.035 | Singlet |
| 60 | 3.712 | 334.0 | 0.42 | 0.006 | Singlet |
| 61 | 3.718 | 333.5 | 0.28 | 0.101 | Singlet |
| 62 | 3.720 | 333.3 | 0.16 | 0.146 | Singlet |
| 63 | 3.727 | 332.7 | 0.31 |       | Triplet |
| 64 | 3.731 | 332.3 | 0.54 | 0.006 | Singlet |
| 65 | 3.737 | 331.8 | 0.53 | 0.156 | Singlet |
| 66 | 3.761 | 329.6 | 0.20 | 0.008 | Singlet |
| 67 | 3.766 | 329.2 | 0.24 | 0.013 | Singlet |
| 68 | 3.784 | 327.6 | 3.44 | 0.060 | Singlet |
| 69 | 3.791 | 327.0 | 1.48 |       | Triplet |
| 70 | 3.795 | 326.7 | 0.19 | 0.290 | Singlet |
| 71 | 3.805 | 325.8 | 0.55 | 1.078 | Singlet |
| 72 | 3.819 | 324.7 | 0.17 |       | Triplet |
| 73 | 3.823 | 324.3 | 0.16 |       | Triplet |

|     |       |       |       |       |         |    |
|-----|-------|-------|-------|-------|---------|----|
| 74  | 3.836 | 323.2 | 1.13  |       | Triplet |    |
| 75  | 3.859 | 321.3 | 0.99  |       | Triplet |    |
| 76  | 3.860 | 321.2 | 0.95  |       | Triplet |    |
| 77  | 3.892 | 318.6 | 2.70  | 0.394 | Singlet |    |
| 78  | 3.893 | 318.5 | 2.29  |       | Triplet |    |
| 79  | 3.896 | 318.2 | 1.36  |       | Triplet |    |
| 80  | 3.935 | 315.1 | 1.68  |       | Triplet |    |
| 81  | 3.943 | 314.4 | 1.65  |       | Triplet |    |
| 82  | 3.945 | 314.2 | 0.62  |       | Triplet |    |
| 83  | 3.948 | 314.0 | 1.07  |       | Triplet |    |
| 84  | 3.977 | 311.8 | 1.34  | 0.146 | Singlet |    |
| 85  | 4.065 | 305.0 | 0.88  | 0.828 | Singlet |    |
| 86  | 4.131 | 300.1 | 1.25  | 0.208 | Singlet |    |
| 87  | 4.132 | 300.0 | 9.98  |       | Triplet |    |
| 88  | 4.150 | 298.7 | 1.43  |       | Triplet |    |
| 89  | 4.152 | 298.6 | 1.27  | 0.000 | Singlet |    |
| 90  | 4.178 | 296.8 | 1.27  |       | Triplet |    |
| 91  | 4.183 | 296.4 | 1.18  |       | Triplet |    |
| 92  | 4.229 | 293.2 | 0.48  |       | Triplet |    |
| 93  | 4.290 | 289.0 | 2.31  |       | Triplet |    |
| 94  | 4.300 | 288.3 | 2.09  | 0.052 | Singlet |    |
| 95  | 4.351 | 285.0 | 3.14  | 0.005 | Singlet |    |
| 96  | 4.368 | 283.8 | 8.17  |       | Triplet |    |
| 97  | 4.373 | 283.5 | 1.58  | 0.016 | Singlet |    |
| 98  | 4.401 | 281.7 | 1.25  |       | Triplet |    |
| 99  | 4.428 | 280.0 | 1.30  | 0.041 | Singlet |    |
| 100 | 4.452 | 278.5 | 3.62  |       | Triplet |    |
| 101 | 4.453 | 278.4 | 3.65  | 0.000 | Singlet |    |
| 102 | 4.462 | 277.8 | 13.60 |       | Triplet | CT |
| 103 | 4.470 | 277.4 | 8.31  | 0.030 | Singlet |    |
| 104 | 4.508 | 275.0 | 18.75 |       | Triplet | CT |
| 105 | 4.512 | 274.8 | 5.92  |       | Triplet |    |
| 106 | 4.512 | 274.8 | 5.27  | 0.001 | Singlet |    |
| 107 | 4.521 | 274.2 | 3.56  | 0.010 | Singlet |    |
| 108 | 4.522 | 274.2 | 5.43  |       | Triplet |    |
| 109 | 4.527 | 273.9 | 4.19  |       | Triplet |    |
| 110 | 4.540 | 273.1 | 2.13  |       | Triplet |    |
| 111 | 4.552 | 272.4 | 19.26 | 0.057 | Singlet | CT |
| 112 | 4.562 | 271.8 | 4.24  |       | Triplet |    |

|     |       |       |       |       |         |    |
|-----|-------|-------|-------|-------|---------|----|
| 113 | 4.562 | 271.7 | 1.75  | 0.068 | Singlet |    |
| 114 | 4.571 | 271.2 | 3.28  | 0.021 | Singlet |    |
| 115 | 4.571 | 271.2 | 3.29  |       | Triplet |    |
| 116 | 4.576 | 271.0 | 11.87 | 0.169 | Singlet | CT |
| 117 | 4.576 | 270.9 | 2.57  |       | Triplet |    |
| 118 | 4.594 | 269.9 | 16.14 | 0.010 | Singlet | CT |
| 119 | 4.600 | 269.5 | 7.40  |       | Triplet |    |
| 120 | 4.601 | 269.5 | 6.75  | 0.002 | Singlet |    |
| 121 | 4.612 | 268.8 | 1.82  |       | Triplet |    |
| 122 | 4.614 | 268.7 | 1.52  | 0.002 | Singlet |    |
| 123 | 4.622 | 268.2 | 6.53  | 0.002 | Singlet |    |
| 124 | 4.624 | 268.1 | 6.51  |       | Triplet |    |
| 125 | 4.649 | 266.7 | 4.33  | 0.109 | Singlet |    |
| 126 | 4.650 | 266.6 | 10.09 |       | Triplet | CT |
| 127 | 4.654 | 266.4 | 13.12 |       | Triplet | CT |
| 128 | 4.665 | 265.8 | 3.06  |       | Triplet |    |
| 129 | 4.676 | 265.1 | 1.68  | 0.557 | Singlet |    |
| 130 | 4.694 | 264.1 | 8.88  |       | Triplet |    |
| 131 | 4.701 | 263.8 | 8.35  |       | Triplet |    |
| 132 | 4.716 | 262.9 | 7.29  |       | Triplet |    |
| 133 | 4.717 | 262.9 | 7.25  | 0.000 | Singlet |    |
| 134 | 4.717 | 262.8 | 6.01  |       | Triplet |    |
| 135 | 4.718 | 262.8 | 6.09  | 0.006 | Singlet |    |
| 136 | 4.730 | 262.1 | 2.80  | 0.117 | Singlet |    |
| 137 | 4.738 | 261.7 | 3.42  |       | Triplet |    |
| 138 | 4.748 | 261.1 | 0.73  | 0.063 | Singlet |    |
| 139 | 4.771 | 259.8 | 3.99  |       | Triplet |    |
| 140 | 4.772 | 259.8 | 6.14  | 0.029 | Singlet |    |
| 141 | 4.773 | 259.7 | 14.60 |       | Triplet | CT |
| 142 | 4.776 | 259.6 | 15.47 | 0.069 | Singlet | CT |
| 143 | 4.782 | 259.3 | 20.44 |       | Triplet | CT |
| 144 | 4.782 | 259.3 | 19.71 | 0.001 | Singlet | CT |
| 145 | 4.787 | 259.0 | 7.64  | 0.185 | Singlet |    |
| 146 | 4.793 | 258.7 | 7.12  |       | Triplet |    |
| 147 | 4.804 | 258.1 | 0.74  |       | Triplet |    |
| 148 | 4.823 | 257.0 | 7.45  | 0.022 | Singlet |    |
| 149 | 4.824 | 257.0 | 7.82  |       | Triplet |    |
| 150 | 4.826 | 256.9 | 1.97  | 0.288 | Singlet |    |
| 151 | 4.851 | 255.6 | 22.70 |       | Triplet | CT |

|     |       |       |       |       |         |
|-----|-------|-------|-------|-------|---------|
| 152 | 4.851 | 255.6 | 22.65 | 0.000 | Singlet |
| 153 | 4.853 | 255.4 | 24.50 |       | Triplet |
| 154 | 4.854 | 255.4 | 24.46 | 0.000 | Singlet |
| 155 | 4.917 | 252.2 | 6.56  | 0.025 | Singlet |
| 156 | 4.917 | 252.1 | 7.04  |       | Triplet |
| 157 | 4.925 | 251.7 | 3.85  | 0.127 | Singlet |
| 158 | 4.935 | 251.2 | 7.90  | 0.004 | Singlet |
| 159 | 4.937 | 251.1 | 7.07  |       | Triplet |
| 160 | 4.956 | 250.1 | 5.40  | 0.526 | Singlet |
| 161 | 4.966 | 249.7 | 7.21  | 0.021 | Singlet |
| 162 | 4.968 | 249.6 | 7.35  |       | Triplet |
| 163 | 4.974 | 249.2 | 10.46 | 0.002 | Singlet |
| 164 | 4.974 | 249.2 | 11.76 |       | Triplet |
| 165 | 4.977 | 249.1 | 13.09 | 0.002 | Singlet |

CT  
CT  
CT

**PM6 (CIS=96) calculated spectra of *trans*-Pt in benzonitrile**

| State | eV    | nm    | $\Delta\mu$ (Debye) | Osc.  |         |
|-------|-------|-------|---------------------|-------|---------|
| 1     | 0     | 0     |                     |       | Singlet |
| 2     | 1.275 | 972.7 | 1.27                |       | Triplet |
| 3     | 1.326 | 935.2 | 0.97                |       | Triplet |
| 4     | 1.347 | 920.5 | 1                   | 0.258 | Singlet |
| 5     | 1.449 | 855.8 | 0.86                | 0.076 | Singlet |
| 6     | 1.734 | 714.9 | 0.89                | 0.001 | Singlet |
| 7     | 2.065 | 600.5 | 0.55                |       | Triplet |
| 8     | 2.086 | 594.3 | 0.58                | 0.06  | Singlet |
| 9     | 2.265 | 547.4 | 0.33                |       | Triplet |
| 10    | 2.358 | 525.7 | 1.09                | 0.03  | Singlet |
| 11    | 2.385 | 519.9 | 0.7                 |       | Triplet |
| 12    | 2.414 | 513.7 | 0.59                |       | Triplet |
| 13    | 2.493 | 497.4 | 0.93                |       | Triplet |
| 14    | 2.572 | 482.1 | 0.85                | 0.035 | Singlet |
| 15    | 2.583 | 480   | 0.74                |       | Triplet |
| 16    | 2.638 | 469.9 | 1.25                | 0.012 | Singlet |
| 17    | 2.643 | 469   | 0.55                |       | Triplet |
| 18    | 2.708 | 457.9 | 0.14                |       | Triplet |
| 19    | 2.74  | 452.5 | 1.85                | 0.265 | Singlet |
| 20    | 2.846 | 435.7 | 13.64               |       | Triplet |
| 21    | 2.863 | 433.1 | 0.73                | 0.117 | Singlet |

CT

|    |       |       |       |       |         |    |
|----|-------|-------|-------|-------|---------|----|
| 22 | 2.884 | 429.9 | 0.32  |       | Triplet |    |
| 23 | 2.891 | 428.8 | 0.32  |       | Triplet |    |
| 24 | 2.909 | 426.1 | 0.58  |       | Triplet |    |
| 25 | 2.917 | 425.1 | 13.06 | 0.067 | Singlet | CT |
| 26 | 3.025 | 409.8 | 1.26  |       | Triplet |    |
| 27 | 3.048 | 406.7 | 0.33  |       | Triplet |    |
| 28 | 3.052 | 406.3 | 1     | 0.035 | Singlet |    |
| 29 | 3.107 | 399   | 4.16  |       | Triplet |    |
| 30 | 3.116 | 397.8 | 0.2   |       | Triplet |    |
| 31 | 3.128 | 396.4 | 1.14  |       | Triplet |    |
| 32 | 3.186 | 389.1 | 5.41  |       | Triplet |    |
| 33 | 3.201 | 387.3 | 7.61  | 0.064 | Singlet |    |
| 34 | 3.215 | 385.6 | 0.24  |       | Triplet |    |
| 35 | 3.249 | 381.6 | 5.39  |       | Triplet |    |
| 36 | 3.263 | 379.9 | 0.54  |       | Triplet |    |
| 37 | 3.275 | 378.6 | 7.35  | 0.021 | Singlet |    |
| 38 | 3.346 | 370.5 | 1.07  | 0.019 | Singlet |    |
| 39 | 3.364 | 368.5 | 0.89  |       | Triplet |    |
| 40 | 3.376 | 367.2 | 0.42  |       | Triplet |    |
| 41 | 3.376 | 367.2 | 0.77  |       | Triplet |    |
| 42 | 3.397 | 365   | 1.4   | 0.052 | Singlet |    |
| 43 | 3.419 | 362.6 | 0.57  |       | Triplet |    |
| 44 | 3.445 | 359.9 | 1.92  |       | Triplet |    |
| 45 | 3.456 | 358.7 | 0.16  |       | Triplet |    |
| 46 | 3.467 | 357.6 | 0.35  |       | Triplet |    |
| 47 | 3.484 | 355.8 | 0.8   | 0.156 | Singlet |    |
| 48 | 3.493 | 354.9 | 0.74  |       | Triplet |    |
| 49 | 3.501 | 354.1 | 0.45  | 0.939 | Singlet |    |
| 50 | 3.517 | 352.5 | 3.16  | 0.636 | Singlet |    |
| 51 | 3.53  | 351.3 | 0.51  |       | Triplet |    |
| 52 | 3.559 | 348.4 | 1.34  |       | Triplet |    |
| 53 | 3.605 | 343.9 | 0.17  |       | Triplet |    |
| 54 | 3.61  | 343.5 | 1.4   |       | Triplet |    |
| 55 | 3.628 | 341.8 | 2.95  | 0.055 | Singlet | CT |
| 56 | 3.647 | 339.9 | 0.49  |       | Triplet |    |
| 57 | 3.679 | 337   | 0.57  | 0.127 | Singlet |    |
| 58 | 3.685 | 336.5 | 0.41  |       | Triplet | CT |
| 59 | 3.687 | 336.2 | 0.34  | 0.436 | Singlet |    |
| 60 | 3.704 | 334.7 | 0.32  | 0.202 | Singlet |    |

|    |       |       |       |       |         |    |
|----|-------|-------|-------|-------|---------|----|
| 61 | 3.71  | 334.2 | 0.24  | 0.076 | Singlet |    |
| 62 | 3.714 | 333.8 | 0.34  | 0.045 | Singlet |    |
| 63 | 3.716 | 333.6 | 0.28  | 0.113 | Singlet | CT |
| 64 | 3.725 | 332.8 | 0.41  | 0.146 | Singlet |    |
| 65 | 3.743 | 331.2 | 0.64  | 0.043 | Singlet |    |
| 66 | 3.749 | 330.7 | 0.45  | 0.002 | Singlet |    |
| 67 | 3.775 | 328.4 | 0.63  | 0.009 | Singlet |    |
| 68 | 3.776 | 328.3 | 3.43  |       | Triplet | CT |
| 69 | 3.785 | 327.6 | 6.17  | 0.069 | Singlet |    |
| 70 | 3.794 | 326.8 | 0.9   |       | Triplet |    |
| 71 | 3.797 | 326.5 | 0.87  | 0.956 | Singlet |    |
| 72 | 3.801 | 326.2 | 1.15  |       | Triplet |    |
| 73 | 3.824 | 324.2 | 1.44  |       | Triplet |    |
| 74 | 3.83  | 323.7 | 1.18  |       | Triplet | CT |
| 75 | 3.832 | 323.6 | 4.32  | 0.05  | Singlet | CT |
| 76 | 3.834 | 323.3 | 2.79  |       | Triplet |    |
| 77 | 3.86  | 321.2 | 4.32  | 0.656 | Singlet | CT |
| 78 | 3.879 | 319.6 | 2.69  |       | Triplet | CT |
| 79 | 3.886 | 319.1 | 1.33  |       | Triplet | CT |
| 80 | 3.908 | 317.3 | 0.88  |       | Triplet | CT |
| 81 | 3.914 | 316.8 | 3.09  | 0.023 | Singlet |    |
| 82 | 3.921 | 316.2 | 1.1   |       | Triplet |    |
| 83 | 3.926 | 315.8 | 1.19  |       | Triplet |    |
| 84 | 4.077 | 304.1 | 15.35 |       | Triplet | CT |
| 85 | 4.079 | 303.9 | 15.26 | 0.006 | Singlet | CT |
| 86 | 4.092 | 303   | 11.06 |       | Triplet | CT |
| 87 | 4.094 | 302.9 | 2.03  |       | Triplet | CT |
| 88 | 4.109 | 301.7 | 1.3   | 0.056 | Singlet | CT |
| 89 | 4.129 | 300.3 | 3.33  | 0.869 | Singlet | CT |
| 90 | 4.177 | 296.8 | 7.55  |       | Triplet | CT |
| 92 | 4.224 | 293.5 | 23.11 | 0     | Singlet | CT |
| 91 | 4.224 | 293.5 | 20.24 |       | Triplet | CT |
| 93 | 4.225 | 293.4 | 1.77  |       | Triplet |    |
| 94 | 4.227 | 293.3 | 0.97  |       | Triplet | CT |
| 95 | 4.277 | 289.9 | 7.49  |       | Triplet | CT |
| 96 | 4.278 | 289.8 | 7.71  | 0.001 | Singlet | CT |
| 97 | 4.288 | 289.2 | 6.19  |       | Triplet | CT |
| 98 | 4.328 | 286.5 | 2.16  |       | Triplet | CT |
| 99 | 4.365 | 284   | 28.53 |       | Triplet | CT |

|     |       |       |       |       |         |    |
|-----|-------|-------|-------|-------|---------|----|
| 100 | 4.379 | 283.1 | 0.99  |       | Triplet | CT |
| 101 | 4.382 | 282.9 | 31.27 | 0.007 | Singlet | CT |
| 102 | 4.393 | 282.2 | 3.69  | 0.005 | Singlet |    |
| 103 | 4.395 | 282.1 | 3.4   |       | Triplet |    |
| 104 | 4.414 | 280.9 | 1.32  | 0.019 | Singlet |    |
| 105 | 4.419 | 280.6 | 1.05  | 0.067 | Singlet |    |
| 106 | 4.448 | 278.7 | 5.16  |       | Triplet |    |
| 107 | 4.461 | 277.9 | 2.9   | 0.137 | Singlet | CT |
| 108 | 4.481 | 276.7 | 3.79  | 0.011 | Singlet | CT |
| 109 | 4.482 | 276.6 | 8.9   |       | Triplet |    |
| 110 | 4.484 | 276.5 | 7.59  | 0.004 | Singlet |    |
| 111 | 4.485 | 276.4 | 23.16 |       | Triplet | CT |
| 112 | 4.487 | 276.3 | 13.3  | 0.014 | Singlet |    |
| 113 | 4.5   | 275.5 | 0.29  |       | Triplet |    |
| 114 | 4.524 | 274.1 | 5.27  | 0.003 | Singlet |    |
| 115 | 4.526 | 273.9 | 5.85  |       | Triplet | CT |
| 116 | 4.533 | 273.5 | 8.77  |       | Triplet | CT |
| 117 | 4.539 | 273.1 | 11.77 | 0.003 | Singlet | CT |
| 118 | 4.541 | 273   | 8.29  |       | Triplet | CT |
| 119 | 4.549 | 272.6 | 3.35  | 0.049 | Singlet |    |
| 120 | 4.554 | 272.2 | 11.68 | 0.026 | Singlet | CT |
| 121 | 4.565 | 271.6 | 9.22  |       | Triplet | CT |
| 122 | 4.567 | 271.5 | 3.26  |       | Triplet | CT |
| 123 | 4.57  | 271.3 | 8.82  | 0.013 | Singlet | CT |
| 124 | 4.572 | 271.2 | 3.67  |       | Triplet |    |
| 125 | 4.585 | 270.4 | 21.12 |       | Triplet | CT |
| 126 | 4.608 | 269   | 10.37 |       | Triplet |    |
| 127 | 4.611 | 268.9 | 5.52  | 0.07  | Singlet |    |
| 128 | 4.614 | 268.7 | 8.46  |       | Triplet |    |
| 129 | 4.615 | 268.6 | 5.08  | 0.043 | Singlet | CT |
| 130 | 4.646 | 266.8 | 8.04  | 1.182 | Singlet | CT |
| 131 | 4.663 | 265.9 | 21.89 | 0.008 | Singlet | CT |
| 132 | 4.664 | 265.8 | 7.63  | 0.386 | Singlet | CT |
| 133 | 4.67  | 265.5 | 9.41  |       | Triplet | CT |
| 134 | 4.682 | 264.8 | 2.67  | 0.519 | Singlet | CT |
| 135 | 4.701 | 263.7 | 7.78  |       | Triplet | CT |
| 136 | 4.702 | 263.6 | 8.01  | 0.021 | Singlet |    |
| 137 | 4.716 | 262.9 | 8.05  | 0.061 | Singlet |    |
| 138 | 4.724 | 262.4 | 12.2  |       | Triplet |    |

|     |       |       |       |       |         |    |
|-----|-------|-------|-------|-------|---------|----|
| 139 | 4.733 | 262   | 0.96  |       | Triplet |    |
| 140 | 4.745 | 261.3 | 3.98  |       | Triplet |    |
| 141 | 4.755 | 260.7 | 3.11  |       | Triplet |    |
| 142 | 4.763 | 260.3 | 20.94 |       | Triplet | CT |
| 143 | 4.778 | 259.5 | 0.72  | 0.125 | Singlet |    |
| 144 | 4.78  | 259.4 | 21.13 | 0.001 | Singlet | CT |
| 145 | 4.78  | 259.4 | 19.47 |       | Triplet | CT |
| 146 | 4.805 | 258   | 5.96  | 1.344 | Singlet |    |
| 147 | 4.812 | 257.7 | 9.33  | 0.139 | Singlet |    |
| 148 | 4.813 | 257.6 | 17.35 |       | Triplet | CT |
| 149 | 4.814 | 257.6 | 23.5  | 0.001 | Singlet |    |
| 150 | 4.814 | 257.6 | 7.23  |       | Triplet |    |
| 151 | 4.82  | 257.2 | 14.92 |       | Triplet | CT |
| 153 | 4.825 | 257   | 11.14 | 0.134 | Singlet |    |
| 152 | 4.825 | 257   | 13.4  |       | Triplet | CT |
| 154 | 4.826 | 256.9 | 10.22 | 0.036 | Singlet | CT |
| 155 | 4.83  | 256.7 | 13.2  |       | Triplet |    |
| 156 | 4.843 | 256   | 18.97 | 0.018 | Singlet | CT |
| 157 | 4.845 | 255.9 | 18.28 |       | Triplet | CT |
| 158 | 4.865 | 254.8 | 9.44  | 0.476 | Singlet |    |
| 159 | 4.874 | 254.4 | 22.52 | 0.267 | Singlet | CT |
| 160 | 4.876 | 254.3 | 4.2   |       | Triplet |    |
| 162 | 4.885 | 253.8 | 12.1  | 0.023 | Singlet |    |
| 161 | 4.885 | 253.8 | 12.65 |       | Triplet |    |
| 163 | 4.899 | 253.1 | 11.19 | 0.015 | Singlet |    |
| 164 | 4.901 | 253   | 11.34 |       | Triplet |    |
| 165 | 4.911 | 252.4 | 16.18 |       | Triplet | CT |
| 166 | 4.915 | 252.2 | 16.16 | 0.022 | Singlet | CT |
| 167 | 4.92  | 252   | 3.2   |       | Triplet |    |
| 168 | 4.932 | 251.4 | 5.78  | 0.149 | Singlet |    |
| 169 | 4.935 | 251.2 | 8.42  |       | Triplet |    |
| 170 | 4.938 | 251.1 | 8.25  | 0.269 | Singlet |    |
| 171 | 4.946 | 250.7 | 1.11  | 0.616 | Singlet |    |
| 172 | 4.964 | 249.8 | 19.06 | 0.019 | Singlet | CT |
| 173 | 4.964 | 249.8 | 22.56 |       | Triplet | CT |
| 174 | 4.969 | 249.5 | 1.31  | 0.094 | Singlet |    |
| 175 | 4.975 | 249.2 | 20.4  |       | Triplet | CT |
| 176 | 4.984 | 248.8 | 4.19  |       | Triplet |    |
| 177 | 4.992 | 248.3 | 8.92  |       | Triplet |    |



|     |       |       |      |       |         |
|-----|-------|-------|------|-------|---------|
| 178 | 4.993 | 248.3 | 6.7  | 0.063 | Singlet |
| 179 | 4.995 | 248.2 | 8.67 | 0.317 | Singlet |

## Cis-Pt

### PM6 (CIS=96) calculated spectra of *cis*-Pt in the gas phase

| State | eV    | nm     | $\Delta\mu$ (Debye) | Osc.  |         |
|-------|-------|--------|---------------------|-------|---------|
| 1     | 0.000 | 0.0    |                     |       | Singlet |
| 2     | 0.931 | 1331.4 | 1.21                |       | Triplet |
| 3     | 1.332 | 930.7  | 0.93                |       | Triplet |
| 4     | 1.446 | 857.7  | 1.83                | 0.256 | Singlet |
| 5     | 1.727 | 718.1  | 0.51                |       | Triplet |
| 6     | 2.091 | 592.8  | 0.48                |       | Triplet |
| 7     | 2.173 | 570.6  | 0.48                |       | Triplet |
| 8     | 2.183 | 568.0  | 1.69                | 0.331 | Singlet |
| 9     | 2.375 | 522.1  | 1.46                | 0.006 | Singlet |
| 10    | 2.409 | 514.7  | 1.40                | 0.022 | Singlet |
| 11    | 2.434 | 509.3  | 0.27                |       | Triplet |
| 12    | 2.452 | 505.7  | 0.58                |       | Triplet |
| 13    | 2.487 | 498.5  | 0.26                |       | Triplet |
| 14    | 2.616 | 474.0  | 0.54                | 0.021 | Singlet |
| 15    | 2.659 | 466.2  | 0.31                | 0.026 | Singlet |
| 16    | 2.680 | 462.7  | 0.50                |       | Triplet |
| 17    | 2.731 | 454.0  | 0.49                |       | Triplet |
| 18    | 2.774 | 446.9  | 0.66                |       | Triplet |
| 19    | 2.837 | 437.0  | 0.93                | 0.001 | Singlet |
| 20    | 2.914 | 425.4  | 0.37                |       | Triplet |
| 21    | 2.949 | 420.4  | 0.95                | 0.041 | Singlet |
| 22    | 2.954 | 419.8  | 0.25                |       | Triplet |
| 23    | 2.955 | 419.5  | 0.47                |       | Triplet |
| 24    | 2.957 | 419.3  | 0.21                |       | Triplet |
| 25    | 3.035 | 408.5  | 0.73                |       | Triplet |
| 26    | 3.127 | 396.5  | 1.00                | 0.008 | Singlet |
| 27    | 3.151 | 393.4  | 0.34                |       | Triplet |
| 28    | 3.231 | 383.7  | 0.48                |       | Triplet |
| 29    | 3.241 | 382.6  | 1.19                |       | Triplet |
| 30    | 3.247 | 381.8  | 1.52                | 0.049 | Singlet |
| 31    | 3.262 | 380.1  | 1.21                |       | Triplet |
| 32    | 3.267 | 379.5  | 0.45                |       | Triplet |
| 33    | 3.305 | 375.1  | 0.76                | 0.045 | Singlet |
| 34    | 3.329 | 372.4  | 1.00                |       | Triplet |
| 35    | 3.420 | 362.5  | 1.02                | 0.126 | Singlet |

|    |       |       |       |       |         |    |
|----|-------|-------|-------|-------|---------|----|
| 36 | 3.427 | 361.7 | 1.73  |       | Triplet |    |
| 37 | 3.463 | 358.0 | 0.54  |       | Triplet |    |
| 38 | 3.476 | 356.7 | 0.79  |       | Triplet |    |
| 39 | 3.550 | 349.2 | 0.99  |       | Triplet |    |
| 40 | 3.552 | 349.1 | 2.70  | 0.033 | Singlet |    |
| 41 | 3.612 | 343.2 | 0.42  | 0.004 | Singlet |    |
| 42 | 3.631 | 341.4 | 0.93  |       | Triplet |    |
| 43 | 3.632 | 341.4 | 0.08  | 0.003 | Singlet |    |
| 44 | 3.639 | 340.7 | 0.47  |       | Triplet |    |
| 45 | 3.646 | 340.0 | 2.66  |       | Triplet |    |
| 46 | 3.663 | 338.5 | 0.56  | 0.099 | Singlet |    |
| 47 | 3.684 | 336.6 | 1.42  |       | Triplet |    |
| 48 | 3.692 | 335.8 | 0.07  | 0.007 | Singlet |    |
| 49 | 3.698 | 335.3 | 0.07  | 0.011 | Singlet |    |
| 50 | 3.708 | 334.4 | 0.91  | 0.038 | Singlet |    |
| 51 | 3.710 | 334.2 | 2.49  |       | Triplet |    |
| 52 | 3.714 | 333.8 | 3.27  |       | Triplet |    |
| 53 | 3.724 | 332.9 | 2.25  | 0.151 | Singlet |    |
| 54 | 3.742 | 331.3 | 1.02  | 0.139 | Singlet |    |
| 55 | 3.746 | 331.0 | 11.40 |       | Triplet | CT |
| 56 | 3.783 | 327.7 | 2.49  | 0.083 | Singlet |    |
| 57 | 3.786 | 327.5 | 2.97  | 0.001 | Singlet |    |
| 58 | 3.815 | 325.0 | 12.32 |       | Triplet | CT |
| 59 | 3.817 | 324.8 | 8.24  | 0.322 | Singlet |    |
| 60 | 3.819 | 324.7 | 2.49  | 0.734 | Singlet |    |
| 61 | 3.823 | 324.3 | 2.38  |       | Triplet |    |
| 62 | 3.825 | 324.1 | 0.50  |       | Triplet |    |
| 63 | 3.831 | 323.6 | 10.41 |       | Triplet | CT |
| 64 | 3.836 | 323.2 | 3.95  | 0.338 | Singlet |    |
| 65 | 3.837 | 323.1 | 0.41  |       | Triplet |    |
| 66 | 3.839 | 323.0 | 2.14  |       | Triplet |    |
| 67 | 3.862 | 321.0 | 0.31  |       | Triplet |    |
| 68 | 3.879 | 319.6 | 10.78 | 1.055 | Singlet | CT |
| 69 | 3.880 | 319.6 | 6.41  |       | Triplet |    |
| 70 | 3.890 | 318.7 | 2.29  |       | Triplet |    |
| 71 | 3.895 | 318.3 | 1.60  |       | Triplet |    |
| 72 | 3.914 | 316.8 | 5.57  | 1.020 | Singlet |    |
| 73 | 3.967 | 312.5 | 3.02  | 0.127 | Singlet |    |
| 74 | 3.983 | 311.3 | 14.86 |       | Triplet | CT |

|     |       |       |       |       |         |    |
|-----|-------|-------|-------|-------|---------|----|
| 75  | 3.985 | 311.1 | 14.85 | 0.015 | Singlet | CT |
| 76  | 4.003 | 309.7 | 1.06  | 1.386 | Singlet |    |
| 77  | 4.014 | 308.8 | 11.62 | 0.036 | Singlet | CT |
| 78  | 4.020 | 308.4 | 11.92 |       | Triplet | CT |
| 79  | 4.054 | 305.8 | 15.86 |       | Triplet | CT |
| 80  | 4.055 | 305.8 | 15.42 | 0.007 | Singlet | CT |
| 81  | 4.066 | 304.9 | 3.34  |       | Triplet |    |
| 82  | 4.081 | 303.8 | 2.79  | 0.462 | Singlet |    |
| 83  | 4.132 | 300.1 | 0.89  | 0.110 | Singlet |    |
| 84  | 4.150 | 298.8 | 3.67  |       | Triplet |    |
| 85  | 4.160 | 298.0 | 6.28  |       | Triplet |    |
| 86  | 4.201 | 295.1 | 6.49  |       | Triplet |    |
| 87  | 4.220 | 293.8 | 28.34 | 0.010 | Singlet | CT |
| 88  | 4.230 | 293.1 | 27.80 |       | Triplet | CT |
| 89  | 4.234 | 292.8 | 28.28 | 0.019 | Singlet | CT |
| 90  | 4.237 | 292.6 | 23.72 |       | Triplet | CT |
| 91  | 4.267 | 290.6 | 23.07 | 0.026 | Singlet | CT |
| 92  | 4.272 | 290.2 | 21.83 |       | Triplet | CT |
| 93  | 4.285 | 289.4 | 4.89  | 0.066 | Singlet |    |
| 94  | 4.354 | 284.7 | 25.35 |       | Triplet | CT |
| 95  | 4.355 | 284.7 | 25.34 | 0.006 | Singlet | CT |
| 96  | 4.364 | 284.1 | 14.14 | 0.017 | Singlet | CT |
| 97  | 4.370 | 283.7 | 26.65 |       | Triplet | CT |
| 98  | 4.371 | 283.6 | 11.50 | 0.025 | Singlet | CT |
| 99  | 4.389 | 282.5 | 26.01 |       | Triplet | CT |
| 100 | 4.391 | 282.3 | 26.09 | 0.002 | Singlet | CT |
| 101 | 4.431 | 279.8 | 0.77  |       | Triplet |    |
| 102 | 4.456 | 278.3 | 0.74  | 0.065 | Singlet |    |
| 103 | 4.464 | 277.7 | 0.25  | 0.035 | Singlet |    |
| 104 | 4.472 | 277.2 | 3.58  |       | Triplet |    |
| 105 | 4.510 | 274.9 | 1.54  |       | Triplet |    |
| 106 | 4.516 | 274.5 | 2.74  |       | Triplet |    |
| 107 | 4.549 | 272.5 | 30.41 | 0.004 | Singlet | CT |
| 108 | 4.549 | 272.5 | 29.35 |       | Triplet | CT |
| 109 | 4.561 | 271.8 | 2.34  |       | Triplet |    |
| 110 | 4.574 | 271.1 | 1.08  |       | Triplet |    |
| 111 | 4.577 | 270.9 | 1.09  |       | Triplet |    |
| 112 | 4.581 | 270.6 | 1.19  | 0.014 | Singlet |    |
| 113 | 4.619 | 268.4 | 0.65  |       | Triplet |    |

|     |       |       |       |       |         |    |
|-----|-------|-------|-------|-------|---------|----|
| 114 | 4.632 | 267.7 | 3.70  | 0.159 | Singlet |    |
| 115 | 4.665 | 265.8 | 27.58 | 0.008 | Singlet | CT |
| 116 | 4.669 | 265.6 | 27.88 | 0.003 | Singlet | CT |
| 117 | 4.671 | 265.4 | 27.70 |       | Triplet | CT |
| 118 | 4.672 | 265.4 | 27.89 |       | Triplet | CT |
| 119 | 4.694 | 264.1 | 4.29  | 0.166 | Singlet |    |
| 120 | 4.716 | 262.9 | 28.19 | 0.002 | Singlet | CT |
| 121 | 4.716 | 262.9 | 28.17 |       | Triplet | CT |
| 122 | 4.719 | 262.7 | 28.20 | 0.001 | Singlet | CT |
| 123 | 4.719 | 262.7 | 28.20 |       | Triplet | CT |
| 124 | 4.769 | 260.0 | 4.04  | 0.242 | Singlet |    |
| 125 | 4.781 | 259.3 | 4.49  |       | Triplet |    |
| 126 | 4.787 | 259.0 | 2.14  |       | Triplet |    |
| 127 | 4.791 | 258.8 | 6.52  |       | Triplet |    |
| 128 | 4.804 | 258.1 | 5.55  | 0.237 | Singlet |    |
| 129 | 4.805 | 258.0 | 12.15 |       | Triplet | CT |
| 130 | 4.808 | 257.8 | 12.20 | 0.004 | Singlet | CT |
| 131 | 4.842 | 256.1 | 5.03  | 0.002 | Singlet |    |
| 132 | 4.842 | 256.0 | 18.99 |       | Triplet | CT |
| 133 | 4.850 | 255.6 | 18.34 | 0.001 | Singlet | CT |
| 134 | 4.880 | 254.1 | 25.63 |       | Triplet | CT |
| 135 | 4.885 | 253.8 | 26.38 | 0.013 | Singlet | CT |
| 136 | 4.887 | 253.7 | 9.62  | 0.011 | Singlet |    |
| 137 | 4.888 | 253.7 | 8.94  |       | Triplet |    |
| 138 | 4.901 | 253.0 | 6.98  | 0.023 | Singlet |    |
| 139 | 4.902 | 252.9 | 8.89  |       | Triplet |    |
| 140 | 4.911 | 252.4 | 6.25  | 0.011 | Singlet |    |
| 141 | 4.912 | 252.4 | 8.76  |       | Triplet |    |
| 143 | 4.927 | 251.6 | 6.67  | 0.002 | Singlet |    |
| 142 | 4.927 | 251.6 | 5.95  |       | Triplet |    |
| 144 | 4.934 | 251.3 | 2.41  |       | Triplet |    |
| 145 | 4.941 | 250.9 | 4.71  | 0.094 | Singlet |    |
| 146 | 4.948 | 250.6 | 3.73  | 0.119 | Singlet |    |
| 147 | 4.949 | 250.5 | 4.82  |       | Triplet |    |
| 148 | 4.953 | 250.3 | 3.28  | 0.082 | Singlet |    |
| 149 | 4.956 | 250.2 | 9.26  |       | Triplet |    |
| 150 | 4.964 | 249.8 | 4.36  | 0.017 | Singlet |    |
| 151 | 4.966 | 249.7 | 10.85 |       | Triplet | CT |
| 152 | 4.967 | 249.6 | 5.33  |       | Triplet |    |

|     |       |       |       |       |         |    |
|-----|-------|-------|-------|-------|---------|----|
| 153 | 4.978 | 249.1 | 10.27 | 0.015 | Singlet | CT |
| 154 | 4.978 | 249.0 | 13.47 |       | Triplet | CT |
| 155 | 4.979 | 249.0 | 5.55  | 0.103 | Singlet |    |
| 156 | 4.984 | 248.7 | 13.55 |       | Triplet | CT |
| 157 | 4.985 | 248.7 | 14.29 | 0.006 | Singlet | CT |
| 158 | 4.992 | 248.4 | 3.57  | 0.028 | Singlet |    |
| 159 | 4.999 | 248.0 | 3.53  | 0.045 | Singlet |    |

## References

1. D. Lehnherr, A. H. Murray, R. McDonald and R. R. Tykwinski, *Angew. Chem. Int. Ed.*, 2010, **49**, 6190-6194.
2. K. Campbell, R. McDonald, M. J. Ferguson and R. R. Tykwinski, *J. Organomet. Chem.*, 2003, **683**, 379-387.
3. W. M. Khairul, M. A. Fox, N. N. Zaitseva, M. Gaudio, D. S. Yufit, B. W. Skelton, A. H. White, J. A. K. Howard, M. I. Bruce and P. J. Low, *Dalton Transactions*, 2009, DOI: 10.1039/B809960J, 610-620.
4. S. L. Murov, I. Carmichael and G. L. Hug, *Handbook of Photochemistry*, Marcel Dekker, 2 edn., 1993.
5. R. M. Young, S. M. Dyar, J. C. Barnes, M. Juríček, J. F. Stoddart, D. T. Co and M. R. Wasielewski, *J. Phys. Chem. A*, 2013, **117**, 12438-12448.
6. H. Hikawa, M. Oguni and H. Suga, *J. Non-Cryst. Solids*, 1988, **101**, 90-100.
7. M. Oguni, H. Hikawa and H. Suga, *Thermochim. Acta*, 1990, **158**, 143-156.
8. C. M. Mauck, R. M. Young and M. R. Wasielewski, *J. Phys. Chem. A*, 2017, **121**, 784-792.
9. I. H. M. van Stokkum, D. S. Larsen and R. van Grondelle, *Biochim. Biophys. Acta - Bioenergetics*, 2004, **1657**, 82-104.
10. J. J. Snellenburg, S. Laptinok, R. Seger, K. M. Mullen and I. H. M. van Stokkum, *J. Stat. Softw.*, 2012, **49**, 1-22.
11. K. M. Mullen and I. H. Van Stokkum, *J. Stat. Softw.*, 2007, **18**, 1-46.
12. S. Stoll and A. Schweiger, *J Magn Reson*, 2006, **178**, 42-55.
13. T. H. J. Dunning and P. J. Hay, *Gaussian Basis Sets for Molecular Calculations*, in *Methods of Electronic Structure Theory*, ed. H. F. Schaefer III., Springer, 1 edn., 1977, pp. 1-28.
14. P. J. Hay and W. R. Wadt, *J. Chem. Phys.*, 1985, **82**, 270-283.
15. Frisch, M. J.; Trucks, G. W.; Schlegel, H. B.; Scuseria, G. E.; Robb, M. A.; Cheeseman, J. R.; Scalmani, G.; Barone, V.; Petersson, G. A.; Nakatsuji, H.; Li, X.; Caricato, M.; Marenich, A. V.; Bloino, J.; Janesko, B. G.; Gomperts, R.; Mennucci, B.; Hratchian, H. P.; Ortiz, J. V.; Izmaylov, A. F.; Sonnenberg, J. L.; Williams-Young, D.; Ding, F.; Lipparini, F.; Egidi, F.; Goings, J.; Peng, B.; Petrone, A.; Henderson, T.; Ranasinghe, D.; Zakrzewski, V. G.; Gao, J.; Rega, N.; Zheng, G.; Liang, W.; Hada, M.; Ehara, M.; Toyota, K.; Fukuda, R.; Hasegawa, J.; Ishida, M.; Nakajima, T.; Honda, Y.; Kitao, O.; Nakai, H.; Vreven, T.; Throssell, K.; Montgomery, J. A., Jr.; Peralta, J. E.; Ogliaro, F.; Bearpark, M. J.; Heyd, J. J.; Brothers, E. N.; Kudin, K. N.; Staroverov, V. N.; Keith, T. A.; Kobayashi, R.; Normand, J.; Raghavachari, K.; Rendell, A. P.; Burant, J. C.; Iyengar, S. S.; Tomasi, J.; Cossi, M.; Millam, J. M.; Klene, M.; Adamo, C.; Cammi, R.; Ochterski, J. W.; Martin, R. L.; Morokuma, K.; Farkas, O.; Foresman, J. B.; Fox, D. J. *Gaussian 16*, Revision C.01, Gaussian, Inc., Wallingford CT, 2016.
16. J. J. P. Stewart, *J. Mol. Model.*, 2007, **13**, 1173-1213.
17. G. Rauhut, T. Clark and T. Steinke, *J. Am. Chem. Soc.*, 1993, **115**, 9174-9181.
18. Clark, T.; Alex, A.; Beck, B.; Burkhardt, F.; Chandrasekhar, J.; Gedeck, P.; Horn, A. H. C.; Hutter, M.; Martin, B.; Dral, P. O.; Rauhut, G.; Sauer, W.; Schindler, T.; Steinke, T. *VAMP*, FAU Erlangen-Nürnberg, Erlangen, 2019.
19. B. S. Basel, J. Zirzmeier, C. Hetzer, S. R. Reddy, B. T. Phelan, M. D. Krzyaniak, P. B. Coto, M. K. Volland, R. M. Young, T. Clark, M. Thoss, R. R. Tykwinski, M. R. Wasielewski and D. M. Guldi, *Chem*, 2018, **4**, 1092-1111.

20. B. J. Walker, A. J. Musser, D. Beljonne and R. H. Friend, *Nat. Chem.*, 2013, **5**, 1019-1024.
21. J. Zirzmeier, D. Lehnerr, P. B. Coto, E. T. Chernick, R. Casillas, B. S. Basel, M. Thoss, R. R. Tykwinski and D. M. Guldi, *Proc. Natl. Acad. Sci. U.S.A.*, 2015, **112**, 5325-5330.
22. B. S. Basel, J. Zirzmeier, C. Hetzer, B. T. Phelan, M. D. Krzyaniak, S. R. Reddy, P. B. Coto, N. E. Horwitz, R. M. Young, F. J. White, F. Hampel, T. Clark, M. Thoss, R. R. Tykwinski, M. R. Wasielewski and D. M. Guldi, *Nat. Commun.*, 2017, **8**, 15171.
